# Supplementary material for: Sphingolipids, Transcription Factors, and Conserved Toolkit Genes: Developmental Plasticity in the Ant Cardiocondyla obscurior
Source: PubMed Central journal article supplement — Mol Biol Evol. 2015 Mar 27;32(6):1474–86. doi: 10.1093/molbev/msv039 (PMC4615751; doi:10.1093/molbev/msv039), 2015-03-27
Supplement: supp_msv039_supplementary_data.pdf [file supp_msv039_supplementary_data.pdf]

## Supplementary Data

### Gene Ontology enrichment analysis

Gene Ontology (GO) functional annotation terms for all *Cardiocondyla obscurior* protein-coding genes have been published (Schrader et al. 2014) and can be downloaded from [antgenomes.org](http://antgenomes.org). We used topGO (Alexa et al. 2006) to test for enrichment of GO terms (in the domain Biological Process) in the caste-biased gene sets using Fisher's exact test and the Parent-Child-algorithm (Grossmann et al. 2007) and considered GO terms to be significantly enriched at  $p < 0.01$ . We did not correct for multiple testing as the GO enrichment analysis was preliminarily performed for hypothesis generation. Visualization and summarization of the results was done with REVIGO (Supek et al. 2011). We retrieved five (WM), 39 (WO), 32 (QU) and 93 (EM) significantly enriched GO terms for the different gene sets (Supplementary Figures 1-4).

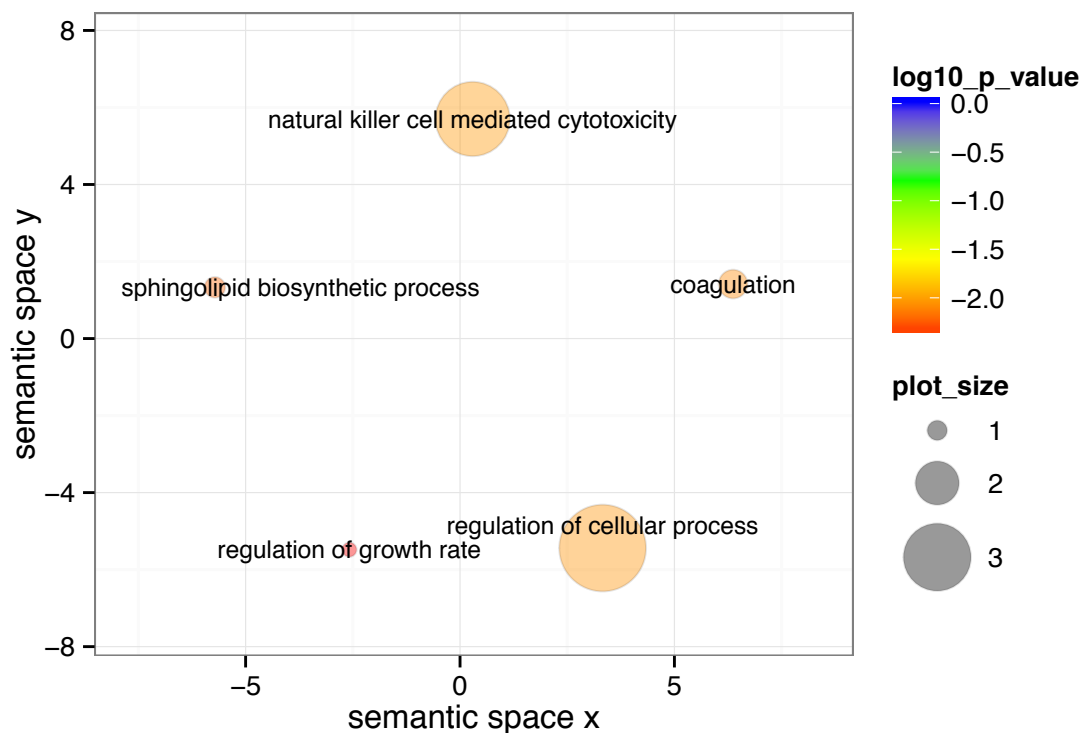

Supplementary Figure 1: GO enrichment analysis on the WM-biased gene set.

The scatter plot shows GO terms in a two-dimensional semantic space after reducing redundancy with REVIGO. Circle sizes are relative to the frequency of GO terms in the data.

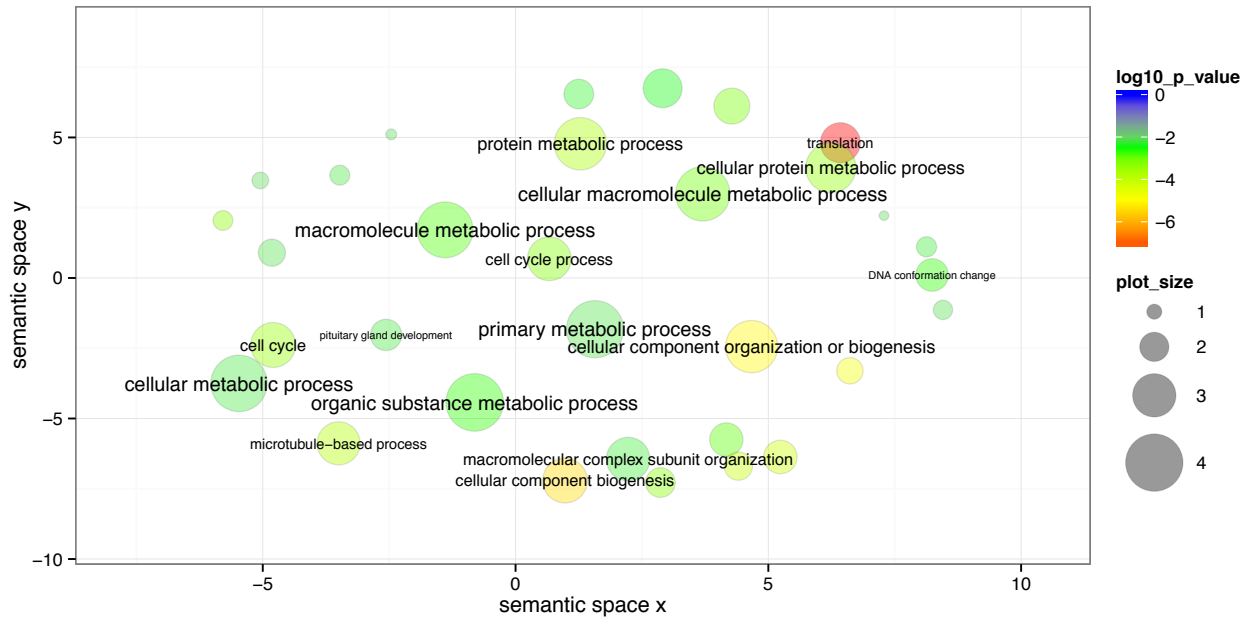

Supplementary Figure 2: GO enrichment analysis on the QU-biased gene set.

The scatter plot shows GO terms in a two-dimensional semantic space after reducing redundancy with REVIGO. Circle sizes are relative to the frequency of GO terms in the data.

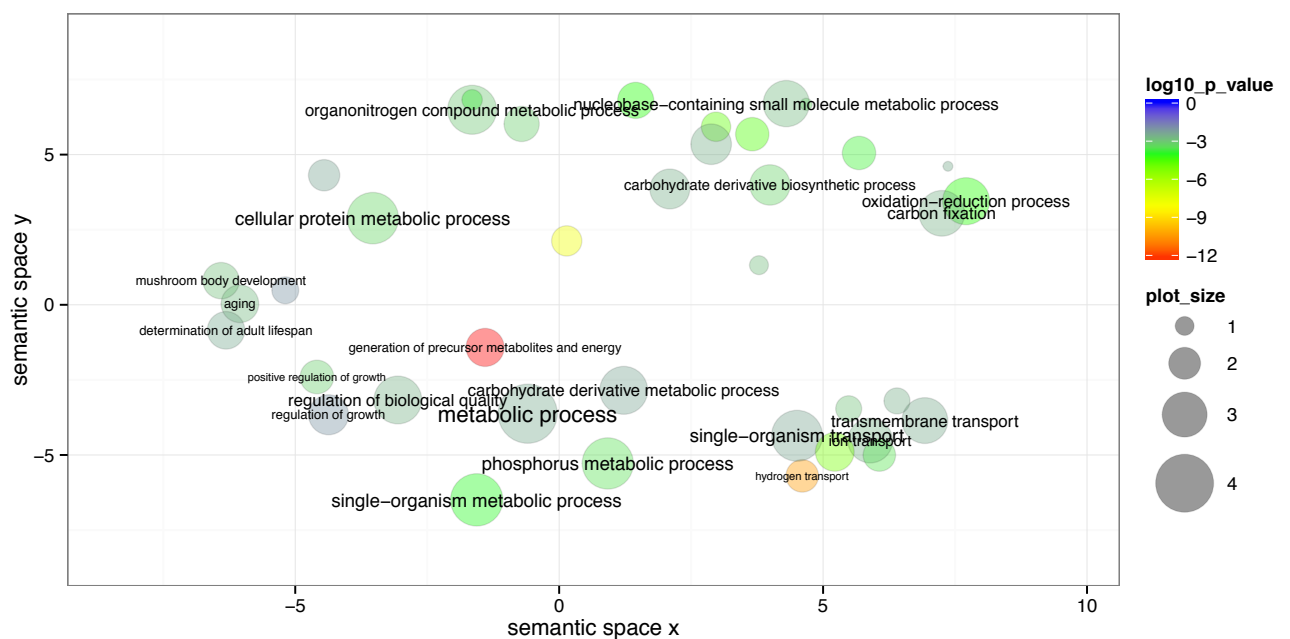

Supplementary Figure 3: GO enrichment analysis on the WO-biased gene set.

The scatter plot shows GO terms in a two-dimensional semantic space after reducing redundancy with REVIGO. Circle sizes are relative to the frequency of GO terms in the data.

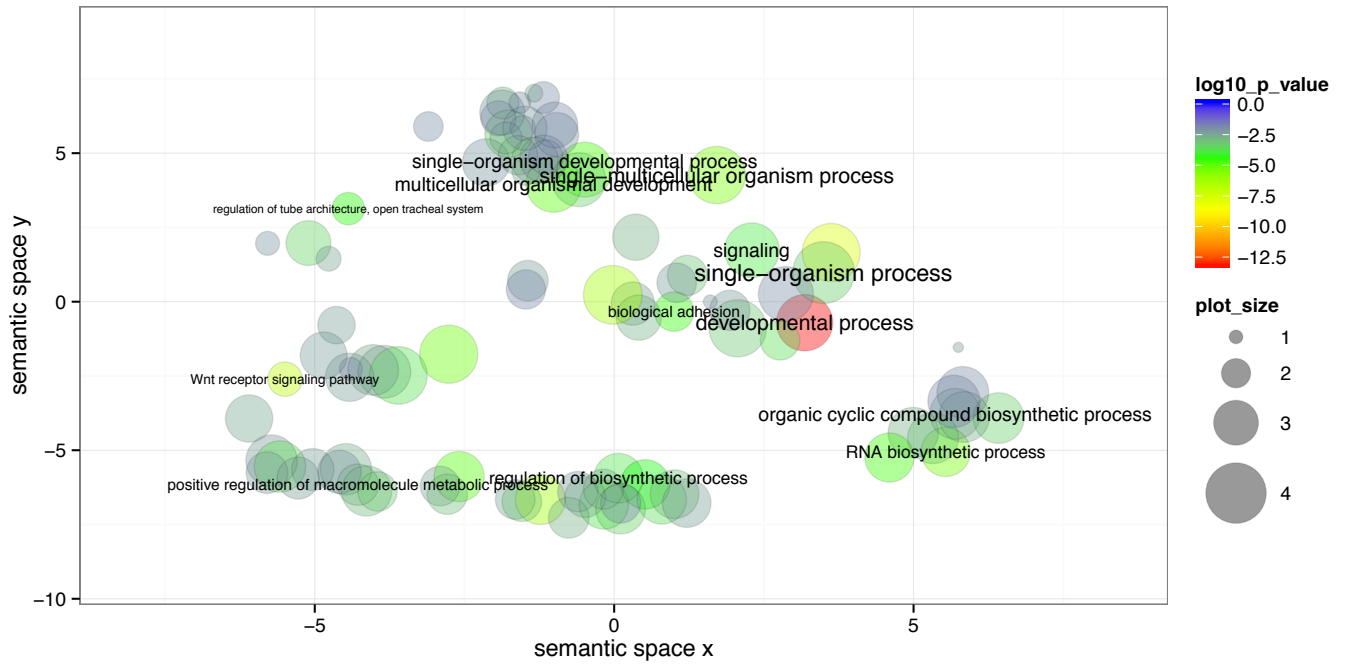

Supplementary Figure 4: GO enrichment analysis on the EM-biased gene set.

The scatter plot shows GO terms in a two-dimensional semantic space after reducing redundancy with REVIGO. Circle sizes are relative to the frequency of GO terms in the data.

Supplementary Table S1: List of genes that are either significantly up- or downregulated in QU compared to all three other phenotypes.

The binary flag Orthology is set to 1, if orthology was confirmed in reciprocal blasts. The columns EM, QU, WM, and WO give the mean expression as assessed by limma. The last six columns give FDR values for pairwise comparisons, also produced with limma.

| FB gene symbol  | FB gene ID  | FB protein ID | C.obs ID   | Orthol. | EM   | QU    | WM    | WO    | EM vs WM | EM vs WO | EM vs QU | QU vs WO | QU vs WM | WO vs WM |
|-----------------|-------------|---------------|------------|---------|------|-------|-------|-------|----------|----------|----------|----------|----------|----------|
| <i>Ac78C</i>    | FBgn0024150 | FBpp0290915   | Cobs_00021 | 1       | 2.16 | 3.63  | 1.28  | 2.28  | 1.62E-01 | 7.81E-01 | 1.11E-03 | 3.60E-03 | 3.57E-05 | 1.06E-01 |
| <i>CG5880</i>   | FBgn0039489 | FBpp0084478   | Cobs_00037 | 1       | 4.47 | 5.11  | 4.58  | 4.64  | 7.41E-01 | 5.27E-01 | 8.63E-03 | 5.00E-02 | 1.87E-02 | 8.47E-01 |
| <i>Ing3</i>     | FBgn0030945 | FBpp0074385   | Cobs_00038 | 1       | 5.23 | 5.75  | 5.12  | 5.20  | 7.04E-01 | 8.86E-01 | 2.06E-02 | 1.27E-02 | 4.72E-03 | 8.63E-01 |
| -               | -           | FBpp0291979   | Cobs_00043 | 0       | 1.34 | 2.04  | 1.02  | 0.76  | 4.47E-01 | 1.53E-01 | 4.17E-02 | 1.43E-03 | 3.67E-03 | 6.45E-01 |
| <i>CG34280</i>  | FBgn0085309 | FBpp0111390   | Cobs_00098 | 0       | 4.25 | 4.92  | 3.90  | 3.78  | 3.10E-01 | 1.74E-01 | 3.51E-02 | 1.32E-03 | 1.50E-03 | 8.54E-01 |
| <i>Rpn1</i>     | FBgn0028695 | FBpp0074662   | Cobs_00121 | 1       | 7.93 | 7.23  | 8.03  | 8.10  | 7.97E-01 | 6.06E-01 | 2.14E-02 | 4.41E-03 | 7.39E-03 | 8.74E-01 |
| <i>PGRP-SA</i>  | FBgn0030310 | FBpp0073358   | Cobs_00125 | 1       | 5.10 | 6.56  | 5.40  | 4.03  | 7.56E-01 | 1.07E-01 | 1.87E-02 | 4.61E-04 | 3.79E-02 | 7.60E-02 |
| <i>thoc6</i>    | FBgn0036263 | FBpp0075751   | Cobs_00236 | 1       | 4.43 | 3.50  | 4.46  | 4.55  | 9.02E-01 | 7.11E-01 | 2.30E-03 | 8.80E-04 | 1.21E-03 | 8.57E-01 |
| <i>su(w[a])</i> | FBgn0003638 | FBpp0070171   | Cobs_00240 | 1       | 6.57 | 6.95  | 6.52  | 6.43  | 7.93E-01 | 3.27E-01 | 8.52E-03 | 5.98E-04 | 2.81E-03 | 6.01E-01 |
| <i>sofe</i>     | FBgn0030242 | FBpp0073265   | Cobs_00342 | 1       | 6.39 | 5.08  | 6.30  | 5.70  | 7.41E-01 | 4.62E-03 | 8.90E-06 | 1.35E-02 | 2.50E-05 | 2.92E-02 |
| <i>CG8173</i>   | FBgn0030864 | FBpp0074249   | Cobs_00377 | 1       | 5.22 | 3.76  | 5.00  | 4.38  | 4.03E-01 | 1.20E-03 | 6.35E-06 | 2.64E-02 | 4.49E-05 | 2.78E-02 |
| <i>CG4281</i>   | FBgn0025626 | FBpp0070325   | Cobs_00390 | 1       | 5.11 | 5.77  | 5.15  | 5.31  | 8.96E-01 | 3.52E-01 | 3.22E-03 | 3.90E-02 | 3.91E-03 | 5.24E-01 |
| <i>RpS29</i>    | FBgn0261599 | FBpp0081614   | Cobs_00449 | 1       | 9.54 | 10.47 | 10.08 | 10.05 | 1.82E-03 | 9.71E-04 | 1.27E-06 | 5.98E-03 | 8.25E-03 | 9.20E-01 |
| <i>p</i>        | FBgn0086679 | FBpp0081373   | Cobs_00634 | 1       | 5.51 | 6.18  | 5.68  | 5.65  | 4.08E-01 | 4.70E-01 | 5.12E-04 | 4.41E-03 | 4.76E-03 | 9.34E-01 |
| <i>RpS11</i>    | FBgn0033699 | FBpp0087115   | Cobs_00638 | 1       | 9.35 | 10.25 | 9.48  | 9.68  | 6.62E-01 | 1.92E-01 | 1.14E-03 | 3.32E-02 | 4.02E-03 | 5.38E-01 |
| <i>Rpn5</i>     | FBgn0028690 | FBpp0078278   | Cobs_00663 | 1       | 5.75 | 5.15  | 6.03  | 6.19  | 3.11E-01 | 8.24E-02 | 2.56E-02 | 3.15E-04 | 1.13E-03 | 6.56E-01 |
| <i>Dscam2</i>   | FBgn0265296 | FBpp0288824   | Cobs_00691 | 1       | 4.33 | 4.98  | 4.15  | 4.35  | 5.81E-01 | 9.47E-01 | 3.32E-02 | 4.21E-02 | 4.76E-03 | 5.70E-01 |
| <i>Rpb12</i>    | FBgn0262954 | FBpp0111294   | Cobs_00784 | 1       | 2.93 | 2.26  | 3.26  | 3.25  | 2.13E-01 | 2.34E-01 | 2.40E-02 | 1.36E-03 | 6.70E-04 | 9.52E-01 |
| <i>Ercc1</i>    | FBgn0028434 | FBpp0086578   | Cobs_00869 | 1       | 4.71 | 5.55  | 4.78  | 4.97  | 8.21E-01 | 2.66E-01 | 3.85E-04 | 8.83E-03 | 6.82E-04 | 4.88E-01 |
| <i>Rab3-GEF</i> | FBgn0030613 | FBpp0298037   | Cobs_00880 | 1       | 5.81 | 6.63  | 5.84  | 6.12  | 9.15E-01 | 1.39E-01 | 2.97E-04 | 1.54E-02 | 3.83E-04 | 2.44E-01 |
| <i>shg</i>      | FBgn0003391 | FBpp0071475   | Cobs_00906 | 1       | 7.25 | 6.61  | 6.90  | 6.90  | 2.62E-02 | 1.38E-02 | 6.75E-05 | 4.43E-02 | 3.90E-02 | 9.95E-01 |
| <i>zfh2</i>     | FBgn0004607 | FBpp0297996   | Cobs_00923 | 0       | 6.20 | 4.62  | 6.65  | 6.20  | 3.03E-01 | 9.86E-01 | 4.73E-04 | 5.09E-04 | 3.05E-05 | 3.44E-01 |
| <i>Sik2</i>     | FBgn0025625 | FBpp0070326   | Cobs_00973 | 1       | 6.60 | 7.06  | 6.07  | 6.55  | 2.16E-02 | 8.43E-01 | 2.56E-02 | 1.29E-02 | 3.47E-05 | 4.24E-02 |
| <i>Fit1</i>     | FBgn0035498 | FBpp0073066   | Cobs_00979 | 0       | 6.28 | 6.57  | 6.23  | 6.10  | 7.43E-01 | 1.33E-01 | 2.00E-02 | 4.11E-04 | 5.35E-03 | 3.55E-01 |

|                    |             |               |            |   |       |       |       |       |          |          |          |          |          |          |
|--------------------|-------------|---------------|------------|---|-------|-------|-------|-------|----------|----------|----------|----------|----------|----------|
| <i>Aats-glupro</i> | FBgn0005674 | FBpp0083898   | Cobs_00984 | 1 | 7.16  | 6.61  | 7.08  | 7.27  | 7.86E-01 | 6.89E-01 | 2.16E-02 | 6.01E-03 | 4.26E-02 | 5.13E-01 |
| <i>prtp</i>        | FBgn0030329 | FBpp0292398   | Cobs_01042 | 1 | 5.40  | 4.81  | 5.59  | 5.28  | 3.66E-01 | 5.62E-01 | 3.93E-03 | 2.08E-02 | 2.34E-04 | 1.41E-01 |
| <i>Hel25E</i>      | FBgn0014189 | FBpp0078756   | Cobs_01047 | 1 | 7.10  | 6.54  | 7.27  | 7.46  | 5.88E-01 | 1.64E-01 | 2.64E-02 | 7.12E-04 | 4.11E-03 | 5.56E-01 |
| <i>mad2</i>        | FBgn0035640 | FBpp0076819   | Cobs_01100 | 1 | 3.83  | 3.12  | 3.68  | 3.61  | 5.34E-01 | 3.29E-01 | 3.46E-03 | 4.66E-02 | 1.59E-02 | 8.32E-01 |
| <i>Nopp140</i>     | FBgn0037137 | FBpp0089003   | Cobs_01163 | 1 | 8.86  | 8.12  | 9.04  | 8.82  | 6.93E-01 | 9.36E-01 | 4.05E-02 | 4.80E-02 | 9.84E-03 | 6.60E-01 |
| <i>RpS10b</i>      | FBgn0261593 | FBpp0300512   | Cobs_01168 | 0 | 4.84  | 5.85  | 5.23  | 5.29  | 2.15E-01 | 1.30E-01 | 6.17E-04 | 3.17E-02 | 1.62E-02 | 9.12E-01 |
| <i>Unc-76</i>      | FBgn0040395 | FBpp0070361   | Cobs_01214 | 1 | 6.56  | 7.21  | 6.31  | 6.55  | 1.86E-01 | 9.68E-01 | 5.91E-04 | 5.65E-04 | 1.62E-05 | 2.31E-01 |
| <i>CG11985</i>     | FBgn0040534 | FBpp0081484   | Cobs_01225 | 1 | 3.67  | 3.07  | 3.61  | 3.79  | 8.75E-01 | 6.71E-01 | 2.63E-02 | 8.28E-03 | 3.44E-02 | 5.83E-01 |
| NA                 | NA          | No hits found | Cobs_01226 | 0 | 0.58  | 1.54  | 0.66  | 0.12  | 9.57E-01 | 3.14E-01 | 2.18E-02 | 1.64E-03 | 1.93E-02 | 3.36E-01 |
| <i>RpL18</i>       | FBgn0035753 | FBpp0076602   | Cobs_01232 | 1 | 10.65 | 11.60 | 10.63 | 10.87 | 9.70E-01 | 3.09E-01 | 6.75E-05 | 1.35E-03 | 6.97E-05 | 3.50E-01 |
| <i>IA-2</i>        | FBgn0031294 | FBpp0290631   | Cobs_01234 | 1 | 5.23  | 5.97  | 5.26  | 5.47  | 9.55E-01 | 2.81E-01 | 1.01E-03 | 1.82E-02 | 9.74E-04 | 3.83E-01 |
| <i>Sik3</i>        | FBgn0262103 | FBpp0292993   | Cobs_01244 | 0 | 4.22  | 3.31  | 4.33  | 3.82  | 7.06E-01 | 6.80E-02 | 2.39E-04 | 2.84E-02 | 6.87E-05 | 4.14E-02 |
| NA                 | NA          | No hits found | Cobs_01246 | 0 | 4.52  | 4.99  | 3.99  | 4.44  | 5.24E-02 | 8.87E-01 | 4.23E-02 | 2.74E-02 | 1.70E-04 | 9.66E-02 |
| NA                 | NA          | No hits found | Cobs_01267 | 0 | 0.97  | 1.82  | 1.08  | 0.85  | 7.67E-01 | 8.90E-01 | 2.60E-02 | 1.83E-02 | 4.90E-02 | 6.89E-01 |
| <i>CG14762</i>     | FBgn0033250 | FBpp0293292   | Cobs_01278 | 1 | 6.61  | 7.85  | 6.89  | 7.06  | 4.87E-01 | 2.14E-01 | 1.08E-03 | 2.70E-02 | 7.32E-03 | 7.48E-01 |
| <i>CG12325</i>     | FBgn0033557 | FBpp0087322   | Cobs_01296 | 1 | 5.51  | 4.87  | 5.60  | 5.44  | 7.60E-01 | 7.90E-01 | 1.82E-02 | 3.96E-02 | 5.25E-03 | 5.80E-01 |
| <i>morgue</i>      | FBgn0027609 | FBpp0077147   | Cobs_01297 | 1 | 5.24  | 5.93  | 5.33  | 5.37  | 6.85E-01 | 5.18E-01 | 3.46E-04 | 2.67E-03 | 1.07E-03 | 8.87E-01 |
| <i>CG7509</i>      | FBgn0035575 | FBpp0073218   | Cobs_01322 | 0 | 0.39  | 1.45  | 0.23  | 0.15  | 8.69E-01 | 7.38E-01 | 3.63E-02 | 1.35E-02 | 1.68E-02 | 9.11E-01 |
| <i>Timp</i>        | FBgn0025879 | FBpp0081722   | Cobs_01323 | 1 | 3.45  | 4.18  | 3.58  | 3.32  | 6.98E-01 | 8.44E-01 | 8.61E-03 | 5.62E-03 | 2.10E-02 | 5.81E-01 |
| <i>CG32809</i>     | FBgn0023531 | FBpp0300641   | Cobs_01367 | 1 | 5.25  | 5.71  | 5.26  | 5.23  | 9.65E-01 | 9.87E-01 | 3.26E-02 | 3.00E-02 | 3.03E-02 | 9.60E-01 |
| <i>CG14619</i>     | FBgn0031187 | FBpp0077042   | Cobs_01379 | 1 | 7.49  | 7.82  | 7.31  | 7.30  | 1.78E-01 | 1.06E-01 | 7.59E-03 | 1.18E-04 | 1.45E-04 | 9.31E-01 |
| <i>dsx</i>         | FBgn0000504 | FBpp0081256   | Cobs_01393 | 0 | 4.24  | 1.22  | 3.43  | 2.53  | 2.59E-02 | 8.96E-05 | 1.32E-06 | 1.64E-02 | 8.16E-05 | 4.84E-02 |
| <i>CG17807</i>     | FBgn0034748 | FBpp0071849   | Cobs_01394 | 0 | 4.33  | 1.41  | 2.70  | 2.86  | 6.95E-04 | 8.69E-04 | 6.35E-06 | 1.34E-02 | 1.97E-02 | 8.45E-01 |
| <i>CG4662</i>      | FBgn0038735 | FBpp0083224   | Cobs_01462 | 1 | 4.82  | 5.28  | 4.89  | 4.50  | 8.81E-01 | 1.09E-01 | 3.05E-02 | 5.69E-04 | 3.91E-02 | 1.07E-01 |
| <i>Cap-G</i>       | FBgn0259876 | FBpp0290540   | Cobs_01472 | 1 | 4.45  | 3.40  | 4.20  | 3.92  | 2.55E-01 | 1.10E-02 | 2.90E-05 | 2.30E-02 | 5.75E-04 | 2.47E-01 |
| <i>CG10249</i>     | FBgn0027596 | FBpp0292770   | Cobs_01495 | 1 | 7.28  | 7.72  | 7.18  | 7.16  | 6.93E-01 | 6.21E-01 | 4.42E-02 | 1.03E-02 | 1.09E-02 | 9.63E-01 |
| -                  | -           | FBpp0289893   | Cobs_01504 | 1 | 8.20  | 7.17  | 8.07  | 7.53  | 4.99E-01 | 2.12E-04 | 1.32E-06 | 2.88E-02 | 9.30E-06 | 5.48E-03 |
| <i>dUTPase</i>     | FBgn0250837 | FBpp0079745   | Cobs_01527 | 0 | 2.84  | 1.10  | 2.81  | 2.71  | 9.63E-01 | 8.61E-01 | 1.51E-03 | 3.04E-03 | 1.36E-03 | 9.21E-01 |
| <i>CG17271</i>     | FBgn0038829 | FBpp0083397   | Cobs_01549 | 0 | 2.37  | 3.01  | 2.23  | 2.20  | 6.27E-01 | 6.14E-01 | 2.14E-02 | 5.91E-03 | 3.44E-03 | 9.93E-01 |

|                   |             |               |            |   |       |       |       |       |          |          |          |          |          |          |
|-------------------|-------------|---------------|------------|---|-------|-------|-------|-------|----------|----------|----------|----------|----------|----------|
| <i>CG6723</i>     | FBgn0037895 | FBpp0081881   | Cobs_01583 | 0 | 6.01  | 4.24  | 6.50  | 5.92  | 3.79E-01 | 8.68E-01 | 2.20E-03 | 3.85E-03 | 1.78E-04 | 3.08E-01 |
| <i>lat</i>        | FBgn0005654 | FBpp0086881   | Cobs_01587 | 1 | 4.64  | 4.10  | 4.66  | 4.66  | 9.57E-01 | 9.67E-01 | 2.96E-02 | 2.55E-02 | 1.91E-02 | 9.93E-01 |
| <i>Rheb</i>       | FBgn0041191 | FBpp0078343   | Cobs_01616 | 1 | 6.44  | 7.23  | 6.66  | 6.55  | 4.90E-01 | 7.25E-01 | 5.53E-03 | 1.55E-02 | 3.52E-02 | 7.99E-01 |
| -                 | -           | FBpp0087143   | Cobs_01649 | 0 | 12.21 | 12.84 | 12.41 | 12.41 | 3.60E-01 | 3.19E-01 | 2.43E-03 | 3.31E-02 | 3.06E-02 | 9.99E-01 |
| <i>RPA2</i>       | FBgn0032906 | FBpp0080967   | Cobs_01658 | 1 | 5.44  | 4.82  | 5.61  | 5.72  | 5.42E-01 | 3.00E-01 | 2.52E-02 | 1.68E-03 | 3.21E-03 | 8.02E-01 |
| <i>His2Av</i>     | FBgn0001197 | FBpp0084434   | Cobs_01771 | 1 | 6.31  | 5.60  | 6.13  | 6.27  | 5.61E-01 | 8.99E-01 | 1.13E-02 | 1.62E-02 | 4.94E-02 | 7.16E-01 |
| <i>CG10738</i>    | FBgn0036368 | FBpp0291649   | Cobs_01779 | 1 | 3.01  | 1.79  | 3.19  | 2.54  | 4.34E-01 | 1.24E-01 | 2.02E-04 | 1.27E-02 | 2.68E-05 | 3.29E-02 |
| <i>Aats-tyr-m</i> | FBgn0035064 | FBpp0072334   | Cobs_01783 | 1 | 6.05  | 5.34  | 6.06  | 5.74  | 9.64E-01 | 6.15E-02 | 1.24E-04 | 1.76E-02 | 1.08E-04 | 8.75E-02 |
| <i>DNaseII</i>    | FBgn0000477 | FBpp0082962   | Cobs_01796 | 1 | 7.12  | 9.36  | 7.77  | 7.10  | 4.72E-01 | 9.90E-01 | 6.23E-03 | 5.77E-03 | 4.31E-02 | 4.99E-01 |
| <i>Mgat2</i>      | FBgn0039738 | FBpp0084967   | Cobs_01890 | 1 | 4.96  | 5.91  | 5.02  | 4.94  | 9.09E-01 | 9.97E-01 | 1.17E-02 | 1.18E-02 | 1.32E-02 | 9.23E-01 |
| <i>CG10588</i>    | FBgn0037037 | FBpp0077942   | Cobs_01907 | 1 | 7.10  | 6.60  | 7.30  | 7.20  | 4.26E-01 | 6.94E-01 | 2.62E-02 | 7.55E-03 | 2.07E-03 | 7.60E-01 |
| <i>Gp93</i>       | FBgn0039562 | FBpp0084623   | Cobs_01919 | 1 | 8.82  | 7.53  | 9.03  | 9.59  | 8.01E-01 | 2.41E-01 | 4.79E-02 | 2.18E-03 | 1.81E-02 | 4.84E-01 |
| <i>Clk</i>        | FBgn0023076 | FBpp0076500   | Cobs_01969 | 1 | 2.88  | 3.55  | 2.88  | 2.53  | 9.41E-01 | 2.81E-01 | 1.86E-02 | 1.43E-03 | 1.01E-02 | 3.87E-01 |
| -                 | -           | FBpp0297600   | Cobs_02024 | 1 | 11.60 | 12.59 | 11.97 | 12.16 | 7.06E-02 | 3.58E-03 | 1.47E-05 | 2.77E-02 | 2.05E-03 | 4.20E-01 |
| <i>CG10960</i>    | FBgn0036316 | FBpp0075675   | Cobs_02032 | 0 | 4.19  | 6.50  | 3.64  | 4.71  | 4.90E-01 | 3.62E-01 | 1.05E-04 | 1.52E-03 | 2.31E-05 | 1.22E-01 |
| <i>Mcm6</i>       | FBgn0025815 | FBpp0070913   | Cobs_02040 | 1 | 6.09  | 4.87  | 5.85  | 5.62  | 5.52E-01 | 1.85E-01 | 1.48E-03 | 4.42E-02 | 7.09E-03 | 6.16E-01 |
| <i>CG10068</i>    | FBgn0037473 | FBpp0081128   | Cobs_02103 | 1 | 4.41  | 3.90  | 4.48  | 4.28  | 7.42E-01 | 5.29E-01 | 6.51E-03 | 3.88E-02 | 1.73E-03 | 3.48E-01 |
| <i>NA</i>         | NA          | No hits found | Cobs_02244 | 0 | 3.59  | 3.00  | 3.62  | 3.61  | 8.76E-01 | 9.09E-01 | 1.39E-02 | 1.03E-02 | 6.08E-03 | 9.76E-01 |
| <i>CG43347</i>    | FBgn0263072 | FBpp0297865   | Cobs_02247 | 1 | 6.82  | 7.20  | 6.64  | 6.72  | 3.15E-01 | 5.87E-01 | 2.44E-02 | 4.84E-03 | 1.07E-03 | 7.18E-01 |
| <i>eco</i>        | FBgn0035766 | FBpp0099670   | Cobs_02248 | 1 | 5.85  | 5.09  | 6.12  | 5.81  | 2.75E-01 | 8.99E-01 | 1.58E-03 | 2.67E-03 | 6.56E-05 | 2.32E-01 |
| <i>cup</i>        | FBgn0000392 | FBpp0288761   | Cobs_02272 | 0 | 2.42  | 1.66  | 2.31  | 2.50  | 7.26E-01 | 8.47E-01 | 1.67E-02 | 1.00E-02 | 3.62E-02 | 6.03E-01 |
| <i>Uba2</i>       | FBgn0029113 | FBpp0076457   | Cobs_02475 | 1 | 6.08  | 5.54  | 6.10  | 5.91  | 9.52E-01 | 3.72E-01 | 4.83E-03 | 4.97E-02 | 3.08E-03 | 3.88E-01 |
| <i>Bin1</i>       | FBgn0024491 | FBpp0082731   | Cobs_02515 | 1 | 4.91  | 4.47  | 5.16  | 5.31  | 2.50E-01 | 4.71E-02 | 4.01E-02 | 2.95E-04 | 1.28E-03 | 5.81E-01 |
| <i>CG8545</i>     | FBgn0033741 | FBpp0087045   | Cobs_02568 | 1 | 4.80  | 3.99  | 4.93  | 4.77  | 7.47E-01 | 9.06E-01 | 3.08E-02 | 4.40E-02 | 8.91E-03 | 6.82E-01 |
| <i>CG32350</i>    | FBgn0052350 | FBpp0070045   | Cobs_02662 | 0 | 1.08  | -0.24 | 0.94  | 0.85  | 9.09E-01 | 8.09E-01 | 2.05E-02 | 4.69E-02 | 2.42E-02 | 9.25E-01 |
| <i>CG17271</i>    | FBgn0038829 | FBpp0083397   | Cobs_02673 | 0 | 3.92  | 3.29  | 4.04  | 4.39  | 6.45E-01 | 4.08E-02 | 1.37E-02 | 1.06E-04 | 2.56E-03 | 1.89E-01 |
| <i>mira</i>       | FBgn0021776 | FBpp0083256   | Cobs_02745 | 0 | 6.35  | 5.32  | 6.17  | 5.94  | 4.28E-01 | 3.50E-02 | 1.49E-05 | 3.60E-03 | 1.43E-04 | 3.13E-01 |
| <i>Su(var)3-3</i> | FBgn0260397 | FBpp0074595   | Cobs_02774 | 1 | 3.93  | 3.34  | 3.92  | 3.80  | 9.84E-01 | 6.41E-01 | 8.80E-03 | 3.50E-02 | 7.02E-03 | 7.12E-01 |
| <i>Alk</i>        | FBgn0040505 | FBpp0086264   | Cobs_02828 | 1 | 5.52  | 6.19  | 5.11  | 5.54  | 5.05E-02 | 9.07E-01 | 8.03E-04 | 1.36E-03 | 4.12E-06 | 4.29E-02 |

|                    |             |               |            |   |       |       |       |       |          |          |          |          |          |          |
|--------------------|-------------|---------------|------------|---|-------|-------|-------|-------|----------|----------|----------|----------|----------|----------|
| <i>CG18586</i>     | FBgn0035642 | FBpp0290125   | Cobs_02847 | 0 | 3.25  | 2.32  | 3.25  | 3.10  | 9.56E-01 | 6.97E-01 | 6.01E-03 | 2.03E-02 | 3.71E-03 | 6.93E-01 |
| <i>Esp</i>         | FBgn0013953 | FBpp0293017   | Cobs_02860 | 0 | 1.55  | 0.16  | 1.53  | 1.31  | 9.58E-01 | 7.76E-01 | 7.71E-03 | 2.07E-02 | 4.89E-03 | 7.67E-01 |
| -                  | -           | FBpp0297154   | Cobs_02974 | 1 | 5.31  | 5.74  | 5.37  | 5.38  | 7.60E-01 | 6.79E-01 | 2.19E-03 | 8.31E-03 | 4.72E-03 | 9.47E-01 |
| <i>Rps28b</i>      | FBgn0030136 | FBpp0071295   | Cobs_03009 | 1 | 7.14  | 7.69  | 6.98  | 7.25  | 3.67E-01 | 5.36E-01 | 1.27E-03 | 7.60E-03 | 8.35E-05 | 1.30E-01 |
| <i>numb</i>        | FBgn0002973 | FBpp0079420   | Cobs_03040 | 0 | 4.95  | 5.34  | 4.54  | 4.94  | 4.88E-02 | 9.78E-01 | 4.01E-02 | 4.39E-02 | 1.43E-04 | 5.44E-02 |
| <i>CG42321</i>     | FBgn0259221 | FBpp0289039   | Cobs_03043 | 1 | 6.68  | 7.24  | 6.83  | 6.78  | 4.17E-01 | 6.00E-01 | 1.42E-03 | 6.73E-03 | 1.34E-02 | 8.32E-01 |
| NA                 | NA          | No hits found | Cobs_03049 | 0 | 2.82  | 3.83  | 3.13  | 3.25  | 4.10E-01 | 2.18E-01 | 1.49E-03 | 3.93E-02 | 1.11E-02 | 8.06E-01 |
| NA                 | NA          | No hits found | Cobs_03059 | 0 | 0.81  | 1.43  | 0.13  | 0.58  | 3.88E-02 | 4.37E-01 | 2.92E-02 | 3.90E-03 | 8.44E-05 | 2.39E-01 |
| <i>slbo</i>        | FBgn0005638 | FBpp0072179   | Cobs_03144 | 1 | 4.72  | 5.64  | 4.75  | 4.18  | 9.80E-01 | 1.41E-01 | 9.10E-03 | 2.48E-04 | 7.34E-03 | 1.79E-01 |
| <i>T-cp1</i>       | FBgn0003676 | FBpp0083684   | Cobs_03167 | 1 | 8.08  | 7.34  | 8.07  | 8.30  | 9.62E-01 | 4.03E-01 | 3.97E-03 | 3.87E-04 | 3.95E-03 | 4.29E-01 |
| <i>CG15270</i>     | FBgn0028879 | FBpp0089099   | Cobs_03223 | 1 | 3.48  | 4.75  | 3.38  | 3.65  | 7.08E-01 | 5.07E-01 | 1.49E-05 | 1.49E-04 | 4.99E-06 | 3.10E-01 |
| NA                 | NA          | No hits found | Cobs_03237 | 0 | 2.05  | 3.53  | 2.19  | 2.58  | 7.51E-01 | 8.24E-02 | 1.49E-05 | 1.64E-03 | 3.28E-05 | 2.37E-01 |
| <i>ap</i>          | FBgn0000099 | FBpp0085394   | Cobs_03292 | 0 | 4.24  | 5.26  | 3.90  | 3.35  | 2.61E-01 | 6.06E-03 | 5.95E-04 | 2.49E-06 | 2.50E-05 | 1.54E-01 |
| <i>alphaTub84B</i> | FBgn0003884 | FBpp0081153   | Cobs_03364 | 0 | 4.08  | 2.90  | 3.91  | 3.98  | 7.54E-01 | 8.43E-01 | 6.56E-03 | 1.30E-02 | 1.32E-02 | 9.36E-01 |
| <i>CycA</i>        | FBgn0000404 | FBpp0075807   | Cobs_03386 | 1 | 5.42  | 4.50  | 5.21  | 5.20  | 3.31E-01 | 2.66E-01 | 5.07E-05 | 1.38E-03 | 8.03E-04 | 9.65E-01 |
| <i>Lst8</i>        | FBgn0264691 | FBpp0071303   | Cobs_03476 | 1 | 5.91  | 5.51  | 6.08  | 6.03  | 4.11E-01 | 5.45E-01 | 3.49E-02 | 6.19E-03 | 2.58E-03 | 8.75E-01 |
| <i>spir</i>        | FBgn0003475 | FBpp0080886   | Cobs_03485 | 1 | 5.88  | 6.35  | 5.91  | 5.81  | 9.00E-01 | 6.69E-01 | 1.26E-03 | 3.87E-04 | 1.63E-03 | 6.10E-01 |
| <i>Apc</i>         | FBgn0015589 | FBpp0084720   | Cobs_03506 | 1 | 8.00  | 8.40  | 7.94  | 7.95  | 7.84E-01 | 7.81E-01 | 1.33E-02 | 5.08E-03 | 4.34E-03 | 9.97E-01 |
| <i>Rps15</i>       | FBgn0034138 | FBpp0086270   | Cobs_03513 | 1 | 10.02 | 11.07 | 10.24 | 10.46 | 3.91E-01 | 5.08E-02 | 5.19E-05 | 1.00E-02 | 7.37E-04 | 4.32E-01 |
| <i>Act57B</i>      | FBgn0000044 | FBpp0071448   | Cobs_03578 | 0 | 3.49  | 3.97  | 3.43  | 3.18  | 8.76E-01 | 2.86E-01 | 4.28E-02 | 3.22E-03 | 1.96E-02 | 4.57E-01 |
| <i>Dyb</i>         | FBgn0033739 | FBpp0300837   | Cobs_03613 | 0 | 4.33  | 4.70  | 4.28  | 4.23  | 7.61E-01 | 4.94E-01 | 6.16E-03 | 1.04E-03 | 1.72E-03 | 7.96E-01 |
| <i>CG13409</i>     | FBgn0038926 | FBpp0083582   | Cobs_03656 | 1 | 3.97  | 5.24  | 3.97  | 4.65  | 9.37E-01 | 1.79E-03 | 1.07E-06 | 2.18E-03 | 8.28E-07 | 3.92E-03 |
| <i>Gbs-76A</i>     | FBgn0036862 | FBpp0074781   | Cobs_03704 | 1 | 4.95  | 4.33  | 5.04  | 4.94  | 7.74E-01 | 9.59E-01 | 1.93E-02 | 2.24E-02 | 5.79E-03 | 7.67E-01 |
| NA                 | NA          | No hits found | Cobs_03706 | 0 | 0.73  | -0.51 | 0.95  | 1.39  | 7.48E-01 | 2.19E-01 | 4.28E-02 | 1.79E-03 | 1.17E-02 | 4.77E-01 |
| -                  | -           | FBpp0089333   | Cobs_03731 | 0 | 9.62  | 8.99  | 9.46  | 9.37  | 3.87E-01 | 1.45E-01 | 4.37E-04 | 1.96E-02 | 5.10E-03 | 7.36E-01 |
| <i>U2A</i>         | FBgn0033210 | FBpp0088015   | Cobs_03738 | 1 | 6.56  | 7.16  | 6.42  | 6.68  | 5.02E-01 | 5.75E-01 | 1.92E-03 | 1.00E-02 | 2.16E-04 | 2.20E-01 |
| <i>Spf45</i>       | FBgn0086683 | FBpp0110561   | Cobs_03783 | 1 | 5.52  | 5.95  | 5.53  | 5.32  | 9.93E-01 | 3.47E-01 | 4.02E-02 | 3.39E-03 | 3.39E-02 | 4.03E-01 |
| <i>CG12576</i>     | FBgn0031190 | FBpp0077058   | Cobs_03806 | 0 | 4.85  | 6.23  | 4.73  | 4.23  | 8.15E-01 | 2.29E-01 | 3.74E-03 | 2.20E-04 | 1.28E-03 | 4.37E-01 |
| <i>Cdc6</i>        | FBgn0035918 | FBpp0076371   | Cobs_03865 | 1 | 4.42  | 3.09  | 4.43  | 4.40  | 9.68E-01 | 9.15E-01 | 1.14E-02 | 1.55E-02 | 7.48E-03 | 9.02E-01 |

|                |             |               |            |   |       |       |       |       |          |          |          |          |          |          |
|----------------|-------------|---------------|------------|---|-------|-------|-------|-------|----------|----------|----------|----------|----------|----------|
| <i>CG8927</i>  | FBgn0038405 | FBpp0082708   | Cobs_03941 | 1 | 4.36  | 2.55  | 3.36  | 3.29  | 3.49E-03 | 1.28E-03 | 1.39E-05 | 4.93E-02 | 2.20E-02 | 8.85E-01 |
| -              | -           | FBpp0290378   | Cobs_03957 | 0 | 4.02  | 4.44  | 3.50  | 4.01  | 2.40E-02 | 9.80E-01 | 3.37E-02 | 3.21E-02 | 5.30E-05 | 3.33E-02 |
| -              | -           | FBpp0300544   | Cobs_04027 | 1 | 6.16  | 5.64  | 6.51  | 6.81  | 1.53E-01 | 5.28E-03 | 3.42E-02 | 3.44E-05 | 5.32E-04 | 2.79E-01 |
| <i>CG34127</i> | FBgn0083963 | FBpp0290294   | Cobs_04083 | 1 | 3.67  | 4.28  | 3.30  | 3.81  | 1.26E-01 | 4.66E-01 | 3.19E-03 | 2.68E-02 | 4.02E-05 | 3.08E-02 |
| -              | -           | FBpp0082082   | Cobs_04142 | 1 | 7.54  | 8.25  | 7.67  | 7.78  | 6.09E-01 | 2.71E-01 | 1.69E-03 | 2.99E-02 | 7.34E-03 | 7.16E-01 |
| <i>Mf</i>      | FBgn0038294 | FBpp0291356   | Cobs_04263 | 1 | 9.06  | 9.64  | 9.01  | 9.14  | 8.53E-01 | 7.44E-01 | 4.24E-03 | 1.12E-02 | 1.84E-03 | 6.27E-01 |
| <i>RpS16</i>   | FBgn0034743 | FBpp0071766   | Cobs_04490 | 1 | 10.19 | 10.99 | 10.19 | 10.59 | 9.73E-01 | 3.42E-02 | 1.79E-04 | 4.20E-02 | 2.08E-04 | 6.98E-02 |
| <i>RpL8</i>    | FBgn0261602 | FBpp0072802   | Cobs_04644 | 1 | 9.48  | 10.39 | 9.72  | 9.87  | 3.65E-01 | 8.85E-02 | 3.19E-04 | 2.62E-02 | 4.33E-03 | 6.15E-01 |
| <i>Pdk</i>     | FBgn0017558 | FBpp0111805   | Cobs_04653 | 1 | 6.00  | 6.64  | 5.97  | 5.87  | 9.15E-01 | 5.79E-01 | 1.42E-03 | 3.04E-04 | 7.95E-04 | 7.36E-01 |
| <i>mmd</i>     | FBgn0259110 | FBpp0300196   | Cobs_04673 | 1 | 6.53  | 7.21  | 6.32  | 6.63  | 3.24E-01 | 6.76E-01 | 1.02E-03 | 3.67E-03 | 5.28E-05 | 1.59E-01 |
| NA             | NA          | No hits found | Cobs_04682 | 0 | 3.16  | 3.86  | 2.97  | 3.44  | 5.25E-01 | 1.24E-01 | 8.36E-04 | 4.95E-02 | 1.04E-04 | 4.14E-02 |
| NA             | NA          | No hits found | Cobs_04700 | 0 | 6.19  | 10.80 | 8.07  | 4.98  | 1.47E-01 | 3.29E-01 | 4.74E-04 | 7.66E-05 | 2.35E-02 | 2.64E-02 |
| <i>RpL10Ab</i> | FBgn0036213 | FBpp0075764   | Cobs_04766 | 1 | 10.03 | 11.02 | 10.08 | 10.46 | 8.49E-01 | 6.43E-02 | 1.73E-04 | 2.17E-02 | 3.35E-04 | 1.65E-01 |
| <i>CG3776</i>  | FBgn0035088 | FBpp0072302   | Cobs_04768 | 1 | 2.97  | 1.94  | 2.83  | 3.01  | 7.81E-01 | 8.99E-01 | 1.16E-02 | 8.33E-03 | 2.02E-02 | 7.12E-01 |
| <i>Fen1</i>    | FBgn0025832 | FBpp0086223   | Cobs_04776 | 1 | 4.45  | 3.48  | 4.67  | 4.38  | 4.47E-01 | 8.29E-01 | 1.40E-03 | 3.19E-03 | 1.43E-04 | 3.39E-01 |
| <i>Rpd3</i>    | FBgn0015805 | FBpp0073173   | Cobs_04793 | 0 | 3.96  | 3.42  | 3.92  | 4.06  | 8.38E-01 | 7.45E-01 | 1.44E-02 | 5.67E-03 | 2.11E-02 | 6.12E-01 |
| <i>klar</i>    | FBgn0001316 | FBpp0110115   | Cobs_04799 | 0 | 4.30  | 4.71  | 4.17  | 4.28  | 4.32E-01 | 9.44E-01 | 6.03E-03 | 5.30E-03 | 4.53E-04 | 5.40E-01 |
| -              | -           | FBpp0085729   | Cobs_04821 | 1 | 8.39  | 7.98  | 8.45  | 8.21  | 6.32E-01 | 7.82E-02 | 3.01E-04 | 2.85E-02 | 6.83E-05 | 3.79E-02 |
| <i>mip120</i>  | FBgn0033846 | FBpp0086789   | Cobs_04826 | 0 | 1.13  | 2.40  | 1.27  | 1.20  | 8.52E-01 | 9.19E-01 | 1.09E-02 | 1.71E-02 | 1.42E-02 | 9.48E-01 |
| <i>Sin3A</i>   | FBgn0022764 | FBpp0293225   | Cobs_04875 | 0 | 3.38  | 2.52  | 3.73  | 3.28  | 1.71E-01 | 8.03E-01 | 6.35E-03 | 1.51E-02 | 1.45E-04 | 1.18E-01 |
| <i>RpL17</i>   | FBgn0029897 | FBpp0070943   | Cobs_04930 | 1 | 9.92  | 10.92 | 10.00 | 10.32 | 7.40E-01 | 5.22E-02 | 4.15E-05 | 7.54E-03 | 1.45E-04 | 1.90E-01 |
| <i>CG9815</i>  | FBgn0034861 | FBpp0112024   | Cobs_04944 | 0 | 2.59  | 4.12  | 2.84  | 2.74  | 5.53E-01 | 7.87E-01 | 8.16E-04 | 2.58E-03 | 3.21E-03 | 8.26E-01 |
| <i>CG5928</i>  | FBgn0029836 | FBpp0070836   | Cobs_04945 | 1 | 5.25  | 6.64  | 5.75  | 5.26  | 1.17E-01 | 9.71E-01 | 2.90E-05 | 4.57E-05 | 2.06E-03 | 1.23E-01 |
| <i>CG43386</i> | FBgn0263216 | FBpp0300232   | Cobs_04948 | 0 | 5.91  | 8.06  | 6.63  | 4.81  | 1.13E-01 | 1.22E-02 | 1.49E-05 | 3.81E-07 | 1.06E-03 | 6.31E-04 |
| <i>CG32694</i> | FBgn0052694 | FBpp0298369   | Cobs_04954 | 1 | 4.79  | 6.97  | 5.53  | 4.58  | 7.13E-02 | 6.41E-01 | 2.99E-06 | 2.26E-06 | 2.24E-04 | 2.91E-02 |
| <i>spartin</i> | FBgn0037265 | FBpp0078501   | Cobs_04955 | 0 | 4.54  | 6.53  | 5.15  | 4.19  | 1.89E-01 | 5.04E-01 | 3.74E-05 | 1.80E-05 | 1.25E-03 | 5.72E-02 |
| <i>Mnn1</i>    | FBgn0031885 | FBpp0079029   | Cobs_04986 | 1 | 4.49  | 4.81  | 4.32  | 4.28  | 3.10E-01 | 2.12E-01 | 2.38E-02 | 1.04E-03 | 9.75E-04 | 9.19E-01 |
| <i>RnrL</i>    | FBgn0011703 | FBpp0079648   | Cobs_05001 | 1 | 6.52  | 6.89  | 6.55  | 6.54  | 8.81E-01 | 9.21E-01 | 1.45E-02 | 1.86E-02 | 1.97E-02 | 9.65E-01 |
| <i>Rh50</i>    | FBgn0028699 | FBpp0073210   | Cobs_05093 | 1 | 1.42  | -0.01 | 1.84  | 1.33  | 3.87E-01 | 7.84E-01 | 1.19E-02 | 2.74E-02 | 8.26E-04 | 2.63E-01 |



|                  |             |               |            |   |      |       |      |       |          |          |          |          |          |          |
|------------------|-------------|---------------|------------|---|------|-------|------|-------|----------|----------|----------|----------|----------|----------|
| <i>RpL34b</i>    | FBgn0037686 | FBpp0081528   | Cobs_05117 | 0 | 9.88 | 10.87 | 9.94 | 10.23 | 8.25E-01 | 1.00E-01 | 5.62E-05 | 5.02E-03 | 1.45E-04 | 2.47E-01 |
| <i>CG1231</i>    | FBgn0035134 | FBpp0072445   | Cobs_05148 | 1 | 4.61 | 5.15  | 4.41 | 4.58  | 3.58E-01 | 9.27E-01 | 3.20E-03 | 2.67E-03 | 1.78E-04 | 4.66E-01 |
| -                | -           | FBpp0293090   | Cobs_05213 | 0 | 6.39 | 7.04  | 6.10 | 5.86  | 3.09E-01 | 3.60E-02 | 1.29E-02 | 7.66E-05 | 5.40E-04 | 4.37E-01 |
| <i>CG32944</i>   | FBgn0052944 | FBpp0288688   | Cobs_05249 | 1 | 2.69 | 3.68  | 2.64 | 2.90  | 9.10E-01 | 4.97E-01 | 4.74E-04 | 4.28E-03 | 2.37E-04 | 4.55E-01 |
| <i>cta</i>       | FBgn0000384 | FBpp0110418   | Cobs_05259 | 0 | 3.24 | 4.00  | 2.81 | 3.25  | 3.99E-01 | 8.86E-01 | 2.85E-02 | 4.97E-02 | 2.07E-03 | 3.46E-01 |
| <i>CG43340</i>   | FBgn0263077 | FBpp0297790   | Cobs_05260 | 1 | 7.10 | 7.99  | 7.30 | 7.28  | 5.24E-01 | 5.44E-01 | 1.26E-03 | 7.31E-03 | 7.61E-03 | 9.67E-01 |
| <i>NA</i>        | NA          | No hits found | Cobs_05265 | 0 | 2.68 | 3.39  | 2.78 | 2.72  | 7.39E-01 | 8.32E-01 | 8.39E-03 | 1.94E-02 | 1.74E-02 | 9.36E-01 |
| <i>CG34160</i>   | FBgn0250826 | FBpp0111266   | Cobs_05267 | 0 | 2.18 | 1.09  | 2.07 | 2.18  | 9.30E-01 | 9.16E-01 | 1.95E-02 | 1.51E-02 | 2.04E-02 | 8.70E-01 |
| <i>CG42668</i>   | FBgn0261550 | FBpp0291810   | Cobs_05349 | 1 | 6.24 | 6.70  | 6.40 | 6.23  | 3.45E-01 | 9.61E-01 | 2.82E-03 | 2.48E-03 | 3.60E-02 | 3.43E-01 |
| <i>mxt</i>       | FBgn0031637 | FBpp0290163   | Cobs_05368 | 0 | 2.04 | 3.64  | 2.67 | 2.61  | 2.69E-01 | 3.12E-01 | 1.36E-03 | 2.02E-02 | 1.81E-02 | 9.36E-01 |
| <i>CG8149</i>    | FBgn0037700 | FBpp0081539   | Cobs_05380 | 1 | 4.91 | 4.36  | 4.92 | 4.88  | 9.66E-01 | 8.86E-01 | 6.68E-03 | 1.14E-02 | 4.41E-03 | 8.73E-01 |
| <i>geminin</i>   | FBgn0033081 | FBpp0085480   | Cobs_05433 | 0 | 4.84 | 4.13  | 5.03 | 4.73  | 4.10E-01 | 7.09E-01 | 3.80E-03 | 1.26E-02 | 2.89E-04 | 2.37E-01 |
| <i>CG6015</i>    | FBgn0038927 | FBpp0083581   | Cobs_05566 | 1 | 7.06 | 8.53  | 7.30 | 7.38  | 5.98E-01 | 4.35E-01 | 4.77E-04 | 4.41E-03 | 2.24E-03 | 8.98E-01 |
| <i>levy</i>      | FBgn0034877 | FBpp0071970   | Cobs_05658 | 0 | 4.19 | 3.49  | 5.02 | 4.86  | 6.41E-03 | 1.83E-02 | 3.54E-02 | 1.27E-04 | 2.31E-05 | 6.22E-01 |
| <i>CG5794</i>    | FBgn0039214 | FBpp0297302   | Cobs_05710 | 1 | 8.34 | 8.01  | 8.32 | 8.25  | 8.96E-01 | 4.82E-01 | 5.23E-03 | 3.41E-02 | 6.92E-03 | 6.64E-01 |
| <i>Art1</i>      | FBgn0037834 | FBpp0081780   | Cobs_05714 | 1 | 6.61 | 5.85  | 6.68 | 6.57  | 8.71E-01 | 9.12E-01 | 1.67E-02 | 2.24E-02 | 7.61E-03 | 8.06E-01 |
| <i>Prosalph3</i> | FBgn0261394 | FBpp0071451   | Cobs_05726 | 1 | 6.54 | 5.94  | 6.68 | 6.76  | 5.10E-01 | 2.41E-01 | 1.83E-03 | 9.70E-05 | 2.18E-04 | 7.63E-01 |
| <i>TwdlE</i>     | FBgn0031957 | FBpp0079185   | Cobs_05757 | 0 | 4.87 | 6.56  | 5.35 | 4.37  | 3.77E-01 | 3.19E-01 | 6.52E-04 | 7.86E-05 | 6.39E-03 | 7.28E-02 |
| <i>wal</i>       | FBgn0010516 | FBpp0087187   | Cobs_05759 | 1 | 7.41 | 6.91  | 7.57 | 7.82  | 5.03E-01 | 5.05E-02 | 1.86E-02 | 1.25E-04 | 2.01E-03 | 3.32E-01 |
| <i>Cchl</i>      | FBgn0038925 | FBpp0083583   | Cobs_05779 | 1 | 4.35 | 3.74  | 4.71 | 4.37  | 1.80E-01 | 9.36E-01 | 3.78E-02 | 2.93E-02 | 7.99E-04 | 2.52E-01 |
| <i>CG13643</i>   | FBgn0040601 | FBpp0297710   | Cobs_05782 | 1 | 8.32 | 9.29  | 8.46 | 8.10  | 7.34E-01 | 5.48E-01 | 3.91E-03 | 6.83E-04 | 1.01E-02 | 3.53E-01 |
| <i>CG14984</i>   | FBgn0035480 | FBpp0288663   | Cobs_05820 | 1 | 4.16 | 5.06  | 3.79 | 4.04  | 3.45E-01 | 8.01E-01 | 4.06E-03 | 2.16E-03 | 2.16E-04 | 5.81E-01 |
| <i>Cypl</i>      | FBgn0035141 | FBpp0072463   | Cobs_05875 | 1 | 4.61 | 3.85  | 4.53 | 4.89  | 7.76E-01 | 2.07E-01 | 1.97E-03 | 1.01E-04 | 3.80E-03 | 1.41E-01 |
| <i>RpL11</i>     | FBgn0013325 | FBpp0085717   | Cobs_05892 | 1 | 8.88 | 9.91  | 9.07 | 9.37  | 5.24E-01 | 4.65E-02 | 2.14E-04 | 3.59E-02 | 1.43E-03 | 3.02E-01 |
| <i>NA</i>        | NA          | No hits found | Cobs_05898 | 0 | 9.01 | 10.69 | 9.28 | 9.80  | 2.20E-01 | 2.58E-04 | 1.56E-08 | 1.27E-04 | 4.98E-07 | 2.31E-02 |
| <i>RpS14a</i>    | FBgn0004403 | FBpp0071051   | Cobs_06020 | 0 | 9.72 | 10.40 | 9.63 | 9.94  | 6.69E-01 | 2.05E-01 | 2.88E-04 | 8.70E-03 | 7.38E-05 | 1.07E-01 |
| <i>nero</i>      | FBgn0261479 | FBpp0085222   | Cobs_06070 | 1 | 3.60 | 2.80  | 4.10 | 3.54  | 1.06E-01 | 8.33E-01 | 2.35E-02 | 4.51E-02 | 2.65E-04 | 7.76E-02 |
| -                | -           | FBpp0289818   | Cobs_06079 | 0 | 6.86 | 7.79  | 7.18 | 7.09  | 3.71E-01 | 5.04E-01 | 4.09E-03 | 2.55E-02 | 4.56E-02 | 8.61E-01 |
| <i>Dgk</i>       | FBgn0085390 | FBpp0111492   | Cobs_06082 | 1 | 3.66 | 4.14  | 3.29 | 3.53  | 7.31E-02 | 6.25E-01 | 1.32E-02 | 3.59E-03 | 7.16E-05 | 2.50E-01 |

|                  |             |             |            |   |       |       |       |       |          |          |          |          |          |          |
|------------------|-------------|-------------|------------|---|-------|-------|-------|-------|----------|----------|----------|----------|----------|----------|
| <i>CG7903</i>    | FBgn0039730 | FBpp0084973 | Cobs_06090 | 1 | 8.46  | 7.85  | 8.31  | 8.26  | 4.05E-01 | 2.23E-01 | 3.09E-04 | 8.43E-03 | 3.36E-03 | 8.47E-01 |
| <i>RnrL</i>      | FBgn0011703 | FBpp0079648 | Cobs_06095 | 0 | 4.87  | 3.45  | 4.74  | 4.62  | 7.95E-01 | 5.56E-01 | 1.97E-03 | 1.07E-02 | 3.46E-03 | 8.26E-01 |
| <i>Mcm2</i>      | FBgn0014861 | FBpp0081317 | Cobs_06137 | 1 | 6.49  | 5.38  | 6.15  | 6.13  | 3.05E-01 | 2.26E-01 | 6.60E-04 | 1.60E-02 | 1.05E-02 | 9.52E-01 |
| <i>RpS4</i>      | FBgn0011284 | FBpp0075619 | Cobs_06161 | 1 | 10.61 | 11.49 | 10.54 | 10.91 | 7.90E-01 | 9.52E-02 | 2.90E-05 | 2.56E-03 | 1.62E-05 | 7.43E-02 |
| <i>CG5516</i>    | FBgn0038389 | FBpp0291705 | Cobs_06164 | 1 | 3.52  | 2.89  | 3.57  | 3.39  | 7.73E-01 | 5.43E-01 | 2.20E-03 | 1.40E-02 | 6.78E-04 | 3.81E-01 |
| <i>CG9518</i>    | FBgn0030590 | FBpp0073800 | Cobs_06210 | 1 | 4.29  | 6.61  | 4.39  | 4.43  | 9.22E-01 | 8.25E-01 | 2.51E-05 | 8.71E-05 | 3.39E-05 | 9.27E-01 |
| <i>CG18599</i>   | FBgn0038592 | FBpp0082993 | Cobs_06252 | 1 | 0.41  | 1.79  | 0.32  | 1.01  | 8.28E-01 | 1.45E-01 | 7.97E-04 | 3.67E-02 | 2.89E-04 | 1.16E-01 |
| <i>CG33986</i>   | FBgn0053986 | FBpp0293993 | Cobs_06263 | 0 | 4.93  | 11.07 | 6.39  | 7.19  | 3.65E-01 | 1.08E-01 | 1.40E-04 | 6.42E-03 | 1.19E-03 | 6.49E-01 |
| <i>CG13188</i>   | FBgn0033668 | FBpp0087146 | Cobs_06466 | 1 | 5.95  | 6.88  | 5.73  | 5.45  | 4.46E-01 | 5.14E-02 | 7.81E-04 | 1.00E-05 | 7.16E-05 | 3.65E-01 |
| <i>Atf-2</i>     | FBgn0265193 | FBpp0072289 | Cobs_06490 | 1 | 6.01  | 6.69  | 6.06  | 6.00  | 8.07E-01 | 9.79E-01 | 3.08E-04 | 3.30E-04 | 6.33E-04 | 8.15E-01 |
| <i>CG18641</i>   | FBgn0031426 | FBpp0297922 | Cobs_06497 | 1 | 4.54  | 5.87  | 4.41  | 3.65  | 7.53E-01 | 9.94E-03 | 5.07E-05 | 5.66E-07 | 2.31E-05 | 4.67E-02 |
| <i>7B2</i>       | FBgn0041707 | FBpp0078435 | Cobs_06501 | 1 | 5.15  | 6.07  | 4.98  | 5.45  | 4.50E-01 | 1.71E-01 | 7.74E-05 | 3.84E-03 | 1.22E-05 | 4.36E-02 |
| <i>Syt1</i>      | FBgn0004242 | FBpp0077410 | Cobs_06502 | 1 | 5.14  | 5.72  | 5.04  | 5.24  | 6.78E-01 | 5.88E-01 | 2.80E-03 | 1.43E-02 | 6.00E-04 | 3.45E-01 |
| <i>RpL6</i>      | FBgn0039857 | FBpp0085166 | Cobs_06510 | 1 | 10.02 | 10.97 | 10.32 | 10.49 | 1.87E-01 | 2.03E-02 | 5.07E-05 | 2.32E-02 | 2.41E-03 | 5.00E-01 |
| <i>Tctp</i>      | FBgn0037874 | FBpp0081820 | Cobs_06516 | 1 | 8.72  | 10.35 | 9.22  | 9.37  | 1.45E-01 | 3.58E-02 | 1.49E-05 | 3.35E-03 | 8.39E-04 | 7.40E-01 |
| <i>CG3860</i>    | FBgn0034951 | FBpp0072110 | Cobs_06527 | 1 | 4.81  | 5.21  | 4.63  | 4.80  | 4.28E-01 | 9.57E-01 | 4.02E-02 | 4.79E-02 | 3.15E-03 | 4.28E-01 |
| <i>dgt3</i>      | FBgn0034569 | FBpp0271922 | Cobs_06571 | 0 | 5.49  | 4.72  | 5.67  | 5.23  | 4.62E-01 | 2.41E-01 | 1.24E-03 | 2.74E-02 | 1.27E-04 | 6.85E-02 |
| <i>lpk1</i>      | FBgn0050295 | FBpp0112280 | Cobs_06576 | 1 | 4.77  | 5.17  | 4.55  | 4.47  | 1.72E-01 | 6.67E-02 | 1.67E-02 | 1.69E-04 | 2.79E-04 | 7.96E-01 |
| <i>Rcc1</i>      | FBgn0002638 | FBpp0076784 | Cobs_06589 | 1 | 5.41  | 4.30  | 5.47  | 5.60  | 8.79E-01 | 6.46E-01 | 4.13E-03 | 1.17E-03 | 1.92E-03 | 8.30E-01 |
| <i>l(2)35Bd</i>  | FBgn0001974 | FBpp0080257 | Cobs_06615 | 0 | 2.70  | 1.74  | 3.06  | 2.75  | 3.59E-01 | 8.60E-01 | 4.36E-02 | 2.72E-02 | 3.09E-03 | 5.50E-01 |
| <i>krz</i>       | FBgn0040206 | FBpp0293792 | Cobs_06617 | 1 | 6.64  | 7.04  | 6.49  | 6.47  | 4.82E-01 | 3.74E-01 | 2.63E-02 | 2.32E-03 | 2.61E-03 | 9.36E-01 |
| <i>aub</i>       | FBgn0000146 | FBpp0111705 | Cobs_06687 | 1 | 5.35  | 2.45  | 5.48  | 3.46  | 4.82E-01 | 5.40E-09 | 5.25E-12 | 7.49E-04 | 1.26E-12 | 7.32E-10 |
| <i>sta</i>       | FBgn0003517 | FBpp0070278 | Cobs_06701 | 1 | 11.18 | 11.99 | 11.20 | 11.43 | 9.31E-01 | 1.92E-01 | 1.35E-04 | 4.77E-03 | 1.96E-04 | 3.10E-01 |
| -                | -           | FBpp0099589 | Cobs_06711 | 1 | 7.66  | 7.94  | 7.57  | 7.60  | 4.75E-01 | 5.81E-01 | 1.22E-02 | 2.29E-03 | 1.16E-03 | 9.00E-01 |
| <i>Atg1</i>      | FBgn0260945 | FBpp0075677 | Cobs_06720 | 1 | 7.47  | 7.92  | 7.45  | 7.50  | 9.43E-01 | 8.80E-01 | 1.31E-03 | 2.23E-03 | 8.61E-04 | 8.45E-01 |
| <i>Prosbeta4</i> | FBgn0032596 | FBpp0080490 | Cobs_06858 | 1 | 5.46  | 4.75  | 5.82  | 6.09  | 1.85E-01 | 1.39E-02 | 1.21E-02 | 3.44E-05 | 2.45E-04 | 3.95E-01 |
| <i>obst-E</i>    | FBgn0031737 | FBpp0078794 | Cobs_06870 | 1 | 7.59  | 8.57  | 7.31  | 6.24  | 5.45E-01 | 9.26E-04 | 1.49E-02 | 4.42E-06 | 1.90E-03 | 1.50E-02 |
| <i>CG43164</i>   | FBgn0262720 | FBpp0296984 | Cobs_07051 | 1 | 9.03  | 6.92  | 8.44  | 7.57  | 8.37E-02 | 4.00E-05 | 5.11E-07 | 3.44E-02 | 2.68E-05 | 1.37E-02 |
| -                | -           | FBpp0293667 | Cobs_07055 | 0 | 5.73  | 3.74  | 5.15  | 5.83  | 2.87E-01 | 8.38E-01 | 5.74E-04 | 3.49E-04 | 8.08E-03 | 2.10E-01 |

|                      |             |             |            |   |       |       |      |      |          |          |          |          |          |          |
|----------------------|-------------|-------------|------------|---|-------|-------|------|------|----------|----------|----------|----------|----------|----------|
| <i>His1:CG33843</i>  | FBgn0053843 | FBpp0091089 | Cobs_07056 | 0 | 9.50  | 8.24  | 9.82 | 9.48 | 4.62E-01 | 9.57E-01 | 1.59E-03 | 1.94E-03 | 1.66E-04 | 4.51E-01 |
| <i>CG40470</i>       | FBgn0058470 | FBpp0110455 | Cobs_07075 | 1 | 7.77  | 8.71  | 7.48 | 7.55 | 3.07E-01 | 4.31E-01 | 4.67E-04 | 6.69E-05 | 2.64E-05 | 8.45E-01 |
| <i>tsu</i>           | FBgn0033378 | FBpp0087648 | Cobs_07095 | 1 | 5.67  | 5.22  | 5.81 | 6.09 | 4.94E-01 | 1.88E-02 | 1.66E-02 | 5.41E-05 | 1.71E-03 | 1.75E-01 |
| <i>Rpt5</i>          | FBgn0028684 | FBpp0083843 | Cobs_07096 | 1 | 7.14  | 6.62  | 7.29 | 7.55 | 5.68E-01 | 5.50E-02 | 1.82E-02 | 1.29E-04 | 2.58E-03 | 2.99E-01 |
| <i>CG32791</i>       | FBgn0052791 | FBpp0070563 | Cobs_07133 | 1 | 0.96  | 2.00  | 0.67 | 0.61 | 6.15E-01 | 5.40E-01 | 9.11E-03 | 2.06E-03 | 1.51E-03 | 9.51E-01 |
| <i>His2A:CG33817</i> | FBgn0053817 | FBpp0091063 | Cobs_07283 | 0 | 10.14 | 9.09  | 9.73 | 9.85 | 1.75E-01 | 3.24E-01 | 4.57E-04 | 6.73E-03 | 1.96E-02 | 7.51E-01 |
| <i>CG43078</i>       | FBgn0262508 | FBpp0293353 | Cobs_07309 | 1 | 6.28  | 6.94  | 6.53 | 6.30 | 2.78E-01 | 9.28E-01 | 2.43E-03 | 3.42E-03 | 4.51E-02 | 3.61E-01 |
| <i>dup</i>           | FBgn0000996 | FBpp0086519 | Cobs_07325 | 1 | 6.00  | 4.64  | 5.87 | 5.56 | 7.97E-01 | 2.73E-01 | 1.56E-03 | 2.70E-02 | 2.97E-03 | 5.27E-01 |
| <i>CG5630</i>        | FBgn0038842 | FBpp0083383 | Cobs_07363 | 1 | 6.25  | 7.28  | 6.24 | 6.16 | 9.86E-01 | 8.31E-01 | 5.99E-03 | 2.97E-03 | 4.48E-03 | 8.73E-01 |
| <i>SrpRbeta</i>      | FBgn0011509 | FBpp0076325 | Cobs_07371 | 1 | 4.38  | 3.87  | 4.43 | 4.60 | 8.62E-01 | 3.80E-01 | 2.57E-02 | 2.62E-03 | 1.11E-02 | 5.87E-01 |
| <i>CG10889</i>       | FBgn0038769 | FBpp0083248 | Cobs_07509 | 0 | 4.10  | 4.66  | 4.01 | 3.81 | 6.31E-01 | 1.32E-01 | 5.59E-03 | 1.41E-04 | 9.01E-04 | 4.23E-01 |
| <i>Incenp</i>        | FBgn0260991 | FBpp0088035 | Cobs_07558 | 1 | 6.31  | 4.90  | 6.18 | 5.69 | 5.34E-01 | 1.62E-03 | 2.50E-07 | 4.02E-04 | 9.38E-07 | 2.43E-02 |
| <i>CG31148</i>       | FBgn0051148 | FBpp0083833 | Cobs_07585 | 1 | 6.35  | 7.87  | 6.34 | 6.42 | 9.92E-01 | 9.52E-01 | 1.83E-02 | 2.09E-02 | 1.42E-02 | 9.54E-01 |
| <i>CG7627</i>        | FBgn0032026 | FBpp0297935 | Cobs_07607 | 0 | 3.01  | 1.97  | 3.07 | 3.19 | 8.18E-01 | 5.37E-01 | 5.05E-03 | 1.14E-03 | 1.85E-03 | 7.85E-01 |
| <i>Mulk</i>          | FBgn0260750 | FBpp0079576 | Cobs_07661 | 1 | 3.39  | 2.63  | 3.60 | 3.32 | 4.26E-01 | 8.95E-01 | 1.45E-02 | 2.34E-02 | 1.20E-03 | 3.75E-01 |
| <i>CG5205</i>        | FBgn0038344 | FBpp0082601 | Cobs_07697 | 1 | 7.17  | 6.50  | 7.37 | 6.94 | 4.29E-01 | 3.40E-01 | 4.16E-03 | 4.86E-02 | 3.37E-04 | 9.19E-02 |
| <i>CG10657</i>       | FBgn0036289 | FBpp0075707 | Cobs_07712 | 1 | 5.57  | 6.54  | 5.03 | 4.84 | 1.22E-01 | 2.35E-02 | 2.52E-03 | 1.69E-05 | 3.30E-05 | 6.55E-01 |
| <i>CG31743</i>       | FBgn0032618 | FBpp0080500 | Cobs_07841 | 1 | 5.03  | 5.86  | 4.86 | 5.12 | 5.31E-01 | 8.04E-01 | 8.80E-04 | 2.26E-03 | 1.14E-04 | 3.82E-01 |
| <i>unc-5</i>         | FBgn0034013 | FBpp0086514 | Cobs_07861 | 0 | 4.42  | 4.97  | 4.07 | 4.41 | 1.44E-01 | 9.69E-01 | 1.02E-02 | 1.24E-02 | 1.40E-04 | 1.54E-01 |
| <i>nudC</i>          | FBgn0021768 | FBpp0297079 | Cobs_07866 | 0 | 4.36  | 3.74  | 4.46 | 4.36 | 7.47E-01 | 9.57E-01 | 2.31E-02 | 2.74E-02 | 6.42E-03 | 7.40E-01 |
| <i>CG4882</i>        | FBgn0025336 | FBpp0072134 | Cobs_07934 | 1 | 4.75  | 4.15  | 5.01 | 5.11 | 2.47E-01 | 8.31E-02 | 1.04E-02 | 1.41E-04 | 3.10E-04 | 7.44E-01 |
| <i>CG1440</i>        | FBgn0030038 | FBpp0071144 | Cobs_07935 | 1 | 4.65  | 4.09  | 4.91 | 4.73 | 3.10E-01 | 8.17E-01 | 2.79E-02 | 1.34E-02 | 1.24E-03 | 5.13E-01 |
| -                    | -           | FBpp0076126 | Cobs_08142 | 1 | 4.67  | 5.50  | 4.12 | 4.61 | 2.40E-02 | 8.70E-01 | 2.87E-04 | 2.20E-04 | 9.38E-07 | 4.68E-02 |
| <i>RAF2</i>          | FBgn0036624 | FBpp0075145 | Cobs_08146 | 1 | 5.97  | 6.35  | 5.87 | 5.79 | 4.62E-01 | 1.86E-01 | 4.70E-03 | 1.49E-04 | 4.14E-04 | 7.17E-01 |
| <i>CG42613</i>       | FBgn0261262 | FBpp0293231 | Cobs_08163 | 1 | 5.20  | 5.63  | 4.86 | 5.21 | 1.16E-01 | 9.14E-01 | 2.65E-02 | 3.72E-02 | 2.54E-04 | 1.04E-01 |
| <i>CG3618</i>        | FBgn0037028 | FBpp0292073 | Cobs_08170 | 1 | 4.04  | 4.50  | 4.11 | 4.10 | 7.47E-01 | 7.15E-01 | 1.43E-02 | 4.37E-02 | 2.98E-02 | 9.83E-01 |
| <i>CG10948</i>       | FBgn0036317 | FBpp0271745 | Cobs_08192 | 1 | 6.67  | 7.47  | 6.64 | 6.72 | 9.28E-01 | 8.94E-01 | 5.31E-03 | 8.23E-03 | 3.09E-03 | 8.42E-01 |
| <i>PpV</i>           | FBgn0003139 | FBpp0070883 | Cobs_08193 | 1 | 5.55  | 5.16  | 5.70 | 5.77 | 3.68E-01 | 1.77E-01 | 1.70E-02 | 5.35E-04 | 9.85E-04 | 8.05E-01 |
| <i>RpS18</i>         | FBgn0010411 | FBpp0085586 | Cobs_08275 | 1 | 9.58  | 10.17 | 9.12 | 9.65 | 2.09E-02 | 6.97E-01 | 1.82E-03 | 5.88E-03 | 3.43E-06 | 9.11E-03 |

|                      |             |             |            |   |       |       |       |       |          |          |          |          |          |          |
|----------------------|-------------|-------------|------------|---|-------|-------|-------|-------|----------|----------|----------|----------|----------|----------|
| <i>Fur2</i>          | FBgn0004598 | FBpp0290516 | Cobs_08312 | 0 | 7.31  | 8.13  | 7.54  | 7.65  | 1.85E-01 | 3.50E-02 | 2.04E-05 | 4.90E-03 | 8.31E-04 | 6.38E-01 |
| <i>RSG7</i>          | FBgn0024941 | FBpp0300193 | Cobs_08315 | 1 | 8.80  | 9.93  | 9.19  | 9.21  | 1.17E-01 | 6.60E-02 | 2.11E-05 | 2.70E-03 | 1.75E-03 | 9.46E-01 |
| -                    | -           | FBpp0099473 | Cobs_08353 | 1 | 4.47  | 5.06  | 4.43  | 4.37  | 8.81E-01 | 8.44E-01 | 2.64E-02 | 1.47E-02 | 1.21E-02 | 9.75E-01 |
| <i>CG31961</i>       | FBgn0051961 | FBpp0077174 | Cobs_08385 | 1 | 6.28  | 6.93  | 6.55  | 6.51  | 1.74E-01 | 2.20E-01 | 6.17E-04 | 1.62E-02 | 2.47E-02 | 8.89E-01 |
| <i>CycG</i>          | FBgn0039858 | FBpp0085164 | Cobs_08393 | 1 | 6.63  | 7.21  | 6.50  | 6.50  | 6.59E-01 | 6.35E-01 | 1.53E-02 | 3.59E-03 | 3.02E-03 | 9.96E-01 |
| <i>mRpL48</i>        | FBgn0031357 | FBpp0077550 | Cobs_08400 | 1 | 3.76  | 3.09  | 3.98  | 4.31  | 3.69E-01 | 1.63E-02 | 1.22E-02 | 4.93E-05 | 7.47E-04 | 2.20E-01 |
| <i>CG3036</i>        | FBgn0031645 | FBpp0077083 | Cobs_08418 | 1 | 3.50  | 4.84  | 3.82  | 3.77  | 7.01E-01 | 7.11E-01 | 8.93E-03 | 2.71E-02 | 1.96E-02 | 9.93E-01 |
| <i>RpL21</i>         | FBgn0032987 | FBpp0085314 | Cobs_08471 | 0 | 7.14  | 6.56  | 7.20  | 7.75  | 8.47E-01 | 6.65E-03 | 1.19E-02 | 1.66E-05 | 4.89E-03 | 2.89E-02 |
| <i>eIF3-S9</i>       | FBgn0034237 | FBpp0086098 | Cobs_08527 | 1 | 8.20  | 7.74  | 8.31  | 8.56  | 6.68E-01 | 8.69E-02 | 2.85E-02 | 3.33E-04 | 6.07E-03 | 3.22E-01 |
| <i>CG7718</i>        | FBgn0038649 | FBpp0083097 | Cobs_08533 | 1 | 5.79  | 5.36  | 5.80  | 5.97  | 9.56E-01 | 4.23E-01 | 4.69E-02 | 5.44E-03 | 3.20E-02 | 5.38E-01 |
| <i>Lip4</i>          | FBgn0032264 | FBpp0079682 | Cobs_08563 | 0 | 3.97  | 6.41  | 3.74  | 2.23  | 6.08E-01 | 3.76E-03 | 7.53E-06 | 3.81E-07 | 1.80E-06 | 2.98E-02 |
| <i>chinmo</i>        | FBgn0086758 | FBpp0292933 | Cobs_08588 | 0 | 4.54  | 5.69  | 4.40  | 4.97  | 6.67E-01 | 8.44E-02 | 4.87E-05 | 5.73E-03 | 1.62E-05 | 4.36E-02 |
| <i>chinmo</i>        | FBgn0086758 | FBpp0292934 | Cobs_08589 | 0 | 1.94  | 3.03  | 1.55  | 2.37  | 3.19E-01 | 2.07E-01 | 1.69E-03 | 4.94E-02 | 8.65E-05 | 3.34E-02 |
| <i>Pdh</i>           | FBgn0011693 | FBpp0113028 | Cobs_08610 | 1 | 1.84  | 2.75  | 2.11  | 1.90  | 4.85E-01 | 9.75E-01 | 1.68E-03 | 2.42E-03 | 8.89E-03 | 5.65E-01 |
| <i>tra2</i>          | FBgn0003742 | FBpp0088561 | Cobs_08625 | 1 | 5.52  | 4.90  | 5.27  | 5.28  | 2.38E-01 | 2.32E-01 | 2.15E-03 | 4.86E-02 | 4.70E-02 | 9.73E-01 |
| <i>didum</i>         | FBgn0261397 | FBpp0088686 | Cobs_08641 | 1 | 6.80  | 8.10  | 7.05  | 7.21  | 5.79E-01 | 2.85E-01 | 1.03E-03 | 1.70E-02 | 4.82E-03 | 7.60E-01 |
| <i>Spred</i>         | FBgn0020767 | FBpp0086597 | Cobs_08656 | 1 | 7.08  | 6.70  | 7.17  | 6.93  | 4.98E-01 | 2.15E-01 | 1.69E-03 | 4.21E-02 | 1.98E-04 | 6.74E-02 |
| <i>vanin-like</i>    | FBgn0040069 | FBpp0070844 | Cobs_08723 | 1 | 3.69  | 3.04  | 4.04  | 3.92  | 2.67E-01 | 4.88E-01 | 3.04E-02 | 4.90E-03 | 1.13E-03 | 7.64E-01 |
| <i>RpA-70</i>        | FBgn0010173 | FBpp0081356 | Cobs_08750 | 1 | 6.21  | 5.13  | 6.01  | 5.88  | 4.22E-01 | 1.22E-01 | 2.90E-05 | 2.02E-03 | 2.90E-04 | 6.26E-01 |
| <i>CG1572</i>        | FBgn0030309 | FBpp0073389 | Cobs_08769 | 1 | 5.71  | 6.46  | 5.79  | 5.39  | 8.49E-01 | 2.74E-01 | 8.15E-03 | 4.89E-04 | 1.24E-02 | 2.30E-01 |
| <i>CG7638</i>        | FBgn0036133 | FBpp0075940 | Cobs_08806 | 1 | 5.52  | 6.01  | 5.59  | 5.53  | 7.88E-01 | 9.79E-01 | 7.51E-03 | 6.80E-03 | 1.43E-02 | 7.97E-01 |
| <i>Sod3</i>          | FBgn0033631 | FBpp0110197 | Cobs_08867 | 1 | 5.97  | 6.64  | 5.61  | 6.00  | 2.77E-01 | 9.41E-01 | 2.23E-02 | 2.70E-02 | 7.70E-04 | 2.61E-01 |
| <i>His2A:CG33817</i> | FBgn0053817 | FBpp0091063 | Cobs_08875 | 0 | 4.40  | 3.35  | 4.50  | 4.32  | 6.44E-01 | 7.87E-01 | 7.03E-05 | 2.46E-04 | 2.31E-05 | 4.69E-01 |
| <i>RpL4</i>          | FBgn0003279 | FBpp0084617 | Cobs_08879 | 1 | 10.10 | 10.67 | 10.12 | 10.30 | 8.88E-01 | 8.00E-02 | 3.12E-05 | 3.44E-03 | 6.05E-05 | 1.76E-01 |
| <i>RpL35A</i>        | FBgn0037328 | FBpp0078416 | Cobs_08905 | 1 | 10.29 | 11.20 | 10.39 | 10.55 | 6.30E-01 | 1.70E-01 | 3.43E-05 | 1.55E-03 | 1.76E-04 | 5.28E-01 |
| <i>eIF-4a</i>        | FBgn0001942 | FBpp0297911 | Cobs_08925 | 1 | 10.91 | 11.93 | 11.25 | 11.21 | 1.66E-01 | 1.89E-01 | 7.51E-05 | 3.00E-03 | 4.20E-03 | 9.12E-01 |
| <i>CG17802</i>       | FBgn0038549 | FBpp0082950 | Cobs_09081 | 0 | 6.14  | 7.28  | 6.20  | 6.62  | 8.47E-01 | 5.42E-02 | 6.24E-05 | 1.10E-02 | 1.36E-04 | 1.43E-01 |
| <i>RfC3</i>          | FBgn0032244 | FBpp0079609 | Cobs_09125 | 0 | 4.43  | 4.94  | 4.04  | 4.28  | 1.38E-01 | 5.53E-01 | 4.23E-02 | 8.61E-03 | 5.49E-04 | 4.53E-01 |
| <i>GABA-B-R1</i>     | FBgn0260446 | FBpp0293274 | Cobs_09208 | 1 | 4.27  | 4.71  | 3.93  | 4.20  | 1.51E-01 | 8.03E-01 | 4.94E-02 | 2.36E-02 | 7.33E-04 | 3.03E-01 |

|                   |             |               |            |   |       |      |      |      |          |          |          |          |          |          |
|-------------------|-------------|---------------|------------|---|-------|------|------|------|----------|----------|----------|----------|----------|----------|
| <i>CG9265</i>     | FBgn0032910 | FBpp0081035   | Cobs_09285 | 1 | 4.28  | 5.16 | 4.19 | 4.36 | 8.13E-01 | 9.21E-01 | 1.54E-02 | 2.18E-02 | 5.13E-03 | 7.62E-01 |
| <i>Prosbeta6</i>  | FBgn0002284 | FBpp0075119   | Cobs_09307 | 1 | 6.54  | 6.01 | 6.59 | 7.02 | 8.47E-01 | 2.15E-02 | 1.52E-02 | 5.41E-05 | 6.24E-03 | 7.30E-02 |
| <i>pasha</i>      | FBgn0039861 | FBpp0085181   | Cobs_09311 | 1 | 3.98  | 3.47 | 4.00 | 4.26 | 8.96E-01 | 2.14E-01 | 4.61E-02 | 2.16E-03 | 2.40E-02 | 3.50E-01 |
| <i>Vps33B</i>     | FBgn0039335 | FBpp0084210   | Cobs_09332 | 1 | 4.61  | 5.19 | 4.57 | 4.59 | 8.50E-01 | 9.27E-01 | 2.32E-02 | 1.72E-02 | 9.14E-03 | 9.37E-01 |
| <i>RN-tre</i>     | FBgn0020620 | FBpp0086730   | Cobs_09342 | 0 | 6.81  | 7.36 | 6.71 | 6.89 | 6.53E-01 | 7.00E-01 | 3.12E-03 | 1.00E-02 | 6.23E-04 | 4.02E-01 |
| <i>NA</i>         | NA          | No hits found | Cobs_09383 | 0 | 1.07  | 0.02 | 1.91 | 0.99 | 2.92E-02 | 9.62E-01 | 1.56E-02 | 1.99E-02 | 3.74E-05 | 3.57E-02 |
| <i>CG8507</i>     | FBgn0037756 | FBpp0081618   | Cobs_09518 | 1 | 5.55  | 5.13 | 5.93 | 5.53 | 4.02E-02 | 9.52E-01 | 1.58E-02 | 1.88E-02 | 4.57E-05 | 4.10E-02 |
| <i>Aats-tyr</i>   | FBgn0027080 | FBpp0075168   | Cobs_09534 | 1 | 6.37  | 5.82 | 6.35 | 6.59 | 9.63E-01 | 3.56E-01 | 1.73E-02 | 1.41E-03 | 1.63E-02 | 3.84E-01 |
| <i>faf</i>        | FBgn0005632 | FBpp0085202   | Cobs_09543 | 1 | 8.23  | 7.92 | 8.53 | 8.39 | 5.33E-02 | 2.90E-01 | 3.20E-02 | 1.84E-03 | 1.25E-04 | 4.02E-01 |
| <i>TER94</i>      | FBgn0261014 | FBpp0087479   | Cobs_09615 | 1 | 8.58  | 7.89 | 8.78 | 8.93 | 4.71E-01 | 1.56E-01 | 5.70E-03 | 1.33E-04 | 5.56E-04 | 6.60E-01 |
| <i>CG31475</i>    | FBgn0051475 | FBpp0083149   | Cobs_09626 | 1 | 2.60  | 3.94 | 2.88 | 1.42 | 4.46E-01 | 1.11E-02 | 8.83E-05 | 2.26E-06 | 6.14E-04 | 4.49E-03 |
| <i>Art3</i>       | FBgn0038306 | FBpp0082589   | Cobs_09641 | 1 | 3.95  | 3.24 | 4.05 | 4.09 | 7.47E-01 | 7.67E-01 | 2.93E-02 | 1.23E-02 | 8.35E-03 | 9.88E-01 |
| <i>AstC-R2</i>    | FBgn0036789 | FBpp0088996   | Cobs_09654 | 1 | 2.32  | 2.99 | 2.28 | 2.10 | 8.92E-01 | 6.27E-01 | 3.31E-02 | 1.01E-02 | 1.54E-02 | 7.93E-01 |
| <i>Kdm2</i>       | FBgn0037659 | FBpp0289915   | Cobs_09656 | 0 | 6.44  | 5.51 | 6.52 | 6.24 | 8.06E-01 | 4.15E-01 | 4.37E-04 | 4.53E-03 | 1.78E-04 | 3.12E-01 |
| <i>Rbf</i>        | FBgn0015799 | FBpp0070141   | Cobs_09659 | 1 | 6.76  | 5.56 | 6.98 | 6.42 | 6.22E-01 | 3.81E-01 | 2.17E-03 | 2.22E-02 | 4.05E-04 | 1.82E-01 |
| <i>NA</i>         | NA          | No hits found | Cobs_09663 | 0 | 3.91  | 6.08 | 4.25 | 4.71 | 5.62E-01 | 1.04E-01 | 1.49E-05 | 8.64E-04 | 5.43E-05 | 4.18E-01 |
| <i>CG32645</i>    | FBgn0052645 | FBpp0073556   | Cobs_09671 | 0 | 6.39  | 7.26 | 5.93 | 5.12 | 3.17E-01 | 3.21E-03 | 4.00E-02 | 2.98E-05 | 1.84E-03 | 8.86E-02 |
| <i>toc</i>        | FBgn0015600 | FBpp0077346   | Cobs_09739 | 1 | 6.32  | 7.19 | 6.19 | 6.61 | 4.75E-01 | 6.36E-02 | 6.07E-06 | 5.92E-04 | 9.38E-07 | 1.85E-02 |
| <i>NA</i>         | NA          | No hits found | Cobs_09747 | 0 | 3.39  | 4.31 | 3.36 | 3.65 | 8.95E-01 | 4.05E-01 | 7.83E-04 | 9.01E-03 | 3.50E-04 | 3.63E-01 |
| <i>betaTub56D</i> | FBgn0003887 | FBpp0085720   | Cobs_09769 | 0 | 10.09 | 8.84 | 9.64 | 9.74 | 1.77E-01 | 2.62E-01 | 1.61E-04 | 3.55E-03 | 7.26E-03 | 8.33E-01 |
| <i>NA</i>         | NA          | No hits found | Cobs_09776 | 0 | 7.83  | 6.58 | 7.37 | 7.74 | 1.58E-01 | 8.04E-01 | 1.64E-04 | 4.24E-04 | 8.48E-03 | 2.99E-01 |
| <i>Den1</i>       | FBgn0033716 | FBpp0291088   | Cobs_09804 | 1 | 3.63  | 4.00 | 3.56 | 3.46 | 7.30E-01 | 4.51E-01 | 4.41E-02 | 6.43E-03 | 1.15E-02 | 7.82E-01 |
| <i>CG4747</i>     | FBgn0043456 | FBpp0079520   | Cobs_09834 | 1 | 6.48  | 5.62 | 6.10 | 6.22 | 1.50E-01 | 3.00E-01 | 1.03E-03 | 1.62E-02 | 4.63E-02 | 7.35E-01 |
| <i>CG9646</i>     | FBgn0034184 | FBpp0086128   | Cobs_09844 | 1 | 4.33  | 4.99 | 3.84 | 4.11 | 1.93E-02 | 2.88E-01 | 8.70E-04 | 7.92E-05 | 1.62E-06 | 2.21E-01 |
| <i>NA</i>         | NA          | No hits found | Cobs_09899 | 0 | 3.47  | 4.18 | 3.31 | 3.39 | 5.59E-01 | 7.74E-01 | 1.29E-02 | 5.84E-03 | 1.60E-03 | 8.43E-01 |
| <i>CG42382</i>    | FBgn0259728 | FBpp0289271   | Cobs_09902 | 1 | 4.57  | 5.29 | 4.32 | 4.47 | 3.58E-01 | 8.03E-01 | 3.35E-03 | 1.73E-03 | 1.87E-04 | 5.93E-01 |
| <i>Prp19</i>      | FBgn0261119 | FBpp0085902   | Cobs_09918 | 1 | 6.61  | 5.88 | 6.63 | 6.52 | 9.69E-01 | 7.84E-01 | 1.11E-02 | 2.43E-02 | 7.61E-03 | 7.86E-01 |
| <i>l(1)G0222</i>  | FBgn0028343 | FBpp0290629   | Cobs_09931 | 1 | 4.34  | 4.79 | 4.48 | 4.47 | 4.26E-01 | 4.19E-01 | 3.31E-03 | 3.21E-02 | 2.55E-02 | 9.94E-01 |
| -                 | -           | FBpp0071228   | Cobs_09953 | 1 | 7.92  | 7.13 | 7.95 | 8.22 | 9.58E-01 | 3.25E-01 | 7.23E-03 | 4.92E-04 | 4.82E-03 | 4.34E-01 |

|                       |             |               |            |   |      |       |       |       |          |          |          |          |          |          |
|-----------------------|-------------|---------------|------------|---|------|-------|-------|-------|----------|----------|----------|----------|----------|----------|
| <i>unc79</i>          | FBgn0038693 | FBpp0290906   | Cobs_09956 | 1 | 5.01 | 5.87  | 4.94  | 5.18  | 7.97E-01 | 5.07E-01 | 5.23E-04 | 3.98E-03 | 1.87E-04 | 3.69E-01 |
| <i>Lip4</i>           | FBgn0032264 | FBpp0079682   | Cobs_10062 | 1 | 8.97 | 11.37 | 9.13  | 9.05  | 8.96E-01 | 9.51E-01 | 7.44E-03 | 8.61E-03 | 9.73E-03 | 9.53E-01 |
| <i>CG4291</i>         | FBgn0031287 | FBpp0077698   | Cobs_10069 | 0 | 6.16 | 6.56  | 6.19  | 6.18  | 9.19E-01 | 9.11E-01 | 2.11E-02 | 2.85E-02 | 2.44E-02 | 9.97E-01 |
| <i>CG5525</i>         | FBgn0032444 | FBpp0079992   | Cobs_10092 | 1 | 7.55 | 6.85  | 7.60  | 7.59  | 8.96E-01 | 9.01E-01 | 4.51E-03 | 2.80E-03 | 2.35E-03 | 9.94E-01 |
| <i>CG15279</i>        | FBgn0028886 | FBpp0290069   | Cobs_10107 | 1 | 3.35 | 1.61  | 3.02  | 2.42  | 1.99E-01 | 1.06E-03 | 2.99E-06 | 1.25E-02 | 4.56E-05 | 5.35E-02 |
| <i>nudE</i>           | FBgn0036059 | FBpp0112071   | Cobs_10115 | 1 | 5.81 | 6.49  | 5.96  | 6.03  | 6.03E-01 | 3.69E-01 | 4.46E-03 | 4.73E-02 | 1.78E-02 | 8.27E-01 |
| <i>DNApol-alpha50</i> | FBgn0011762 | FBpp0076330   | Cobs_10137 | 1 | 1.96 | 0.78  | 1.47  | 1.63  | 1.70E-01 | 2.85E-01 | 1.53E-03 | 2.62E-02 | 4.51E-02 | 8.23E-01 |
| <i>rept</i>           | FBgn0040075 | FBpp0074756   | Cobs_10229 | 1 | 6.40 | 5.66  | 6.39  | 6.27  | 9.73E-01 | 6.65E-01 | 1.01E-02 | 3.35E-02 | 9.08E-03 | 7.49E-01 |
| <i>l(1)G0148</i>      | FBgn0028360 | FBpp0070911   | Cobs_10237 | 1 | 4.91 | 3.82  | 5.03  | 4.78  | 7.77E-01 | 7.18E-01 | 6.51E-03 | 1.89E-02 | 2.08E-03 | 5.34E-01 |
| <i>CG31064</i>        | FBgn0051064 | FBpp0084495   | Cobs_10258 | 0 | 4.89 | 5.58  | 4.92  | 4.92  | 9.57E-01 | 9.53E-01 | 6.11E-03 | 7.95E-03 | 5.63E-03 | 9.99E-01 |
| -                     | -           | FBpp0110535   | Cobs_10274 | 1 | 4.48 | 3.75  | 4.50  | 4.49  | 9.48E-01 | 9.77E-01 | 4.71E-03 | 5.61E-03 | 2.81E-03 | 9.36E-01 |
| <i>w</i>              | FBgn0003996 | FBpp0070468   | Cobs_10276 | 1 | 6.26 | 8.13  | 6.67  | 6.21  | 3.61E-01 | 9.15E-01 | 3.26E-05 | 4.03E-05 | 4.66E-04 | 3.24E-01 |
| <i>NA</i>             | NA          | No hits found | Cobs_10280 | 0 | 3.23 | 5.31  | 3.69  | 2.89  | 4.47E-01 | 5.10E-01 | 2.98E-05 | 1.86E-05 | 1.74E-04 | 1.65E-01 |
| <i>Ndc1</i>           | FBgn0039125 | FBpp0083879   | Cobs_10309 | 1 | 5.11 | 4.04  | 4.99  | 4.84  | 8.06E-01 | 4.65E-01 | 5.57E-03 | 3.94E-02 | 9.56E-03 | 7.32E-01 |
| <i>CG13604</i>        | FBgn0039137 | FBpp0112189   | Cobs_10310 | 1 | 4.84 | 5.27  | 4.79  | 4.88  | 8.32E-01 | 8.40E-01 | 2.46E-02 | 4.63E-02 | 9.17E-03 | 6.97E-01 |
| <i>Rpl31</i>          | FBgn0025286 | FBpp0087608   | Cobs_10311 | 1 | 9.92 | 10.98 | 10.23 | 10.42 | 2.12E-01 | 2.24E-02 | 3.74E-05 | 1.58E-02 | 1.48E-03 | 4.80E-01 |
| <i>Rpn9</i>           | FBgn0028691 | FBpp0083861   | Cobs_10320 | 1 | 6.32 | 5.72  | 6.62  | 6.71  | 2.23E-01 | 8.19E-02 | 1.16E-02 | 1.33E-04 | 2.90E-04 | 7.93E-01 |
| <i>NA</i>             | NA          | No hits found | Cobs_10345 | 0 | 4.98 | 4.29  | 4.77  | 4.67  | 3.00E-01 | 9.43E-02 | 5.72E-04 | 4.33E-02 | 8.72E-03 | 6.97E-01 |
| <i>CG1240</i>         | FBgn0035370 | FBpp0072839   | Cobs_10429 | 1 | 9.36 | 8.75  | 9.32  | 9.62  | 8.77E-01 | 1.76E-01 | 2.27E-03 | 7.66E-05 | 3.35E-03 | 1.62E-01 |
| <i>Aph-4</i>          | FBgn0016123 | FBpp0085095   | Cobs_10568 | 1 | 7.71 | 5.56  | 7.56  | 7.89  | 8.88E-01 | 8.43E-01 | 5.71E-03 | 2.92E-03 | 7.65E-03 | 7.56E-01 |
| <i>CG2889</i>         | FBgn0030206 | FBpp0298822   | Cobs_10681 | 0 | 7.97 | 8.96  | 8.14  | 8.18  | 7.27E-01 | 6.49E-01 | 1.49E-02 | 4.97E-02 | 3.78E-02 | 9.60E-01 |
| <i>sqd</i>            | FBgn0263396 | FBpp0082319   | Cobs_10726 | 0 | 7.47 | 6.58  | 7.48  | 7.56  | 9.73E-01 | 7.34E-01 | 3.78E-04 | 1.41E-04 | 3.10E-04 | 8.10E-01 |
| <i>Npc2a</i>          | FBgn0031381 | FBpp0077492   | Cobs_10839 | 1 | 3.84 | 3.27  | 3.88  | 3.85  | 9.37E-01 | 9.36E-01 | 2.73E-02 | 3.55E-02 | 1.59E-02 | 8.93E-01 |
| <i>Pabp2</i>          | FBgn0005648 | FBpp0087864   | Cobs_10901 | 1 | 4.40 | 3.75  | 4.56  | 4.50  | 5.65E-01 | 7.23E-01 | 1.49E-02 | 5.44E-03 | 2.07E-03 | 8.81E-01 |
| -                     | -           | FBpp0077334   | Cobs_10907 | 0 | 1.89 | 0.93  | 1.76  | 1.83  | 7.62E-01 | 8.90E-01 | 1.21E-02 | 2.02E-02 | 2.28E-02 | 9.12E-01 |
| <i>Taf13</i>          | FBgn0032847 | FBpp0080872   | Cobs_10930 | 1 | 5.18 | 4.87  | 5.19  | 5.26  | 9.94E-01 | 6.79E-01 | 4.32E-02 | 1.30E-02 | 3.44E-02 | 7.37E-01 |
| <i>Scgalpha</i>       | FBgn0032013 | FBpp0079217   | Cobs_10974 | 1 | 3.56 | 4.21  | 3.21  | 3.36  | 1.10E-01 | 3.33E-01 | 3.07E-03 | 2.95E-04 | 3.28E-05 | 6.13E-01 |
| <i>5Ptasel</i>        | FBgn0259178 | FBpp0288936   | Cobs_10987 | 1 | 5.94 | 6.43  | 5.93  | 6.03  | 9.73E-01 | 6.39E-01 | 1.02E-02 | 3.78E-02 | 7.09E-03 | 6.63E-01 |
| <i>Pabp2</i>          | FBgn0005648 | FBpp0087864   | Cobs_11061 | 0 | 7.00 | 6.28  | 7.34  | 6.98  | 3.27E-01 | 9.53E-01 | 2.20E-02 | 2.45E-02 | 1.06E-03 | 3.18E-01 |

|                  |             |               |            |   |       |       |       |       |          |          |          |          |          |          |
|------------------|-------------|---------------|------------|---|-------|-------|-------|-------|----------|----------|----------|----------|----------|----------|
| <i>scrt</i>      | FBgn0004880 | FBpp0073022   | Cobs_11078 | 0 | 3.21  | 4.12  | 3.06  | 3.46  | 7.42E-01 | 2.91E-01 | 9.13E-04 | 1.80E-02 | 2.45E-04 | 1.85E-01 |
| NA               | NA          | No hits found | Cobs_11124 | 0 | 2.13  | 1.02  | 3.39  | 2.40  | 6.74E-04 | 4.52E-01 | 1.38E-02 | 2.19E-03 | 2.04E-06 | 7.90E-03 |
| <i>CG6619</i>    | FBgn0035676 | FBpp0076757   | Cobs_11140 | 1 | 5.42  | 6.15  | 5.25  | 5.64  | 4.80E-01 | 3.13E-01 | 1.11E-03 | 1.72E-02 | 1.17E-04 | 9.74E-02 |
| <i>Or13a</i>     | FBgn0030715 | FBpp0073938   | Cobs_11149 | 0 | 7.83  | 5.21  | 9.58  | 8.14  | 2.07E-01 | 8.38E-01 | 4.53E-02 | 2.29E-02 | 1.35E-03 | 3.42E-01 |
| <i>mRpL52</i>    | FBgn0033208 | FBpp0088016   | Cobs_11161 | 1 | 3.96  | 3.56  | 4.25  | 4.41  | 1.03E-01 | 6.65E-03 | 2.32E-02 | 3.49E-05 | 2.15E-04 | 3.93E-01 |
| <i>RpS17</i>     | FBgn0005533 | FBpp0076207   | Cobs_11179 | 1 | 10.45 | 11.48 | 10.41 | 10.76 | 8.95E-01 | 4.94E-02 | 1.16E-06 | 1.16E-04 | 9.38E-07 | 5.80E-02 |
| <i>mus308</i>    | FBgn0002905 | FBpp0082131   | Cobs_11464 | 1 | 5.10  | 4.02  | 5.00  | 4.55  | 7.04E-01 | 8.05E-03 | 1.49E-05 | 1.54E-02 | 4.56E-05 | 4.68E-02 |
| <i>RpL21</i>     | FBgn0032987 | FBpp0085314   | Cobs_11474 | 1 | 8.63  | 9.61  | 8.63  | 9.15  | 9.89E-01 | 6.97E-03 | 1.92E-05 | 2.24E-02 | 2.31E-05 | 1.67E-02 |
| <i>Tsc1</i>      | FBgn0026317 | FBpp0083931   | Cobs_11496 | 1 | 7.27  | 7.70  | 7.32  | 7.31  | 7.13E-01 | 7.80E-01 | 7.86E-04 | 1.97E-03 | 2.24E-03 | 9.46E-01 |
| <i>Psi</i>       | FBgn0014870 | FBpp0086221   | Cobs_11673 | 1 | 8.02  | 9.09  | 8.18  | 8.18  | 4.03E-01 | 3.85E-01 | 2.27E-06 | 2.88E-05 | 2.31E-05 | 9.89E-01 |
| <i>FKBP59</i>    | FBgn0029174 | FBpp0079468   | Cobs_11676 | 1 | 6.50  | 5.54  | 6.48  | 6.74  | 9.55E-01 | 4.21E-01 | 1.54E-03 | 1.75E-04 | 1.60E-03 | 4.37E-01 |
| <i>mRpS18B</i>   | FBgn0032849 | FBpp0080871   | Cobs_11729 | 1 | 3.99  | 3.41  | 4.28  | 4.30  | 2.77E-01 | 1.94E-01 | 2.00E-02 | 7.86E-04 | 7.43E-04 | 9.28E-01 |
| <i>Prosalph6</i> | FBgn0250843 | FBpp0079538   | Cobs_11762 | 1 | 7.67  | 7.12  | 7.83  | 8.36  | 5.63E-01 | 2.83E-03 | 1.52E-02 | 1.00E-05 | 2.13E-03 | 3.57E-02 |
| <i>REG</i>       | FBgn0029133 | FBpp0073561   | Cobs_11838 | 1 | 6.39  | 5.68  | 6.43  | 6.50  | 9.00E-01 | 7.41E-01 | 1.83E-02 | 6.27E-03 | 9.33E-03 | 8.84E-01 |
| <i>CG33199</i>   | FBgn0053199 | FBpp0298345   | Cobs_11921 | 0 | 5.50  | 6.39  | 5.87  | 5.69  | 6.69E-02 | 3.36E-01 | 3.45E-05 | 6.45E-04 | 5.74E-03 | 4.23E-01 |
| <i>skpA</i>      | FBgn0025637 | FBpp0099971   | Cobs_11995 | 1 | 4.21  | 3.68  | 4.18  | 4.25  | 9.57E-01 | 8.59E-01 | 3.63E-03 | 2.26E-03 | 3.27E-03 | 8.42E-01 |
| <i>mRpL24</i>    | FBgn0031651 | FBpp0078694   | Cobs_12017 | 1 | 4.94  | 4.53  | 5.31  | 5.21  | 8.68E-02 | 1.92E-01 | 4.79E-02 | 1.79E-03 | 3.50E-04 | 7.19E-01 |
| <i>jp</i>        | FBgn0032129 | FBpp0293020   | Cobs_12143 | 0 | 0.82  | 1.69  | 0.79  | 0.65  | 9.60E-01 | 9.22E-01 | 3.33E-02 | 2.74E-02 | 3.11E-02 | 9.01E-01 |
| <i>CG5065</i>    | FBgn0034145 | FBpp0297360   | Cobs_12230 | 0 | 4.10  | 5.73  | 4.06  | 2.85  | 9.22E-01 | 8.57E-02 | 4.96E-03 | 1.63E-04 | 2.50E-03 | 1.57E-01 |
| -                | -           | FBpp0089114   | Cobs_12232 | 0 | 5.16  | 5.91  | 5.03  | 5.40  | 5.92E-01 | 2.24E-01 | 7.16E-04 | 1.87E-02 | 1.18E-04 | 9.35E-02 |
| <i>RpS3A</i>     | FBgn0017545 | FBpp0300615   | Cobs_12237 | 1 | 10.93 | 11.84 | 11.12 | 11.36 | 4.44E-01 | 4.57E-02 | 1.97E-04 | 3.39E-02 | 1.84E-03 | 3.58E-01 |
| NA               | NA          | No hits found | Cobs_12239 | 0 | 1.57  | 0.21  | 1.84  | 1.58  | 4.42E-01 | 9.33E-01 | 1.14E-02 | 9.66E-03 | 1.10E-03 | 5.69E-01 |
| <i>CG10973</i>   | FBgn0036306 | FBpp0099759   | Cobs_12244 | 1 | 7.34  | 8.09  | 7.68  | 7.66  | 4.44E-02 | 3.58E-02 | 2.90E-05 | 7.53E-03 | 9.08E-03 | 9.39E-01 |
| -                | -           | FBpp0300172   | Cobs_12255 | 1 | 3.14  | 4.00  | 3.08  | 3.26  | 7.46E-01 | 7.30E-01 | 9.46E-04 | 3.46E-03 | 2.32E-04 | 5.11E-01 |
| <i>AstA-R1</i>   | FBgn0266429 | FBpp0070550   | Cobs_12273 | 0 | 3.85  | 4.38  | 3.80  | 3.74  | 8.51E-01 | 7.20E-01 | 8.16E-03 | 3.17E-03 | 3.09E-03 | 9.08E-01 |
| <i>Klp3A</i>     | FBgn0011606 | FBpp0070432   | Cobs_12296 | 1 | 5.58  | 4.97  | 5.47  | 5.32  | 4.35E-01 | 5.10E-02 | 8.13E-05 | 1.58E-02 | 7.95E-04 | 3.72E-01 |
| <i>CG32121</i>   | FBgn0052121 | FBpp0112336   | Cobs_12300 | 1 | 4.90  | 5.67  | 5.09  | 4.96  | 4.46E-01 | 8.18E-01 | 3.44E-04 | 9.35E-04 | 2.71E-03 | 6.80E-01 |
| <i>CDase</i>     | FBgn0039774 | FBpp0085011   | Cobs_12439 | 0 | 5.00  | 6.44  | 4.97  | 5.38  | 9.48E-01 | 4.92E-01 | 6.49E-03 | 4.21E-02 | 3.87E-03 | 4.92E-01 |
| <i>CG3338</i>    | FBgn0031598 | FBpp0077151   | Cobs_12458 | 1 | 5.00  | 5.36  | 4.99  | 5.01  | 9.74E-01 | 9.85E-01 | 2.31E-02 | 2.43E-02 | 1.59E-02 | 9.67E-01 |

|                 |             |               |            |   |       |       |       |       |          |          |          |          |          |          |
|-----------------|-------------|---------------|------------|---|-------|-------|-------|-------|----------|----------|----------|----------|----------|----------|
| <i>beat-VII</i> | FBgn0250908 | FBpp0288767   | Cobs_12464 | 1 | 1.83  | 2.60  | 1.40  | 1.78  | 3.39E-01 | 1.00E+00 | 3.69E-02 | 4.18E-02 | 1.92E-03 | 3.82E-01 |
| <i>RpL7A</i>    | FBgn0014026 | FBpp0070878   | Cobs_12467 | 1 | 10.39 | 11.23 | 10.56 | 10.81 | 3.66E-01 | 1.02E-02 | 1.49E-05 | 1.30E-02 | 2.18E-04 | 1.78E-01 |
| <i>Ntf-2</i>    | FBgn0031145 | FBpp0111920   | Cobs_12475 | 1 | 7.75  | 7.33  | 8.01  | 7.82  | 2.65E-01 | 8.08E-01 | 4.70E-02 | 2.03E-02 | 1.65E-03 | 4.43E-01 |
| <i>Cen</i>      | FBgn0032876 | FBpp0080931   | Cobs_12483 | 1 | 6.32  | 6.92  | 6.17  | 6.36  | 5.39E-01 | 8.80E-01 | 4.32E-03 | 7.18E-03 | 5.45E-04 | 4.51E-01 |
| <i>sdk</i>      | FBgn0021764 | FBpp0291469   | Cobs_12500 | 1 | 7.09  | 6.62  | 7.08  | 6.92  | 9.68E-01 | 2.48E-01 | 2.05E-03 | 4.07E-02 | 2.00E-03 | 3.42E-01 |
| <i>RpS24</i>    | FBgn0261596 | FBpp0071846   | Cobs_12509 | 1 | 9.70  | 10.69 | 9.78  | 10.08 | 7.49E-01 | 7.10E-02 | 4.87E-05 | 6.30E-03 | 1.66E-04 | 2.32E-01 |
| <i>CG42741</i>  | FBgn0261705 | FBpp0292301   | Cobs_12533 | 0 | 5.59  | 6.00  | 5.53  | 5.43  | 8.47E-01 | 5.00E-01 | 3.17E-02 | 4.84E-03 | 1.32E-02 | 7.30E-01 |
| <i>CG11257</i>  | FBgn0034442 | FBpp0085713   | Cobs_12559 | 1 | 5.70  | 6.22  | 5.92  | 5.79  | 1.71E-01 | 5.75E-01 | 7.46E-04 | 4.13E-03 | 2.92E-02 | 4.97E-01 |
| -               | -           | FBpp0289064   | Cobs_12584 | 1 | 3.57  | 4.51  | 3.71  | 3.15  | 5.70E-01 | 2.44E-01 | 6.11E-04 | 6.59E-05 | 2.56E-03 | 1.02E-01 |
| -               | -           | FBpp0271754   | Cobs_12875 | 1 | 5.82  | 6.61  | 5.85  | 6.11  | 9.36E-01 | 2.20E-01 | 1.24E-03 | 3.11E-02 | 1.36E-03 | 3.33E-01 |
| <i>MESK2</i>    | FBgn0043070 | FBpp0088649   | Cobs_12923 | 1 | 4.80  | 5.75  | 4.78  | 4.88  | 9.52E-01 | 6.94E-01 | 2.05E-05 | 1.02E-04 | 1.78E-05 | 6.87E-01 |
| <i>Gr28b</i>    | FBgn0045495 | FBpp0089144   | Cobs_12929 | 0 | 3.28  | 1.80  | 2.89  | 2.76  | 4.47E-01 | 2.30E-01 | 1.48E-03 | 3.22E-02 | 9.08E-03 | 7.84E-01 |
| <i>CG42542</i>  | FBgn0260659 | FBpp0291531   | Cobs_12938 | 0 | 4.59  | 5.16  | 4.77  | 4.54  | 2.87E-01 | 8.36E-01 | 2.95E-04 | 1.96E-04 | 5.17E-03 | 2.12E-01 |
| <i>scat</i>     | FBgn0011232 | FBpp0079409   | Cobs_12992 | 1 | 6.80  | 7.68  | 7.09  | 7.13  | 1.39E-01 | 6.65E-02 | 2.50E-05 | 3.36E-03 | 1.68E-03 | 8.98E-01 |
| <i>CG8483</i>   | FBgn0038126 | FBpp0082250   | Cobs_12998 | 0 | 0.74  | 2.07  | 1.01  | 1.04  | 6.40E-01 | 7.00E-01 | 3.77E-03 | 1.30E-02 | 1.10E-02 | 9.55E-01 |
| <i>CSN6</i>     | FBgn0028837 | FBpp0083658   | Cobs_13035 | 1 | 5.32  | 4.85  | 5.38  | 5.51  | 8.41E-01 | 4.58E-01 | 4.00E-02 | 5.40E-03 | 1.65E-02 | 6.93E-01 |
| <i>SmF</i>      | FBgn0000426 | FBpp0087118   | Cobs_13071 | 1 | 5.76  | 5.07  | 5.91  | 6.29  | 6.84E-01 | 7.82E-02 | 3.54E-02 | 4.34E-04 | 8.11E-03 | 2.82E-01 |
| <i>CG32698</i>  | FBgn0052698 | FBpp0298824   | Cobs_13093 | 1 | 4.82  | 5.49  | 4.67  | 4.68  | 6.18E-01 | 6.88E-01 | 2.09E-02 | 6.53E-03 | 3.34E-03 | 9.45E-01 |
| <i>CG33970</i>  | FBgn0053970 | FBpp0099384   | Cobs_13142 | 1 | 5.70  | 6.32  | 5.75  | 5.16  | 8.96E-01 | 5.94E-02 | 2.88E-02 | 2.50E-04 | 3.62E-02 | 6.67E-02 |
| <i>CG5937</i>   | FBgn0029834 | FBpp0293889   | Cobs_13176 | 1 | 5.12  | 5.60  | 4.89  | 5.10  | 3.42E-01 | 9.86E-01 | 2.36E-02 | 2.48E-02 | 1.18E-03 | 3.65E-01 |
| <i>CG8910</i>   | FBgn0025833 | FBpp0086219   | Cobs_13205 | 1 | 4.12  | 4.74  | 3.88  | 3.96  | 4.23E-01 | 6.72E-01 | 2.09E-02 | 6.55E-03 | 1.55E-03 | 7.93E-01 |
| <i>CG9018</i>   | FBgn0035318 | FBpp0072788   | Cobs_13256 | 1 | 6.11  | 7.29  | 5.97  | 6.02  | 7.22E-01 | 8.17E-01 | 1.08E-03 | 5.62E-04 | 2.88E-04 | 9.30E-01 |
| <i>pirk</i>     | FBgn0034647 | FBpp0071599   | Cobs_13613 | 0 | 3.94  | 4.98  | 3.72  | 3.71  | 5.52E-01 | 6.48E-01 | 3.67E-03 | 1.28E-03 | 4.66E-04 | 9.31E-01 |
| <i>Crtc</i>     | FBgn0036746 | FBpp0074960   | Cobs_13619 | 1 | 6.00  | 6.57  | 5.88  | 5.97  | 5.75E-01 | 9.11E-01 | 3.89E-03 | 2.72E-03 | 5.66E-04 | 7.17E-01 |
| <i>NA</i>       | NA          | No hits found | Cobs_13651 | 0 | 1.77  | 2.44  | 1.32  | 1.62  | 3.65E-01 | 8.04E-01 | 4.85E-02 | 2.59E-02 | 3.12E-03 | 6.09E-01 |
| <i>Dyb</i>      | FBgn0033739 | FBpp0087040   | Cobs_13709 | 1 | 4.84  | 5.23  | 4.67  | 4.82  | 3.14E-01 | 9.27E-01 | 4.65E-03 | 3.61E-03 | 1.98E-04 | 4.09E-01 |
| <i>CG11695</i>  | FBgn0030316 | FBpp0073362   | Cobs_13715 | 0 | 3.23  | 4.44  | 2.50  | 3.53  | 1.42E-01 | 5.26E-01 | 5.04E-03 | 3.17E-02 | 8.67E-05 | 4.27E-02 |
| <i>KrT95D</i>   | FBgn0020647 | FBpp0083895   | Cobs_13723 | 0 | 5.57  | 6.00  | 5.41  | 5.55  | 4.41E-01 | 9.73E-01 | 1.49E-02 | 1.31E-02 | 1.19E-03 | 5.11E-01 |
| <i>CG4168</i>   | FBgn0028888 | FBpp0294010   | Cobs_13872 | 1 | 4.61  | 5.27  | 4.27  | 4.65  | 1.59E-01 | 8.99E-01 | 3.89E-03 | 6.55E-03 | 6.45E-05 | 1.36E-01 |



|                   |             |               |            |   |       |       |       |       |          |          |          |          |          |          |
|-------------------|-------------|---------------|------------|---|-------|-------|-------|-------|----------|----------|----------|----------|----------|----------|
| <i>Nox</i>        | FBgn0085428 | FBpp0111562   | Cobs_13875 | 1 | 6.02  | 7.00  | 6.26  | 6.31  | 4.78E-01 | 3.42E-01 | 1.26E-03 | 1.64E-02 | 8.79E-03 | 9.12E-01 |
| <i>Cht7</i>       | FBgn0035398 | FBpp0072985   | Cobs_13890 | 1 | 6.35  | 7.02  | 6.25  | 6.43  | 6.97E-01 | 7.81E-01 | 1.84E-03 | 4.66E-03 | 4.45E-04 | 5.10E-01 |
| <i>tup</i>        | FBgn0003896 | FBpp0080662   | Cobs_13958 | 1 | 3.74  | 4.37  | 3.27  | 3.57  | 4.63E-02 | 5.37E-01 | 3.00E-03 | 6.78E-04 | 1.41E-05 | 2.21E-01 |
| <i>CG18619</i>    | FBgn0032202 | FBpp0088678   | Cobs_14022 | 1 | 5.38  | 7.40  | 5.41  | 5.51  | 9.93E-01 | 8.53E-01 | 2.26E-05 | 6.69E-05 | 2.47E-05 | 8.74E-01 |
| <i>NA</i>         | NA          | No hits found | Cobs_14026 | 0 | 1.66  | 3.16  | 1.70  | 1.87  | 9.21E-01 | 7.50E-01 | 4.08E-04 | 1.50E-03 | 1.98E-04 | 7.02E-01 |
| <i>RpS3</i>       | FBgn0002622 | FBpp0083802   | Cobs_14034 | 1 | 10.18 | 10.91 | 10.28 | 10.42 | 6.45E-01 | 1.84E-01 | 2.20E-04 | 7.89E-03 | 9.01E-04 | 5.40E-01 |
| <i>Rab30</i>      | FBgn0031882 | FBpp0079056   | Cobs_14041 | 1 | 4.82  | 5.24  | 4.78  | 4.87  | 8.04E-01 | 9.48E-01 | 3.48E-02 | 4.21E-02 | 1.19E-02 | 7.81E-01 |
| <i>NA</i>         | NA          | No hits found | Cobs_14104 | 0 | 5.08  | 6.10  | 5.20  | 5.52  | 7.13E-01 | 8.38E-02 | 3.06E-04 | 2.83E-02 | 8.38E-04 | 2.73E-01 |
| <i>Klp67A</i>     | FBgn0004379 | FBpp0076227   | Cobs_14119 | 1 | 5.29  | 3.98  | 5.11  | 4.63  | 4.93E-01 | 6.14E-03 | 1.22E-05 | 1.36E-02 | 6.87E-05 | 7.47E-02 |
| <i>Prp8</i>       | FBgn0033688 | FBpp0087124   | Cobs_14126 | 1 | 9.48  | 8.90  | 9.41  | 9.27  | 7.04E-01 | 2.10E-01 | 8.16E-04 | 2.13E-02 | 2.45E-03 | 5.28E-01 |
| <i>CG12769</i>    | FBgn0033252 | FBpp0087903   | Cobs_14175 | 1 | 5.92  | 6.49  | 6.06  | 6.06  | 5.11E-01 | 4.71E-01 | 2.27E-03 | 1.72E-02 | 1.35E-02 | 9.89E-01 |
| <i>ncd</i>        | FBgn0002924 | FBpp0084900   | Cobs_14213 | 1 | 4.79  | 3.70  | 4.48  | 4.20  | 1.71E-01 | 8.36E-03 | 2.84E-05 | 2.93E-02 | 9.95E-04 | 3.01E-01 |
| <i>CG5745</i>     | FBgn0038855 | FBpp0083411   | Cobs_14223 | 1 | 5.45  | 5.73  | 5.39  | 5.43  | 7.36E-01 | 8.69E-01 | 4.96E-02 | 2.85E-02 | 1.38E-02 | 8.98E-01 |
| -                 | -           | FBpp0292531   | Cobs_14301 | 0 | 0.62  | 1.76  | 0.75  | 0.59  | 8.38E-01 | 9.51E-01 | 3.65E-03 | 3.54E-03 | 5.06E-03 | 8.17E-01 |
| <i>Oseg1</i>      | FBgn0265102 | FBpp0076386   | Cobs_14305 | 0 | 2.68  | 3.83  | 2.60  | 2.94  | 7.91E-01 | 5.58E-01 | 1.06E-03 | 6.64E-03 | 3.02E-04 | 4.02E-01 |
| <i>CG15440</i>    | FBgn0031607 | FBpp0077144   | Cobs_14357 | 0 | 2.47  | 1.57  | 2.77  | 2.56  | 3.22E-01 | 7.96E-01 | 2.85E-03 | 1.54E-03 | 1.59E-04 | 5.62E-01 |
| <i>Prosbeta7</i>  | FBgn0250746 | FBpp0078449   | Cobs_14446 | 1 | 6.36  | 5.90  | 6.79  | 7.42  | 7.62E-02 | 3.51E-05 | 3.94E-02 | 5.66E-07 | 2.34E-04 | 1.24E-02 |
| <i>Nxt1</i>       | FBgn0028411 | FBpp0072150   | Cobs_14471 | 1 | 3.71  | 3.05  | 3.69  | 3.72  | 9.48E-01 | 8.99E-01 | 9.45E-03 | 6.64E-03 | 5.56E-03 | 9.61E-01 |
| <i>Hrb27C</i>     | FBgn0004838 | FBpp0290618   | Cobs_14559 | 1 | 6.82  | 6.16  | 6.65  | 6.66  | 4.46E-01 | 4.19E-01 | 1.14E-03 | 1.09E-02 | 9.27E-03 | 9.98E-01 |
| <i>Uch</i>        | FBgn0010288 | FBpp0292511   | Cobs_14584 | 1 | 6.57  | 5.89  | 6.87  | 7.26  | 3.93E-01 | 2.49E-02 | 3.26E-02 | 1.19E-04 | 2.28E-03 | 2.87E-01 |
| <i>Aplip1</i>     | FBgn0040281 | FBpp0072523   | Cobs_14652 | 1 | 4.60  | 6.19  | 4.39  | 5.08  | 5.56E-01 | 9.43E-02 | 6.07E-06 | 3.87E-04 | 1.05E-06 | 3.48E-02 |
| <i>RpL13</i>      | FBgn0011272 | FBpp0099517   | Cobs_14911 | 1 | 5.16  | 5.92  | 5.23  | 5.33  | 8.33E-01 | 5.03E-01 | 1.37E-03 | 1.01E-02 | 2.26E-03 | 7.48E-01 |
| <i>ey</i>         | FBgn0005558 | FBpp0099809   | Cobs_15011 | 0 | 5.35  | 6.37  | 5.40  | 5.78  | 9.22E-01 | 1.07E-01 | 3.46E-04 | 2.41E-02 | 4.24E-04 | 1.95E-01 |
| <i>CG7546</i>     | FBgn0035793 | FBpp0293610   | Cobs_15051 | 1 | 9.51  | 10.27 | 9.50  | 9.53  | 9.52E-01 | 9.47E-01 | 3.74E-05 | 7.40E-05 | 3.82E-05 | 9.16E-01 |
| <i>Hers</i>       | FBgn0052529 | FBpp0297487   | Cobs_15080 | 1 | 7.50  | 8.06  | 7.63  | 7.53  | 5.81E-01 | 9.07E-01 | 9.58E-03 | 1.32E-02 | 4.17E-02 | 7.25E-01 |
| <i>Kap-alpha3</i> | FBgn0027338 | FBpp0290407   | Cobs_15105 | 1 | 7.32  | 6.85  | 7.39  | 7.29  | 8.17E-01 | 9.32E-01 | 3.26E-02 | 3.91E-02 | 1.25E-02 | 7.75E-01 |
| <i>IntS1</i>      | FBgn0034964 | FBpp0072077   | Cobs_15121 | 1 | 6.11  | 5.79  | 6.16  | 6.08  | 7.62E-01 | 8.56E-01 | 1.83E-02 | 3.06E-02 | 5.29E-03 | 6.47E-01 |
| <i>PDCD-5</i>     | FBgn0036580 | FBpp0075238   | Cobs_15136 | 1 | 4.25  | 3.83  | 4.44  | 4.46  | 4.22E-01 | 3.46E-01 | 4.49E-02 | 4.05E-03 | 3.62E-03 | 9.50E-01 |
| <i>CG5065</i>     | FBgn0034145 | FBpp0297360   | Cobs_15165 | 0 | 2.81  | 1.48  | 2.51  | 2.52  | 5.01E-01 | 5.24E-01 | 2.09E-03 | 1.34E-02 | 1.02E-02 | 9.85E-01 |

|                 |             |               |            |   |      |       |      |       |          |          |          |          |          |          |
|-----------------|-------------|---------------|------------|---|------|-------|------|-------|----------|----------|----------|----------|----------|----------|
| <i>CG31324</i>  | FBgn0051324 | FBpp0084358   | Cobs_15216 | 1 | 4.98 | 6.24  | 4.73 | 4.84  | 5.79E-01 | 7.97E-01 | 2.47E-03 | 1.29E-03 | 3.57E-04 | 8.33E-01 |
| <i>Golgin84</i> | FBgn0039188 | FBpp0084013   | Cobs_15225 | 1 | 5.04 | 5.64  | 5.13 | 5.05  | 7.47E-01 | 9.93E-01 | 2.44E-03 | 2.80E-03 | 5.43E-03 | 7.90E-01 |
| <i>Rpt6</i>     | FBgn0020369 | FBpp0076890   | Cobs_15226 | 0 | 6.58 | 5.98  | 7.10 | 7.21  | 8.13E-02 | 2.06E-02 | 3.32E-02 | 1.03E-04 | 2.16E-04 | 7.93E-01 |
| <i>tsr</i>      | FBgn0011726 | FBpp0072097   | Cobs_15242 | 1 | 9.58 | 9.23  | 9.70 | 9.66  | 5.54E-01 | 6.94E-01 | 4.61E-02 | 1.34E-02 | 6.63E-03 | 8.82E-01 |
| <i>crol</i>     | FBgn0020309 | FBpp0293786   | Cobs_15252 | 0 | 5.36 | 5.68  | 5.34 | 5.25  | 9.08E-01 | 4.26E-01 | 1.96E-02 | 2.25E-03 | 1.01E-02 | 5.90E-01 |
| <i>wupA</i>     | FBgn0004028 | FBpp0074299   | Cobs_15266 | 1 | 9.40 | 9.97  | 9.61 | 9.13  | 2.97E-01 | 1.56E-01 | 2.84E-03 | 7.86E-05 | 4.88E-02 | 2.16E-02 |
| <i>CG32645</i>  | FBgn0052645 | FBpp0073556   | Cobs_15367 | 1 | 5.18 | 5.63  | 5.04 | 4.62  | 6.31E-01 | 1.81E-02 | 4.00E-02 | 1.21E-04 | 7.26E-03 | 1.13E-01 |
| <i>CG12096</i>  | FBgn0030457 | FBpp0073558   | Cobs_15369 | 1 | 4.95 | 4.33  | 4.82 | 4.88  | 6.93E-01 | 8.26E-01 | 1.94E-02 | 3.77E-02 | 4.96E-02 | 9.02E-01 |
| <i>ogre</i>     | FBgn0004646 | FBpp0070996   | Cobs_15401 | 1 | 5.99 | 4.98  | 5.50 | 5.81  | 4.68E-02 | 4.34E-01 | 9.62E-05 | 1.12E-03 | 2.31E-02 | 2.64E-01 |
| <i>fru</i>      | FBgn0004652 | FBpp0083066   | Cobs_15419 | 0 | 4.25 | 5.18  | 4.07 | 4.60  | 4.53E-01 | 1.07E-01 | 1.11E-04 | 9.63E-03 | 1.62E-05 | 2.81E-02 |
| <i>hd</i>       | FBgn0086695 | FBpp0078445   | Cobs_15420 | 1 | 4.58 | 5.52  | 4.43 | 4.88  | 5.68E-01 | 2.45E-01 | 3.51E-04 | 9.16E-03 | 5.61E-05 | 9.66E-02 |
| <i>Rps26</i>    | FBgn0261597 | FBpp0080639   | Cobs_15425 | 1 | 9.89 | 10.86 | 9.75 | 10.17 | 5.15E-01 | 1.30E-01 | 1.49E-05 | 7.70E-04 | 2.99E-06 | 4.16E-02 |
| <i>Cirl</i>     | FBgn0033313 | FBpp0293618   | Cobs_15426 | 0 | 1.00 | 1.95  | 1.27 | 0.63  | 5.41E-01 | 4.05E-01 | 9.95E-03 | 1.33E-03 | 4.14E-02 | 1.60E-01 |
| <i>NA</i>       | NA          | No hits found | Cobs_15445 | 0 | 4.40 | 5.02  | 4.22 | 4.26  | 3.60E-01 | 6.24E-01 | 8.80E-04 | 2.61E-04 | 5.28E-05 | 7.62E-01 |
| <i>Pde11</i>    | FBgn0085370 | FBpp0111456   | Cobs_15450 | 1 | 6.32 | 6.79  | 6.30 | 6.21  | 9.63E-01 | 5.51E-01 | 4.06E-03 | 7.56E-04 | 2.77E-03 | 6.55E-01 |
| <i>CG31760</i>  | FBgn0051760 | FBpp0290241   | Cobs_15452 | 1 | 2.36 | 3.07  | 1.82 | 2.32  | 1.54E-01 | 9.41E-01 | 2.28E-02 | 1.99E-02 | 3.59E-04 | 2.21E-01 |
| <i>CG9723</i>   | FBgn0030768 | FBpp0074150   | Cobs_15506 | 1 | 4.11 | 3.04  | 4.09 | 4.15  | 9.87E-01 | 8.90E-01 | 2.24E-04 | 1.88E-04 | 2.07E-04 | 8.96E-01 |
| <i>Plc21C</i>   | FBgn0004611 | FBpp0077711   | Cobs_15529 | 0 | 3.60 | 4.18  | 3.37 | 3.55  | 3.12E-01 | 8.70E-01 | 1.49E-02 | 9.80E-03 | 6.11E-04 | 4.69E-01 |
| -               | -           | FBpp0078826   | Cobs_15554 | 1 | 5.63 | 6.33  | 5.34 | 4.90  | 4.00E-01 | 2.44E-02 | 2.16E-02 | 9.37E-05 | 1.44E-03 | 2.62E-01 |
| <i>Nfl</i>      | FBgn0042696 | FBpp0088208   | Cobs_15557 | 1 | 4.89 | 5.46  | 4.81 | 4.91  | 7.76E-01 | 9.08E-01 | 1.12E-02 | 1.65E-02 | 3.24E-03 | 7.14E-01 |
| <i>lh</i>       | FBgn0263397 | FBpp0288549   | Cobs_15567 | 0 | 1.14 | 2.51  | 0.53 | 1.17  | 3.32E-01 | 9.33E-01 | 1.14E-02 | 1.72E-02 | 6.01E-04 | 3.21E-01 |
| -               | -           | FBpp0292460   | Cobs_15589 | 1 | 8.13 | 8.82  | 8.37 | 8.15  | 2.99E-01 | 9.47E-01 | 1.58E-03 | 2.02E-03 | 2.85E-02 | 3.65E-01 |
| <i>Pten</i>     | FBgn0026379 | FBpp0088841   | Cobs_15599 | 0 | 5.39 | 5.83  | 4.94 | 4.85  | 5.87E-02 | 1.80E-02 | 4.51E-02 | 1.29E-04 | 1.98E-04 | 8.23E-01 |
| <i>by</i>       | FBgn0000244 | FBpp0290315   | Cobs_15602 | 1 | 6.65 | 7.05  | 6.46 | 6.33  | 3.30E-01 | 6.23E-02 | 2.11E-02 | 1.72E-04 | 9.78E-04 | 5.54E-01 |
| <i>CG11180</i>  | FBgn0034528 | FBpp0085566   | Cobs_15626 | 1 | 4.86 | 5.53  | 4.95 | 4.84  | 8.78E-01 | 8.97E-01 | 1.77E-02 | 1.15E-02 | 2.29E-02 | 7.96E-01 |
| <i>Or46a</i>    | FBgn0026388 | FBpp0089407   | Cobs_15681 | 1 | 2.37 | 0.93  | 2.59 | 2.40  | 4.90E-01 | 7.31E-01 | 3.08E-02 | 1.34E-02 | 4.19E-03 | 8.19E-01 |
| <i>asp</i>      | FBgn0000140 | FBpp0084071   | Cobs_15702 | 1 | 5.82 | 4.56  | 5.57 | 5.12  | 2.36E-01 | 6.21E-04 | 1.11E-06 | 6.51E-03 | 1.62E-05 | 3.59E-02 |
| <i>CG16959</i>  | FBgn0036481 | FBpp0075409   | Cobs_15713 | 1 | 3.80 | 4.98  | 4.13 | 3.48  | 3.92E-01 | 3.81E-01 | 5.73E-04 | 9.66E-05 | 4.82E-03 | 9.66E-02 |
| <i>wee</i>      | FBgn0011737 | FBpp0078999   | Cobs_15736 | 0 | 6.21 | 7.07  | 6.09 | 6.34  | 7.22E-01 | 6.92E-01 | 2.29E-03 | 7.86E-03 | 6.05E-04 | 4.54E-01 |

|                   |             |               |            |   |      |       |      |       |          |          |          |          |          |          |
|-------------------|-------------|---------------|------------|---|------|-------|------|-------|----------|----------|----------|----------|----------|----------|
| <i>Rpn3</i>       | FBgn0261396 | FBpp0291495   | Cobs_15742 | 1 | 7.56 | 6.87  | 7.75 | 7.75  | 6.09E-01 | 5.88E-01 | 3.15E-02 | 6.19E-03 | 5.29E-03 | 9.97E-01 |
| <i>Prosalpha7</i> | FBgn0023175 | FBpp0089041   | Cobs_15772 | 1 | 6.41 | 5.77  | 6.67 | 7.17  | 3.87E-01 | 5.39E-03 | 2.08E-02 | 2.43E-05 | 1.36E-03 | 1.05E-01 |
| <i>BtbVII</i>     | FBgn0263108 | FBpp0298306   | Cobs_15791 | 1 | 6.02 | 6.70  | 5.74 | 6.05  | 2.96E-01 | 9.14E-01 | 5.72E-03 | 8.31E-03 | 2.24E-04 | 2.59E-01 |
| <i>CG1737</i>     | FBgn0030293 | FBpp0073309   | Cobs_15801 | 0 | 5.87 | 6.30  | 5.75 | 5.68  | 5.73E-01 | 3.43E-01 | 3.60E-02 | 2.90E-03 | 5.17E-03 | 8.26E-01 |
| <i>Dab</i>        | FBgn0000414 | FBpp0075077   | Cobs_15809 | 1 | 3.92 | 4.66  | 3.68 | 4.09  | 4.02E-01 | 5.17E-01 | 7.63E-03 | 4.78E-02 | 5.04E-04 | 1.42E-01 |
| <i>NA</i>         | NA          | No hits found | Cobs_15942 | 0 | 6.46 | 7.63  | 6.20 | 6.12  | 5.44E-01 | 3.66E-01 | 2.73E-03 | 2.46E-04 | 3.54E-04 | 8.76E-01 |
| <i>CG14946</i>    | FBgn0032405 | FBpp0291239   | Cobs_15947 | 0 | 3.96 | 4.58  | 3.51 | 3.97  | 9.79E-02 | 9.19E-01 | 1.76E-02 | 1.31E-02 | 1.45E-04 | 1.50E-01 |
| <i>NA</i>         | NA          | No hits found | Cobs_15950 | 0 | 7.40 | 8.26  | 7.11 | 6.86  | 4.50E-01 | 1.00E-01 | 1.05E-02 | 1.45E-04 | 8.90E-04 | 5.46E-01 |
| <i>Lapsyn</i>     | FBgn0034602 | FBpp0071509   | Cobs_15992 | 0 | 2.64 | 3.22  | 2.54 | 2.56  | 6.94E-01 | 8.51E-01 | 5.16E-03 | 3.52E-03 | 1.06E-03 | 8.87E-01 |
| <i>CG8485</i>     | FBgn0033915 | FBpp0086698   | Cobs_15997 | 1 | 5.67 | 6.08  | 5.61 | 5.35  | 7.75E-01 | 6.53E-02 | 1.32E-02 | 1.27E-04 | 3.94E-03 | 1.96E-01 |
| <i>knrl</i>       | FBgn0001323 | FBpp0077870   | Cobs_16005 | 0 | 4.37 | 5.28  | 4.31 | 4.09  | 9.00E-01 | 5.74E-01 | 1.53E-02 | 3.52E-03 | 7.37E-03 | 7.40E-01 |
| <i>knrl</i>       | FBgn0001323 | FBpp0077870   | Cobs_16010 | 0 | 3.42 | 3.96  | 3.24 | 2.87  | 4.80E-01 | 4.36E-02 | 2.71E-02 | 2.21E-04 | 2.55E-03 | 2.87E-01 |
| <i>CG5721</i>     | FBgn0034315 | FBpp0085950   | Cobs_16079 | 1 | 5.15 | 4.79  | 5.50 | 5.19  | 5.70E-02 | 8.18E-01 | 3.87E-02 | 1.84E-02 | 1.71E-04 | 1.21E-01 |
| <i>EftuM</i>      | FBgn0024556 | FBpp0290603   | Cobs_16114 | 1 | 5.95 | 5.40  | 6.16 | 6.36  | 4.92E-01 | 1.31E-01 | 4.94E-02 | 1.10E-03 | 5.40E-03 | 5.76E-01 |
| <i>Obp56a</i>     | FBgn0034468 | FBpp0085672   | Cobs_16119 | 0 | 5.58 | 5.07  | 5.81 | 5.58  | 2.64E-01 | 9.73E-01 | 1.20E-02 | 1.32E-02 | 3.90E-04 | 2.74E-01 |
| <i>Ran</i>        | FBgn0020255 | FBpp0073328   | Cobs_16120 | 1 | 7.43 | 6.75  | 7.31 | 7.71  | 7.37E-01 | 3.00E-01 | 1.32E-02 | 7.70E-04 | 3.18E-02 | 1.89E-01 |
| <i>RnrS</i>       | FBgn0011704 | FBpp0087152   | Cobs_16131 | 1 | 6.32 | 5.26  | 6.27 | 6.45  | 9.10E-01 | 7.71E-01 | 4.05E-03 | 1.62E-03 | 4.82E-03 | 7.12E-01 |
| <i>RpS7</i>       | FBgn0039757 | FBpp0088440   | Cobs_16140 | 0 | 7.81 | 8.85  | 7.87 | 8.46  | 8.01E-01 | 9.60E-04 | 7.12E-06 | 4.63E-02 | 1.78E-05 | 7.08E-03 |
| <i>CG2269</i>     | FBgn0033484 | FBpp0087496   | Cobs_16244 | 1 | 5.38 | 6.02  | 5.44 | 5.43  | 8.01E-01 | 8.29E-01 | 6.77E-04 | 1.58E-03 | 1.27E-03 | 9.81E-01 |
| <i>rudhira</i>    | FBgn0266019 | FBpp0294056   | Cobs_16315 | 0 | 2.36 | 3.17  | 1.88 | 2.33  | 2.57E-01 | 9.08E-01 | 2.31E-02 | 1.72E-02 | 7.61E-04 | 3.70E-01 |
| <i>CG6966</i>     | FBgn0038286 | FBpp0112148   | Cobs_16345 | 1 | 6.62 | 6.97  | 6.30 | 6.51  | 4.50E-02 | 4.92E-01 | 1.97E-02 | 2.72E-03 | 6.05E-05 | 2.20E-01 |
| <i>RpS5a</i>      | FBgn0002590 | FBpp0074180   | Cobs_16357 | 1 | 9.79 | 10.62 | 9.76 | 10.02 | 8.84E-01 | 1.29E-01 | 6.87E-06 | 3.04E-04 | 4.43E-06 | 1.27E-01 |
| <i>dnk</i>        | FBgn0022338 | FBpp0083121   | Cobs_16383 | 0 | 3.38 | 2.54  | 3.16 | 3.30  | 5.15E-01 | 8.74E-01 | 7.29E-03 | 1.32E-02 | 3.43E-02 | 7.06E-01 |
| <i>CG2051</i>     | FBgn0037376 | FBpp0078319   | Cobs_16409 | 1 | 4.90 | 4.12  | 4.75 | 4.73  | 6.02E-01 | 5.18E-01 | 3.79E-03 | 2.37E-02 | 1.43E-02 | 9.48E-01 |
| <i>HIP-R</i>      | FBgn0029676 | FBpp0070572   | Cobs_16527 | 0 | 4.84 | 4.34  | 4.76 | 4.73  | 7.34E-01 | 6.34E-01 | 9.12E-03 | 3.59E-02 | 2.06E-02 | 9.36E-01 |
| <i>wtrw</i>       | FBgn0260005 | FBpp0081252   | Cobs_16546 | 1 | 6.64 | 6.96  | 6.63 | 6.51  | 9.35E-01 | 3.97E-01 | 3.82E-02 | 3.68E-03 | 2.40E-02 | 5.34E-01 |
| <i>fd68A</i>      | FBgn0036134 | FBpp0290010   | Cobs_16594 | 1 | 7.84 | 8.88  | 7.82 | 7.68  | 9.66E-01 | 7.16E-01 | 8.36E-03 | 2.59E-03 | 5.81E-03 | 8.01E-01 |
| <i>barr</i>       | FBgn0014127 | FBpp0080881   | Cobs_16605 | 1 | 4.94 | 4.15  | 4.92 | 4.81  | 9.57E-01 | 5.93E-01 | 6.01E-04 | 3.28E-03 | 6.08E-04 | 7.03E-01 |
| <i>CG10237</i>    | FBgn0032783 | FBpp0080749   | Cobs_16607 | 1 | 5.23 | 6.06  | 4.92 | 4.78  | 4.70E-01 | 2.25E-01 | 2.57E-02 | 1.21E-03 | 2.42E-03 | 7.66E-01 |

|                      |             |             |            |   |       |       |       |       |          |          |          |          |          |          |
|----------------------|-------------|-------------|------------|---|-------|-------|-------|-------|----------|----------|----------|----------|----------|----------|
| <i>CG3709</i>        | FBgn0031227 | FBpp0077806 | Cobs_16608 | 1 | 5.05  | 4.47  | 5.10  | 5.04  | 8.35E-01 | 9.26E-01 | 1.05E-02 | 1.43E-02 | 3.94E-03 | 7.86E-01 |
| <i>PIG-C</i>         | FBgn0035435 | FBpp0289977 | Cobs_16615 | 1 | 4.02  | 4.87  | 4.41  | 4.37  | 1.54E-01 | 1.89E-01 | 1.06E-03 | 3.45E-02 | 4.11E-02 | 9.14E-01 |
| <i>HP1b</i>          | FBgn0030082 | FBpp0291019 | Cobs_16619 | 1 | 8.07  | 7.02  | 7.98  | 7.85  | 7.80E-01 | 4.36E-01 | 1.68E-04 | 1.68E-03 | 4.24E-04 | 7.38E-01 |
| <i>qua</i>           | FBgn0003187 | FBpp0297295 | Cobs_16673 | 1 | 4.39  | 3.87  | 4.37  | 4.22  | 9.05E-01 | 2.44E-01 | 1.35E-03 | 3.07E-02 | 1.60E-03 | 3.79E-01 |
| <i>Prosbeta2</i>     | FBgn0023174 | FBpp0075382 | Cobs_16676 | 1 | 7.01  | 6.43  | 7.21  | 7.56  | 5.14E-01 | 3.23E-02 | 3.04E-02 | 1.29E-04 | 3.51E-03 | 2.43E-01 |
| <i>Rbp</i>           | FBgn0262483 | FBpp0293364 | Cobs_16697 | 1 | 5.12  | 5.72  | 4.91  | 5.16  | 4.08E-01 | 8.51E-01 | 9.79E-03 | 1.78E-02 | 6.63E-04 | 3.22E-01 |
| <i>CG30053</i>       | FBgn0050053 | FBpp0086986 | Cobs_16700 | 1 | 4.48  | 5.45  | 3.95  | 4.74  | 3.10E-02 | 2.40E-01 | 4.58E-05 | 1.51E-03 | 4.98E-07 | 2.81E-03 |
| <i>CG10311</i>       | FBgn0038420 | FBpp0082774 | Cobs_16716 | 1 | 3.39  | 4.40  | 3.39  | 3.41  | 9.15E-01 | 9.54E-01 | 1.30E-02 | 1.16E-02 | 6.08E-03 | 9.68E-01 |
| <i>uzip</i>          | FBgn0004055 | FBpp0072304 | Cobs_16737 | 1 | 5.51  | 5.94  | 5.36  | 5.09  | 5.02E-01 | 3.39E-02 | 2.28E-02 | 1.18E-04 | 2.39E-03 | 2.47E-01 |
| <i>CG2794</i>        | FBgn0031265 | FBpp0077727 | Cobs_16739 | 1 | 5.12  | 3.92  | 5.30  | 5.24  | 5.10E-01 | 7.12E-01 | 1.41E-04 | 7.62E-05 | 2.50E-05 | 8.38E-01 |
| <i>polo</i>          | FBgn0003124 | FBpp0099722 | Cobs_16820 | 1 | 6.43  | 5.16  | 6.23  | 5.72  | 4.52E-01 | 2.90E-03 | 8.90E-06 | 2.07E-02 | 6.73E-05 | 4.98E-02 |
| <i>CG5245</i>        | FBgn0038047 | FBpp0082061 | Cobs_16831 | 0 | 6.11  | 6.54  | 6.24  | 6.19  | 3.86E-01 | 6.23E-01 | 2.27E-03 | 1.01E-02 | 2.37E-02 | 7.80E-01 |
| <i>CG9437</i>        | FBgn0034599 | FBpp0071502 | Cobs_16920 | 0 | -0.27 | 1.63  | 0.41  | 0.35  | 4.26E-01 | 4.19E-01 | 2.43E-03 | 2.63E-02 | 1.93E-02 | 9.95E-01 |
| <i>CG4038</i>        | FBgn0011824 | FBpp0071562 | Cobs_16983 | 1 | 6.29  | 5.30  | 6.20  | 6.36  | 8.74E-01 | 9.10E-01 | 2.34E-02 | 1.51E-02 | 3.24E-02 | 8.05E-01 |
| <i>RpL24</i>         | FBgn0032518 | FBpp0080102 | Cobs_16986 | 1 | 9.91  | 10.79 | 10.07 | 10.33 | 4.80E-01 | 3.36E-02 | 8.09E-05 | 2.21E-02 | 7.42E-04 | 2.75E-01 |
| <i>Pof</i>           | FBgn0035047 | FBpp0297610 | Cobs_16988 | 1 | 6.07  | 6.61  | 6.04  | 6.03  | 9.12E-01 | 9.05E-01 | 2.62E-02 | 1.66E-02 | 1.43E-02 | 9.95E-01 |
| <i>PCNA</i>          | FBgn0005655 | FBpp0085619 | Cobs_16990 | 1 | 6.48  | 5.26  | 6.11  | 6.18  | 3.00E-01 | 3.61E-01 | 5.14E-04 | 6.38E-03 | 8.44E-03 | 9.07E-01 |
| <i>CG6765</i>        | FBgn0035903 | FBpp0076347 | Cobs_16992 | 1 | 5.12  | 5.96  | 4.85  | 5.30  | 2.17E-01 | 3.29E-01 | 7.42E-05 | 1.50E-03 | 3.56E-06 | 3.45E-02 |
| <i>Zfrp8</i>         | FBgn0021875 | FBpp0072162 | Cobs_17006 | 1 | 9.89  | 10.74 | 9.99  | 10.32 | 6.31E-01 | 1.74E-02 | 4.87E-05 | 2.56E-02 | 2.45E-04 | 1.18E-01 |
| <i>CG2064</i>        | FBgn0033205 | FBpp0087997 | Cobs_17047 | 0 | 2.85  | 5.35  | 3.61  | 2.17  | 2.62E-01 | 3.81E-01 | 5.08E-05 | 3.24E-05 | 6.44E-04 | 6.35E-02 |
| <i>CG14515</i>       | FBgn0039648 | FBpp0084758 | Cobs_17048 | 1 | 3.93  | 5.09  | 3.24  | 0.39  | 1.25E-01 | 3.78E-05 | 7.86E-03 | 1.57E-06 | 1.02E-04 | 2.26E-03 |
| <i>Tret1-2</i>       | FBgn0033644 | FBpp0087180 | Cobs_17061 | 0 | 5.24  | 6.33  | 5.12  | 4.44  | 8.39E-01 | 8.93E-02 | 1.01E-02 | 1.67E-04 | 3.82E-03 | 2.10E-01 |
| <i>CG6923</i>        | FBgn0037944 | FBpp0300326 | Cobs_17084 | 1 | 7.38  | 7.92  | 7.46  | 7.38  | 7.34E-01 | 9.98E-01 | 6.15E-03 | 5.90E-03 | 1.57E-02 | 7.68E-01 |
| <i>CG1299</i>        | FBgn0035501 | FBpp0073071 | Cobs_17086 | 1 | 5.14  | 5.96  | 5.21  | 5.18  | 8.88E-01 | 9.57E-01 | 1.39E-02 | 1.64E-02 | 1.75E-02 | 9.41E-01 |
| <i>Obp83a</i>        | FBgn0011281 | FBpp0078305 | Cobs_17118 | 0 | 3.68  | 3.03  | 4.41  | 3.85  | 7.90E-03 | 5.20E-01 | 3.44E-02 | 6.37E-03 | 2.58E-05 | 5.26E-02 |
| <i>RNaseX25</i>      | FBgn0010406 | FBpp0076469 | Cobs_17205 | 0 | 3.30  | 2.75  | 3.79  | 3.29  | 4.95E-02 | 8.73E-01 | 2.80E-02 | 4.69E-02 | 1.20E-04 | 4.10E-02 |
| <i>CG9328</i>        | FBgn0032886 | FBpp0080944 | Cobs_17230 | 1 | 4.02  | 4.76  | 4.06  | 4.02  | 8.64E-01 | 9.93E-01 | 2.48E-03 | 3.08E-03 | 3.34E-03 | 8.93E-01 |
| <i>His3:CG33812</i>  | FBgn0053812 | FBpp0091058 | Cobs_17232 | 0 | 7.38  | 5.94  | 6.90  | 7.06  | 1.27E-01 | 2.83E-01 | 2.35E-05 | 4.95E-04 | 1.66E-03 | 6.89E-01 |
| <i>His2B:CG33870</i> | FBgn0053870 | FBpp0091115 | Cobs_17248 | 0 | 6.06  | 4.36  | 5.65  | 5.94  | 1.88E-01 | 7.13E-01 | 6.07E-06 | 2.43E-05 | 1.41E-04 | 4.14E-01 |

|                      |             |             |            |   |       |       |       |       |          |          |          |          |          |          |
|----------------------|-------------|-------------|------------|---|-------|-------|-------|-------|----------|----------|----------|----------|----------|----------|
| <i>CG3902</i>        | FBgn0036824 | FBpp0074843 | Cobs_17251 | 0 | 9.51  | 8.51  | 9.28  | 9.56  | 5.36E-01 | 8.94E-01 | 1.83E-03 | 1.15E-03 | 1.05E-02 | 4.59E-01 |
| <i>His2A:CG33817</i> | FBgn0053817 | FBpp0091063 | Cobs_17256 | 0 | 7.40  | 5.71  | 6.80  | 7.17  | 4.68E-02 | 4.35E-01 | 1.78E-06 | 1.76E-05 | 2.70E-04 | 2.55E-01 |
| <i>CG10214</i>       | FBgn0039115 | FBpp0083854 | Cobs_17294 | 1 | 3.71  | 3.00  | 3.80  | 3.88  | 7.17E-01 | 5.37E-01 | 3.89E-03 | 7.85E-04 | 9.48E-04 | 8.73E-01 |
| <i>Klp61F</i>        | FBgn0004378 | FBpp0072616 | Cobs_17297 | 1 | 5.64  | 4.21  | 5.37  | 4.79  | 2.99E-01 | 1.11E-03 | 4.26E-06 | 1.97E-02 | 4.89E-05 | 4.08E-02 |
| <i>tok</i>           | FBgn0004885 | FBpp0084069 | Cobs_17314 | 0 | 5.64  | 5.17  | 5.67  | 5.56  | 9.35E-01 | 7.16E-01 | 1.23E-02 | 3.50E-02 | 7.14E-03 | 6.91E-01 |
| <i>CG31140</i>       | FBgn0051140 | FBpp0290185 | Cobs_17443 | 1 | 6.48  | 7.20  | 6.56  | 6.83  | 7.24E-01 | 3.13E-02 | 8.53E-05 | 2.54E-02 | 2.85E-04 | 1.35E-01 |
| <i>Prosalph1</i>     | FBgn0263121 | FBpp0087969 | Cobs_17444 | 0 | 6.64  | 6.13  | 6.85  | 7.24  | 4.05E-01 | 9.09E-03 | 3.36E-02 | 5.18E-05 | 2.47E-03 | 1.39E-01 |
| <i>Vrp1</i>          | FBgn0243516 | FBpp0291503 | Cobs_17491 | 0 | 6.55  | 6.92  | 6.55  | 6.47  | 9.95E-01 | 7.27E-01 | 3.90E-02 | 1.31E-02 | 3.19E-02 | 7.78E-01 |
| <i>SmD3</i>          | FBgn0023167 | FBpp0087094 | Cobs_17520 | 1 | 5.77  | 4.73  | 5.52  | 5.67  | 5.27E-01 | 8.18E-01 | 3.74E-03 | 8.03E-03 | 1.91E-02 | 7.62E-01 |
| <i>mei-38</i>        | FBgn0260986 | FBpp0070248 | Cobs_17551 | 0 | 7.42  | 5.96  | 7.18  | 6.78  | 2.71E-01 | 1.56E-03 | 1.34E-07 | 1.86E-04 | 1.42E-06 | 6.81E-02 |
| <i>Myo28B1</i>       | FBgn0040299 | FBpp0079098 | Cobs_17587 | 0 | 6.86  | 7.53  | 7.03  | 6.82  | 3.21E-01 | 8.69E-01 | 1.20E-04 | 9.39E-05 | 2.17E-03 | 2.51E-01 |
| <i>Sk2</i>           | FBgn0052484 | FBpp0072854 | Cobs_17596 | 1 | 5.41  | 6.77  | 5.73  | 4.98  | 2.56E-01 | 1.09E-01 | 6.87E-06 | 5.59E-07 | 1.27E-04 | 1.27E-02 |
| <i>Klp68D</i>        | FBgn0004381 | FBpp0075762 | Cobs_17598 | 1 | 5.60  | 5.99  | 5.50  | 5.50  | 5.89E-01 | 5.83E-01 | 1.53E-02 | 3.14E-03 | 2.26E-03 | 9.94E-01 |
| <i>CG42575</i>       | FBgn0260795 | FBpp0290653 | Cobs_17627 | 0 | 10.51 | 11.24 | 10.62 | 10.82 | 5.37E-01 | 3.80E-02 | 3.24E-05 | 7.91E-03 | 2.32E-04 | 2.55E-01 |
| <i>CG7928</i>        | FBgn0039740 | FBpp0084965 | Cobs_17631 | 0 | 4.29  | 2.96  | 4.12  | 3.69  | 5.36E-01 | 2.14E-02 | 3.09E-05 | 1.24E-02 | 1.70E-04 | 1.58E-01 |
| <i>chb</i>           | FBgn0021760 | FBpp0088471 | Cobs_17641 | 0 | 3.41  | 4.08  | 3.55  | 3.60  | 7.50E-01 | 6.75E-01 | 1.32E-02 | 4.53E-02 | 2.60E-02 | 9.49E-01 |
| <i>Tcp-1zeta</i>     | FBgn0027329 | FBpp0073902 | Cobs_17735 | 1 | 7.75  | 7.06  | 7.54  | 7.75  | 4.31E-01 | 9.92E-01 | 4.92E-03 | 4.48E-03 | 4.06E-02 | 4.56E-01 |
| <i>Pp2A-29B</i>      | FBgn0260439 | FBpp0293227 | Cobs_17811 | 1 | 6.64  | 6.20  | 6.84  | 6.74  | 3.86E-01 | 6.64E-01 | 3.52E-02 | 9.43E-03 | 2.34E-03 | 7.41E-01 |
| <i>Adgf-A</i>        | FBgn0036752 | FBpp0089360 | Cobs_17822 | 1 | 8.44  | 10.84 | 8.37  | 8.75  | 9.45E-01 | 6.42E-01 | 3.62E-04 | 1.58E-03 | 2.66E-04 | 6.34E-01 |
| <i>Fie</i>           | FBgn0026592 | FBpp0073015 | Cobs_17938 | 1 | 1.91  | 3.40  | 1.92  | 2.45  | 9.92E-01 | 2.67E-01 | 2.15E-03 | 4.10E-02 | 1.42E-03 | 3.18E-01 |
| <i>CG12502</i>       | FBgn0035171 | FBpp0293242 | Cobs_17946 | 1 | 1.30  | 3.18  | 1.70  | 1.84  | 6.62E-01 | 5.15E-01 | 4.97E-03 | 2.95E-02 | 1.14E-02 | 8.94E-01 |
| <i>Nup58</i>         | FBgn0038722 | FBpp0083195 | Cobs_17966 | 1 | 6.49  | 6.77  | 6.34  | 6.39  | 3.50E-01 | 5.41E-01 | 3.53E-02 | 6.00E-03 | 1.88E-03 | 8.07E-01 |
| <i>CG4159</i>        | FBgn0038811 | FBpp0083351 | Cobs_17971 | 1 | 4.37  | 3.98  | 4.64  | 4.41  | 1.35E-01 | 8.53E-01 | 3.72E-02 | 2.09E-02 | 4.92E-04 | 2.41E-01 |
| <i>defl</i>          | FBgn0036038 | FBpp0076132 | Cobs_18014 | 1 | 4.92  | 4.40  | 4.73  | 4.76  | 2.42E-01 | 2.84E-01 | 1.58E-03 | 2.81E-02 | 3.37E-02 | 9.23E-01 |
| <i>l(2)k14710</i>    | FBgn0021847 | FBpp0297109 | Cobs_18041 | 1 | 6.98  | 7.61  | 7.14  | 7.02  | 3.93E-01 | 8.32E-01 | 4.22E-04 | 9.36E-04 | 4.72E-03 | 5.96E-01 |
| <i>CG8891</i>        | FBgn0031663 | FBpp0078684 | Cobs_18044 | 1 | 4.69  | 3.94  | 4.43  | 4.72  | 2.65E-01 | 9.26E-01 | 1.64E-03 | 1.41E-03 | 2.91E-02 | 2.45E-01 |
| <i>Lip4</i>          | FBgn0032264 | FBpp0293062 | Cobs_18114 | 0 | 2.15  | 0.66  | 3.09  | 2.19  | 1.49E-02 | 8.33E-01 | 4.39E-03 | 2.75E-03 | 1.41E-05 | 3.97E-02 |
| <i>CG4797</i>        | FBgn0034909 | FBpp0072148 | Cobs_18130 | 1 | 7.69  | 8.49  | 7.66  | 7.73  | 9.57E-01 | 8.83E-01 | 2.21E-03 | 3.59E-03 | 1.56E-03 | 8.61E-01 |
| <i>CG11050</i>       | FBgn0031836 | FBpp0078923 | Cobs_18134 | 1 | 3.13  | 2.37  | 2.98  | 3.11  | 6.30E-01 | 9.53E-01 | 4.20E-03 | 5.85E-03 | 1.34E-02 | 7.32E-01 |

|                  |             |             |            |   |       |       |       |       |          |          |          |          |          |          |
|------------------|-------------|-------------|------------|---|-------|-------|-------|-------|----------|----------|----------|----------|----------|----------|
| <i>Octbeta2R</i> | FBgn0038063 | FBpp0293386 | Cobs_18165 | 1 | 2.56  | 3.73  | 2.50  | 1.93  | 8.81E-01 | 2.81E-01 | 8.03E-03 | 8.23E-04 | 3.24E-03 | 4.40E-01 |
| <i>RpS6</i>      | FBgn0261592 | FBpp0071087 | Cobs_18190 | 1 | 10.17 | 10.98 | 10.18 | 10.49 | 9.63E-01 | 1.06E-01 | 2.53E-04 | 1.72E-02 | 2.89E-04 | 1.75E-01 |
| <i>Nlp</i>       | FBgn0016685 | FBpp0084918 | Cobs_18205 | 1 | 8.65  | 7.62  | 8.32  | 8.60  | 3.34E-01 | 9.11E-01 | 1.24E-03 | 1.84E-03 | 1.83E-02 | 4.39E-01 |
| <i>tnc</i>       | FBgn0039257 | FBpp0296948 | Cobs_18216 | 1 | 8.81  | 7.36  | 8.47  | 8.08  | 3.11E-01 | 1.28E-02 | 2.11E-05 | 1.40E-02 | 4.04E-04 | 2.51E-01 |
| <i>CG11319</i>   | FBgn0031835 | FBpp0088584 | Cobs_18251 | 1 | 3.45  | 3.94  | 3.30  | 3.37  | 4.49E-01 | 7.74E-01 | 2.50E-02 | 1.13E-02 | 2.00E-03 | 7.38E-01 |
| <i>amon</i>      | FBgn0023179 | FBpp0084420 | Cobs_18270 | 1 | 4.61  | 5.19  | 4.19  | 4.46  | 7.12E-02 | 5.80E-01 | 6.46E-03 | 1.49E-03 | 3.72E-05 | 2.65E-01 |
| <i>CG1213</i>    | FBgn0037387 | FBpp0297096 | Cobs_18279 | 0 | 2.95  | 1.25  | 3.50  | 2.76  | 2.24E-01 | 7.89E-01 | 8.04E-03 | 1.80E-02 | 3.54E-04 | 1.51E-01 |
| <i>Rpd3</i>      | FBgn0015805 | FBpp0073173 | Cobs_18285 | 1 | 5.11  | 4.67  | 5.23  | 5.48  | 6.83E-01 | 1.09E-01 | 4.84E-02 | 8.80E-04 | 1.12E-02 | 3.47E-01 |
| <i>Mcm7</i>      | FBgn0020633 | FBpp0076312 | Cobs_18287 | 1 | 5.99  | 4.77  | 5.75  | 5.59  | 5.14E-01 | 2.26E-01 | 5.95E-04 | 1.46E-02 | 3.34E-03 | 7.29E-01 |
| <i>CG9953</i>    | FBgn0035726 | FBpp0076608 | Cobs_18301 | 1 | 5.36  | 4.65  | 5.57  | 5.24  | 3.91E-01 | 6.52E-01 | 3.37E-03 | 1.32E-02 | 2.32E-04 | 1.94E-01 |
| <i>dnc</i>       | FBgn0000479 | FBpp0070498 | Cobs_18308 | 0 | 10.14 | 11.76 | 10.20 | 10.17 | 8.78E-01 | 9.38E-01 | 2.26E-05 | 4.51E-05 | 4.50E-05 | 9.47E-01 |

Supplementary Table S2: List of genes that are either significantly up- or downregulated in WO compared to all three other phenotypes.

The binary flag Orthology is set to 1, if orthology was confirmed in reciprocal blasts. The columns EM, QU, WM, and WO give the mean expression as assessed by limma. The last six columns give FDR values for pairwise comparisons, also produced with limma.

| FB gene symbol    | FB gene ID  | FB protein ID | C.obs ID   | Orthol. | EM   | QU   | WM    | WO    | EM vs WM | EM vs WO | EM vs QU | QU vs WO | QU vs WM | WO vs WM |
|-------------------|-------------|---------------|------------|---------|------|------|-------|-------|----------|----------|----------|----------|----------|----------|
| <i>Cip4</i>       | FBgn0035533 | FBpp0297491   | Cobs_00072 | 1       | 6.53 | 6.60 | 6.52  | 6.04  | 9.79E-01 | 9.26E-04 | 6.59E-01 | 2.95E-04 | 6.03E-01 | 3.30E-03 |
| <i>cln3</i>       | FBgn0036756 | FBpp0074933   | Cobs_00096 | 1       | 5.35 | 5.57 | 5.46  | 6.25  | 7.37E-01 | 1.08E-03 | 4.42E-01 | 1.12E-02 | 6.97E-01 | 9.05E-03 |
| <i>CG8860</i>     | FBgn0033691 | FBpp0087119   | Cobs_00179 | 0       | 6.27 | 6.00 | 6.32  | 7.04  | 9.10E-01 | 1.71E-02 | 4.42E-01 | 2.32E-03 | 3.19E-01 | 4.81E-02 |
| <i>CG8331</i>     | FBgn0033906 | FBpp0291641   | Cobs_00201 | 1       | 6.79 | 6.86 | 7.19  | 8.14  | 1.12E-01 | 3.48E-06 | 7.96E-01 | 1.00E-05 | 1.50E-01 | 7.42E-04 |
| <i>Jhl-26</i>     | FBgn0028424 | FBpp0086283   | Cobs_00347 | 0       | 3.26 | 3.33 | 3.28  | 4.49  | 9.73E-01 | 8.78E-03 | 8.97E-01 | 1.64E-02 | 9.17E-01 | 2.03E-02 |
| <i>CG11929</i>    | FBgn0031620 | FBpp0077069   | Cobs_00361 | 0       | 0.96 | 1.74 | 1.66  | 2.73  | 2.50E-01 | 1.17E-03 | 1.68E-01 | 4.69E-02 | 8.60E-01 | 4.14E-02 |
| <i>Nmd3</i>       | FBgn0023542 | FBpp0070409   | Cobs_00363 | 1       | 7.90 | 8.30 | 8.17  | 9.52  | 7.15E-01 | 6.29E-03 | 5.46E-01 | 3.77E-02 | 8.47E-01 | 4.14E-02 |
| <i>Tim9a</i>      | FBgn0030480 | FBpp0073606   | Cobs_00397 | 1       | 3.61 | 4.01 | 4.15  | 5.07  | 1.13E-01 | 3.34E-05 | 2.59E-01 | 7.65E-04 | 6.33E-01 | 5.41E-03 |
| <i>osp</i>        | FBgn0003016 | FBpp0290711   | Cobs_00410 | 1       | 6.80 | 6.65 | 6.82  | 6.30  | 9.31E-01 | 1.28E-03 | 3.51E-01 | 1.86E-02 | 2.63E-01 | 3.17E-03 |
| <i>serp</i>       | FBgn0260653 | FBpp0074721   | Cobs_00581 | 1       | 7.82 | 7.33 | 7.44  | 6.57  | 2.26E-01 | 6.23E-05 | 8.49E-02 | 6.56E-03 | 7.00E-01 | 6.07E-03 |
| <i>lh</i>         | FBgn0263397 | FBpp0288731   | Cobs_00625 | 0       | 4.85 | 5.19 | 4.98  | 3.81  | 8.71E-01 | 5.18E-03 | 4.44E-01 | 7.91E-04 | 5.50E-01 | 8.25E-03 |
| <i>Mes-4</i>      | FBgn0039559 | FBpp0084636   | Cobs_00629 | 0       | 2.93 | 3.32 | 2.92  | 1.81  | 8.97E-01 | 3.93E-03 | 3.37E-01 | 4.67E-04 | 2.17E-01 | 1.38E-02 |
| <i>CG6523</i>     | FBgn0032509 | FBpp0080044   | Cobs_00872 | 1       | 7.04 | 6.94 | 7.40  | 8.08  | 2.32E-01 | 3.53E-04 | 7.67E-01 | 1.67E-04 | 8.47E-02 | 2.71E-02 |
| <i>mRpl21</i>     | FBgn0036853 | FBpp0074789   | Cobs_00875 | 1       | 4.05 | 4.05 | 4.32  | 4.92  | 4.01E-01 | 1.86E-03 | 9.59E-01 | 2.10E-03 | 3.13E-01 | 3.92E-02 |
| <i>NP15.6</i>     | FBgn0027785 | FBpp0083126   | Cobs_01012 | 1       | 5.50 | 5.22 | 5.78  | 6.33  | 2.42E-01 | 3.42E-04 | 2.36E-01 | 2.88E-05 | 1.08E-02 | 2.32E-02 |
| <i>primo-1</i>    | FBgn0040077 | FBpp0099895   | Cobs_01015 | 0       | 2.32 | 2.20 | 2.50  | 3.27  | 6.39E-01 | 1.68E-03 | 7.42E-01 | 9.42E-04 | 3.40E-01 | 1.48E-02 |
| <i>CG15661</i>    | FBgn0034605 | FBpp0110111   | Cobs_01020 | 0       | 9.77 | 9.57 | 10.13 | 11.31 | 4.21E-01 | 3.38E-04 | 6.59E-01 | 1.18E-04 | 1.46E-01 | 1.10E-02 |
| <i>CG6750</i>     | FBgn0032292 | FBpp0079711   | Cobs_01103 | 1       | 4.36 | 4.34 | 4.48  | 5.00  | 6.75E-01 | 5.39E-03 | 9.39E-01 | 5.16E-03 | 5.58E-01 | 3.77E-02 |
| <i>NA</i>         | NA          | No hits found | Cobs_01255 | 0       | 4.41 | 4.35 | 4.39  | 5.07  | 9.69E-01 | 3.13E-02 | 9.01E-01 | 2.39E-02 | 9.29E-01 | 4.81E-02 |
| <i>Tgi</i>        | FBgn0036373 | FBpp0075552   | Cobs_01265 | 0       | 5.58 | 5.90 | 5.69  | 5.12  | 6.39E-01 | 1.49E-02 | 9.69E-02 | 2.31E-04 | 2.52E-01 | 9.60E-03 |
| <i>ATPsyn-Cf6</i> | FBgn0016119 | FBpp0297124   | Cobs_01405 | 1       | 5.72 | 5.81 | 6.17  | 6.89  | 7.85E-02 | 1.99E-05 | 7.70E-01 | 6.69E-05 | 1.14E-01 | 6.94E-03 |
| <i>CG11333</i>    | FBgn0039850 | FBpp0085150   | Cobs_01531 | 1       | 4.15 | 4.52 | 4.89  | 5.84  | 9.73E-02 | 1.28E-04 | 4.55E-01 | 1.38E-03 | 3.38E-01 | 2.59E-02 |
| <i>CG17896</i>    | FBgn0023537 | FBpp0070087   | Cobs_01532 | 1       | 5.29 | 4.95 | 5.26  | 6.09  | 9.84E-01 | 2.13E-02 | 3.87E-01 | 2.42E-03 | 3.69E-01 | 3.86E-02 |
| <i>Srp19</i>      | FBgn0015298 | FBpp0076589   | Cobs_01611 | 1       | 5.85 | 5.92 | 6.03  | 6.47  | 3.91E-01 | 1.17E-03 | 7.53E-01 | 3.80E-03 | 5.83E-01 | 3.10E-02 |

|                   |             |               |            |   |      |       |       |       |          |          |          |          |          |          |
|-------------------|-------------|---------------|------------|---|------|-------|-------|-------|----------|----------|----------|----------|----------|----------|
| <i>CG7630</i>     | FBgn0040793 | FBpp0074979   | Cobs_01617 | 1 | 7.82 | 8.13  | 8.27  | 8.86  | 8.32E-02 | 9.35E-05 | 2.15E-01 | 3.35E-03 | 5.70E-01 | 3.10E-02 |
| <i>CG1444</i>     | FBgn0029975 | FBpp0071047   | Cobs_01644 | 1 | 6.42 | 6.76  | 6.61  | 7.57  | 6.95E-01 | 3.57E-03 | 4.17E-01 | 3.68E-02 | 7.14E-01 | 2.80E-02 |
| <i>CG12975</i>    | FBgn0037061 | FBpp0077965   | Cobs_01684 | 1 | 1.46 | 1.44  | 1.13  | 2.25  | 4.05E-01 | 3.73E-02 | 9.61E-01 | 3.77E-02 | 4.02E-01 | 9.24E-03 |
| <i>CG8547</i>     | FBgn0033919 | FBpp0290422   | Cobs_01820 | 1 | 7.78 | 7.69  | 7.64  | 7.15  | 4.21E-01 | 1.60E-04 | 5.93E-01 | 9.81E-04 | 7.80E-01 | 5.90E-03 |
| <i>CG31075</i>    | FBgn0051075 | FBpp0084452   | Cobs_01821 | 1 | 9.05 | 8.58  | 8.59  | 10.28 | 4.93E-01 | 3.11E-02 | 4.53E-01 | 4.13E-03 | 9.86E-01 | 1.08E-02 |
| <i>CG40002</i>    | FBgn0058002 | FBpp0112496   | Cobs_01829 | 0 | 5.36 | 5.62  | 5.61  | 6.31  | 1.99E-01 | 1.61E-05 | 1.74E-01 | 5.38E-04 | 9.89E-01 | 1.39E-03 |
| <i>Mfe2</i>       | FBgn0030731 | FBpp0073988   | Cobs_01914 | 1 | 7.29 | 7.62  | 8.03  | 8.83  | 2.12E-02 | 1.47E-05 | 2.78E-01 | 2.03E-04 | 1.53E-01 | 1.75E-02 |
| <i>Spase25</i>    | FBgn0030306 | FBpp0073355   | Cobs_02047 | 1 | 5.49 | 5.67  | 5.74  | 6.75  | 5.57E-01 | 5.66E-04 | 6.90E-01 | 2.36E-03 | 8.51E-01 | 9.41E-03 |
| <i>SmG</i>        | FBgn0261791 | FBpp0111906   | Cobs_02077 | 1 | 3.78 | 3.84  | 3.74  | 4.39  | 9.00E-01 | 2.15E-03 | 8.31E-01 | 5.61E-03 | 6.88E-01 | 4.07E-03 |
| <i>trio</i>       | FBgn0024277 | FBpp0072540   | Cobs_02128 | 1 | 8.14 | 8.13  | 8.15  | 7.85  | 9.31E-01 | 8.81E-03 | 9.69E-01 | 1.10E-02 | 8.82E-01 | 1.58E-02 |
| <i>NA</i>         | NA          | No hits found | Cobs_02174 | 0 | 8.22 | 8.15  | 7.93  | 6.69  | 4.82E-01 | 7.26E-05 | 8.76E-01 | 1.50E-04 | 5.57E-01 | 2.40E-03 |
| <i>CG32549</i>    | FBgn0052549 | FBpp0074343   | Cobs_02193 | 1 | 6.11 | 6.62  | 6.70  | 7.30  | 1.86E-02 | 1.51E-05 | 2.82E-02 | 3.54E-03 | 7.42E-01 | 1.90E-02 |
| <i>CG14482</i>    | FBgn0034245 | FBpp0086062   | Cobs_02410 | 1 | 5.21 | 5.14  | 5.34  | 6.17  | 6.03E-01 | 9.45E-05 | 8.15E-01 | 7.67E-05 | 3.68E-01 | 1.71E-03 |
| <i>zetaCOP</i>    | FBgn0040512 | FBpp0075111   | Cobs_02476 | 1 | 5.32 | 5.55  | 5.72  | 6.16  | 4.87E-02 | 6.59E-05 | 2.61E-01 | 1.79E-03 | 3.47E-01 | 3.42E-02 |
| <i>CG33767</i>    | FBgn0053767 | FBpp0091029   | Cobs_02581 | 0 | 3.29 | 2.56  | 3.13  | 4.53  | 8.87E-01 | 3.55E-02 | 3.65E-01 | 5.31E-03 | 4.39E-01 | 4.10E-02 |
| <i>l(2)k12914</i> | FBgn0263852 | FBpp0079324   | Cobs_02752 | 1 | 5.75 | 5.61  | 5.85  | 6.38  | 7.28E-01 | 5.62E-03 | 5.93E-01 | 1.43E-03 | 2.96E-01 | 3.49E-02 |
| <i>CoVib</i>      | FBgn0031066 | FBpp0300889   | Cobs_02979 | 1 | 8.65 | 8.75  | 8.97  | 9.56  | 1.54E-01 | 7.24E-05 | 6.95E-01 | 3.01E-04 | 2.72E-01 | 1.21E-02 |
| <i>mRpL20</i>     | FBgn0036335 | FBpp0075631   | Cobs_03098 | 1 | 4.79 | 4.59  | 4.91  | 5.47  | 6.52E-01 | 4.18E-03 | 4.69E-01 | 7.29E-04 | 1.73E-01 | 3.35E-02 |
| <i>Syp</i>        | FBgn0038826 | FBpp0083367   | Cobs_03250 | 0 | 3.39 | 2.83  | 3.44  | 1.95  | 9.25E-01 | 4.05E-05 | 2.91E-02 | 1.03E-02 | 1.60E-02 | 1.80E-04 |
| -                 | -           | FBpp0271774   | Cobs_03253 | 1 | 7.82 | 7.66  | 7.58  | 7.03  | 1.61E-01 | 1.76E-05 | 3.14E-01 | 2.68E-04 | 6.67E-01 | 2.81E-03 |
| <i>gbb</i>        | FBgn0024234 | FBpp0072036   | Cobs_03282 | 1 | 4.25 | 3.74  | 3.65  | 3.03  | 1.11E-02 | 2.37E-05 | 2.60E-02 | 6.99E-03 | 6.62E-01 | 3.45E-02 |
| <i>Mtpalpha</i>   | FBgn0028479 | FBpp0079453   | Cobs_03321 | 0 | 9.91 | 10.28 | 10.32 | 11.27 | 3.46E-01 | 9.05E-04 | 3.76E-01 | 1.18E-02 | 9.24E-01 | 3.20E-02 |
| <i>Ucrh</i>       | FBgn0260008 | FBpp0290999   | Cobs_03334 | 1 | 6.25 | 6.28  | 6.35  | 7.05  | 7.34E-01 | 1.07E-03 | 9.38E-01 | 1.68E-03 | 7.69E-01 | 9.39E-03 |
| <i>CG1847</i>     | FBgn0030345 | FBpp0073411   | Cobs_03517 | 1 | 5.78 | 6.07  | 5.97  | 6.48  | 3.59E-01 | 2.88E-04 | 1.24E-01 | 2.08E-02 | 6.03E-01 | 1.16E-02 |
| <i>CG11377</i>    | FBgn0031217 | FBpp0077763   | Cobs_03724 | 1 | 2.32 | 1.98  | 2.60  | 3.48  | 5.32E-01 | 1.42E-03 | 3.50E-01 | 1.89E-04 | 7.77E-02 | 1.77E-02 |
| <i>zip</i>        | FBgn0265434 | FBpp0072306   | Cobs_03733 | 0 | 5.93 | 6.07  | 6.06  | 5.61  | 4.76E-01 | 2.87E-02 | 3.81E-01 | 2.97E-03 | 9.17E-01 | 9.62E-03 |
| -                 | -           | FBpp0088455   | Cobs_03782 | 1 | 5.97 | 6.02  | 6.17  | 6.56  | 2.01E-01 | 1.88E-04 | 7.93E-01 | 5.72E-04 | 2.83E-01 | 1.81E-02 |
| <i>bcn92</i>      | FBgn0013432 | FBpp0070415   | Cobs_03814 | 1 | 1.70 | 1.81  | 1.92  | 2.44  | 3.80E-01 | 2.34E-03 | 6.32E-01 | 1.31E-02 | 7.06E-01 | 4.83E-02 |
| <i>NA</i>         | NA          | No hits found | Cobs_03908 | 0 | 5.72 | 5.97  | 6.10  | 5.21  | 1.74E-01 | 4.49E-02 | 3.78E-01 | 4.66E-03 | 6.20E-01 | 3.29E-03 |



|                  |             |               |            |   |      |      |      |      |          |          |          |          |          |          |
|------------------|-------------|---------------|------------|---|------|------|------|------|----------|----------|----------|----------|----------|----------|
| <i>CG12395</i>   | FBgn0030722 | FBpp0074037   | Cobs_04057 | 1 | 3.57 | 3.53 | 3.62 | 4.09 | 7.56E-01 | 6.68E-03 | 9.32E-01 | 6.43E-03 | 6.40E-01 | 3.39E-02 |
| <i>LSm3</i>      | FBgn0051184 | FBpp0289873   | Cobs_04071 | 1 | 4.41 | 4.55 | 4.37 | 4.97 | 8.85E-01 | 8.92E-03 | 5.92E-01 | 4.58E-02 | 4.28E-01 | 1.26E-02 |
| <i>Neb-cGP</i>   | FBgn0083167 | FBpp0071384   | Cobs_04119 | 1 | 6.91 | 6.61 | 7.00 | 7.71 | 7.93E-01 | 2.43E-03 | 2.67E-01 | 1.42E-04 | 1.24E-01 | 1.53E-02 |
| <i>Ror</i>       | FBgn0010407 | FBpp0079568   | Cobs_04222 | 0 | 6.52 | 6.47 | 6.50 | 6.20 | 9.11E-01 | 1.42E-02 | 7.26E-01 | 4.40E-02 | 8.13E-01 | 4.14E-02 |
| <i>CG14661</i>   | FBgn0037288 | FBpp0297107   | Cobs_04238 | 1 | 4.46 | 4.53 | 4.54 | 3.16 | 8.71E-01 | 4.50E-03 | 8.47E-01 | 3.14E-03 | 9.86E-01 | 7.63E-03 |
| <i>CG10407</i>   | FBgn0038395 | FBpp0082691   | Cobs_04249 | 0 | 6.80 | 7.03 | 6.86 | 5.04 | 8.90E-01 | 1.88E-05 | 5.45E-01 | 6.92E-06 | 6.48E-01 | 9.13E-05 |
| <i>CG8909</i>    | FBgn0030706 | FBpp0290880   | Cobs_04252 | 0 | 8.98 | 8.47 | 8.32 | 7.65 | 3.95E-03 | 6.68E-07 | 1.41E-02 | 2.29E-04 | 4.79E-01 | 4.51E-03 |
| -                | -           | FBpp0112185   | Cobs_04614 | 1 | 4.45 | 4.93 | 4.94 | 3.54 | 9.63E-02 | 5.18E-03 | 8.59E-02 | 1.01E-04 | 9.86E-01 | 3.36E-04 |
| <i>l(1)G0156</i> | FBgn0027291 | FBpp0300338   | Cobs_04656 | 0 | 2.09 | 2.50 | 2.21 | 1.23 | 6.37E-01 | 2.41E-02 | 1.50E-01 | 8.80E-04 | 3.49E-01 | 1.47E-02 |
| <i>CG1887</i>    | FBgn0035290 | FBpp0271769   | Cobs_04659 | 1 | 4.07 | 4.45 | 3.96 | 2.39 | 7.59E-01 | 6.93E-05 | 1.99E-01 | 1.00E-05 | 7.56E-02 | 6.31E-04 |
| <i>CG14223</i>   | FBgn0031053 | FBpp0074527   | Cobs_04778 | 1 | 4.19 | 3.82 | 3.88 | 3.17 | 3.07E-01 | 1.40E-03 | 1.81E-01 | 4.88E-02 | 8.06E-01 | 4.17E-02 |
| <i>apt</i>       | FBgn0015903 | FBpp0071977   | Cobs_04803 | 1 | 7.61 | 7.92 | 7.97 | 8.72 | 1.07E-01 | 8.43E-06 | 1.42E-01 | 3.26E-04 | 8.32E-01 | 1.96E-03 |
| <i>CrzR</i>      | FBgn0036278 | FBpp0075721   | Cobs_04898 | 1 | 5.64 | 5.92 | 5.67 | 5.08 | 9.31E-01 | 5.46E-03 | 1.75E-01 | 1.78E-04 | 1.92E-01 | 1.06E-02 |
| <i>Buffy</i>     | FBgn0040491 | FBpp0087182   | Cobs_04933 | 0 | 5.85 | 5.68 | 5.60 | 5.20 | 1.76E-01 | 4.81E-04 | 3.79E-01 | 6.56E-03 | 6.29E-01 | 4.11E-02 |
| <i>CG43386</i>   | FBgn0263216 | FBpp0300232   | Cobs_04948 | 0 | 5.91 | 8.06 | 6.63 | 4.81 | 1.13E-01 | 1.22E-02 | 1.49E-05 | 3.81E-07 | 1.06E-03 | 6.31E-04 |
| <i>NA</i>        | NA          | No hits found | Cobs_04964 | 0 | 1.77 | 1.73 | 1.33 | 3.13 | 5.43E-01 | 1.40E-03 | 9.81E-01 | 2.02E-03 | 5.26E-01 | 9.49E-04 |
| <i>ey</i>        | FBgn0005558 | FBpp0088299   | Cobs_04966 | 1 | 4.23 | 4.84 | 3.73 | 5.45 | 2.15E-01 | 2.16E-04 | 4.47E-02 | 4.54E-02 | 1.19E-03 | 7.53E-05 |
| <i>toy</i>       | FBgn0019650 | FBpp0088249   | Cobs_04974 | 0 | 1.56 | 1.98 | 1.05 | 2.95 | 3.49E-01 | 5.48E-04 | 3.11E-01 | 1.10E-02 | 3.14E-02 | 3.00E-04 |
| <i>ey</i>        | FBgn0005558 | FBpp0088300   | Cobs_04975 | 0 | 1.45 | 1.73 | 1.09 | 2.96 | 6.99E-01 | 5.59E-04 | 5.73E-01 | 3.84E-03 | 2.67E-01 | 7.30E-04 |
| <i>Con</i>       | FBgn0005775 | FBpp0073231   | Cobs_05086 | 1 | 4.08 | 3.86 | 3.81 | 4.44 | 2.56E-01 | 4.93E-02 | 3.38E-01 | 4.66E-03 | 8.59E-01 | 5.87E-03 |
| <i>bai</i>       | FBgn0045866 | FBpp0084133   | Cobs_05263 | 1 | 7.26 | 7.28 | 7.07 | 7.81 | 5.51E-01 | 4.19E-02 | 9.70E-01 | 4.92E-02 | 4.64E-01 | 1.71E-02 |
| <i>rdgB</i>      | FBgn0003218 | FBpp0290748   | Cobs_05354 | 1 | 6.28 | 6.40 | 6.40 | 5.93 | 5.21E-01 | 2.93E-02 | 4.81E-01 | 4.53E-03 | 9.83E-01 | 1.11E-02 |
| <i>CG8386</i>    | FBgn0034061 | FBpp0086402   | Cobs_05374 | 1 | 4.40 | 4.71 | 4.76 | 5.38 | 1.48E-01 | 7.13E-05 | 1.95E-01 | 2.99E-03 | 8.58E-01 | 1.05E-02 |
| <i>ssh</i>       | FBgn0029157 | FBpp0290828   | Cobs_05445 | 1 | 4.96 | 4.93 | 4.86 | 4.37 | 5.78E-01 | 5.55E-04 | 8.98E-01 | 1.12E-03 | 6.51E-01 | 8.28E-03 |
| <i>Tep3</i>      | FBgn0041181 | FBpp0079101   | Cobs_05553 | 0 | 7.89 | 7.80 | 8.09 | 7.27 | 3.71E-01 | 2.37E-03 | 6.93E-01 | 9.16E-03 | 1.31E-01 | 6.77E-04 |
| <i>CG14608</i>   | FBgn0037487 | FBpp0292311   | Cobs_05843 | 0 | 4.83 | 4.48 | 4.69 | 3.71 | 6.86E-01 | 4.69E-04 | 2.71E-01 | 1.06E-02 | 5.16E-01 | 4.74E-03 |
| <i>Cyp6a13</i>   | FBgn0033304 | FBpp0087770   | Cobs_05890 | 0 | 7.58 | 8.74 | 7.92 | 9.86 | 5.99E-01 | 1.66E-04 | 3.69E-02 | 4.56E-02 | 1.32E-01 | 3.17E-03 |
| <i>CG43143</i>   | FBgn0262617 | FBpp0293890   | Cobs_05948 | 1 | 7.44 | 7.58 | 7.44 | 7.21 | 9.56E-01 | 1.95E-02 | 1.83E-01 | 6.33E-04 | 1.38E-01 | 4.64E-02 |
| <i>Tmhs</i>      | FBgn0262624 | FBpp0072717   | Cobs_05950 | 1 | 4.65 | 4.11 | 4.01 | 3.56 | 1.88E-03 | 5.49E-06 | 4.34E-03 | 7.00E-03 | 6.08E-01 | 4.14E-02 |

|                   |             |             |            |   |      |      |      |       |          |          |          |          |          |          |
|-------------------|-------------|-------------|------------|---|------|------|------|-------|----------|----------|----------|----------|----------|----------|
| <i>Nipsnap</i>    | FBgn0030724 | FBpp0074034 | Cobs_06074 | 1 | 5.22 | 5.42 | 5.62 | 6.26  | 1.27E-01 | 1.04E-04 | 4.25E-01 | 1.37E-03 | 4.47E-01 | 1.90E-02 |
| <i>CG8543</i>     | FBgn0035787 | FBpp0076573 | Cobs_06084 | 0 | 2.91 | 2.32 | 4.21 | 7.10  | 2.60E-01 | 5.16E-04 | 8.70E-01 | 1.09E-03 | 1.75E-01 | 1.36E-02 |
| <i>CG6180</i>     | FBgn0032453 | FBpp0079979 | Cobs_06147 | 1 | 7.90 | 8.37 | 8.07 | 9.20  | 6.62E-01 | 1.91E-04 | 1.53E-01 | 1.08E-02 | 3.54E-01 | 2.92E-03 |
| <i>scu</i>        | FBgn0021765 | FBpp0074285 | Cobs_06465 | 1 | 8.25 | 8.42 | 8.86 | 10.47 | 3.10E-01 | 1.51E-04 | 7.93E-01 | 4.54E-04 | 4.22E-01 | 9.50E-03 |
| <i>CG10621</i>    | FBgn0032726 | FBpp0080732 | Cobs_06480 | 1 | 4.65 | 4.66 | 5.19 | 6.17  | 2.51E-01 | 5.27E-04 | 9.98E-01 | 7.29E-04 | 2.04E-01 | 2.77E-02 |
| <i>CG18641</i>    | FBgn0031426 | FBpp0297922 | Cobs_06497 | 1 | 4.54 | 5.87 | 4.41 | 3.65  | 7.53E-01 | 9.94E-03 | 5.07E-05 | 5.66E-07 | 2.31E-05 | 4.67E-02 |
| <i>CCHa2-R</i>    | FBgn0033058 | FBpp0085328 | Cobs_06642 | 1 | 2.41 | 2.18 | 2.30 | 3.32  | 8.84E-01 | 1.83E-03 | 5.91E-01 | 6.78E-04 | 6.98E-01 | 3.30E-03 |
| <i>CG32795</i>    | FBgn0040384 | FBpp0089092 | Cobs_06712 | 1 | 6.59 | 6.69 | 6.82 | 7.94  | 4.79E-01 | 3.97E-05 | 7.67E-01 | 1.18E-04 | 6.74E-01 | 1.08E-03 |
| <i>obst-E</i>     | FBgn0031737 | FBpp0078794 | Cobs_06870 | 1 | 7.59 | 8.57 | 7.31 | 6.24  | 5.45E-01 | 9.26E-04 | 1.49E-02 | 4.42E-06 | 1.90E-03 | 1.50E-02 |
| <i>GXIVsPLA2</i>  | FBgn0036545 | FBpp0075264 | Cobs_06960 | 1 | 6.89 | 7.17 | 7.10 | 7.74  | 3.37E-01 | 1.05E-04 | 1.74E-01 | 5.25E-03 | 7.70E-01 | 5.99E-03 |
| <i>CG10399</i>    | FBgn0031877 | FBpp0078979 | Cobs_06962 | 1 | 3.49 | 3.67 | 4.08 | 4.86  | 1.12E-01 | 1.88E-04 | 6.53E-01 | 1.04E-03 | 2.36E-01 | 2.86E-02 |
| <i>CG31344</i>    | FBgn0051344 | FBpp0082590 | Cobs_06967 | 0 | 0.53 | 0.90 | 0.84 | 2.36  | 6.91E-01 | 1.29E-03 | 6.69E-01 | 5.76E-03 | 9.86E-01 | 1.01E-02 |
| <i>Fur1</i>       | FBgn0004509 | FBpp0089026 | Cobs_07103 | 0 | 3.77 | 4.23 | 4.01 | 4.76  | 4.20E-01 | 4.81E-04 | 8.91E-02 | 4.70E-02 | 4.02E-01 | 1.16E-02 |
| <i>CG30415</i>    | FBgn0250838 | FBpp0071940 | Cobs_07296 | 1 | 6.07 | 6.26 | 6.36 | 7.15  | 1.55E-01 | 5.49E-06 | 3.42E-01 | 7.07E-05 | 6.18E-01 | 6.91E-04 |
| <i>CG17111</i>    | FBgn0039048 | FBpp0292542 | Cobs_07327 | 1 | 2.61 | 2.02 | 2.46 | 3.73  | 8.62E-01 | 1.47E-02 | 3.08E-01 | 1.67E-03 | 3.95E-01 | 1.85E-02 |
| <i>Asx</i>        | FBgn0261823 | FBpp0086622 | Cobs_07337 | 1 | 6.99 | 6.94 | 6.89 | 6.66  | 3.98E-01 | 1.77E-03 | 6.64E-01 | 7.55E-03 | 6.75E-01 | 4.26E-02 |
| -                 | -           | FBpp0271728 | Cobs_07353 | 1 | 6.39 | 6.50 | 6.41 | 5.97  | 9.35E-01 | 1.25E-02 | 5.71E-01 | 2.74E-03 | 6.20E-01 | 2.16E-02 |
| <i>CG2121</i>     | FBgn0033289 | FBpp0087842 | Cobs_07403 | 1 | 2.92 | 3.15 | 2.77 | 1.96  | 7.45E-01 | 9.94E-03 | 4.91E-01 | 2.03E-03 | 2.35E-01 | 4.64E-02 |
| <i>Prestin</i>    | FBgn0036770 | FBpp0074919 | Cobs_07452 | 1 | 4.62 | 4.66 | 4.80 | 5.31  | 4.83E-01 | 2.31E-03 | 8.92E-01 | 4.59E-03 | 5.52E-01 | 3.57E-02 |
| <i>CG32138</i>    | FBgn0052138 | FBpp0075518 | Cobs_07498 | 1 | 7.42 | 7.55 | 7.39 | 7.06  | 8.84E-01 | 1.24E-02 | 4.23E-01 | 1.47E-03 | 2.83E-01 | 4.14E-02 |
| <i>Cda4</i>       | FBgn0052499 | FBpp0077054 | Cobs_07545 | 1 | 7.14 | 7.06 | 7.00 | 6.35  | 6.31E-01 | 1.50E-03 | 7.74E-01 | 4.34E-03 | 8.41E-01 | 1.72E-02 |
| <i>CG5590</i>     | FBgn0039537 | FBpp0084585 | Cobs_07621 | 1 | 6.68 | 6.40 | 6.60 | 7.37  | 8.30E-01 | 9.30E-03 | 3.37E-01 | 7.65E-04 | 4.76E-01 | 1.13E-02 |
| <i>CG1443</i>     | FBgn0039620 | FBpp0084714 | Cobs_07699 | 1 | 6.25 | 6.23 | 6.06 | 4.64  | 6.36E-01 | 5.53E-05 | 9.61E-01 | 9.24E-05 | 6.34E-01 | 8.10E-04 |
| <i>alpha-Est9</i> | FBgn0015577 | FBpp0291550 | Cobs_07705 | 0 | 4.91 | 6.00 | 5.77 | 7.21  | 1.65E-01 | 2.24E-04 | 6.27E-02 | 2.96E-02 | 7.15E-01 | 2.30E-02 |
| -                 | -           | FBpp0110154 | Cobs_07719 | 1 | 8.37 | 8.29 | 8.37 | 7.84  | 9.85E-01 | 1.24E-03 | 6.52E-01 | 5.62E-03 | 6.05E-01 | 3.91E-03 |
| -                 | -           | FBpp0292776 | Cobs_07810 | 1 | 7.35 | 7.55 | 7.51 | 7.93  | 3.92E-01 | 8.87E-04 | 2.54E-01 | 2.12E-02 | 8.47E-01 | 2.59E-02 |
| <i>Nep2</i>       | FBgn0027570 | FBpp0078531 | Cobs_07833 | 1 | 6.69 | 6.74 | 6.69 | 6.19  | 9.92E-01 | 2.75E-02 | 8.61E-01 | 1.69E-02 | 8.58E-01 | 4.96E-02 |
| <i>Pomp</i>       | FBgn0032884 | FBpp0080943 | Cobs_07896 | 1 | 6.03 | 5.68 | 5.99 | 6.47  | 8.69E-01 | 1.42E-02 | 5.65E-02 | 1.23E-04 | 7.88E-02 | 1.87E-02 |
| <i>l(1)G0230</i>  | FBgn0028342 | FBpp0071373 | Cobs_07902 | 1 | 5.02 | 5.28 | 5.68 | 6.53  | 8.76E-03 | 5.94E-07 | 2.65E-01 | 1.00E-05 | 7.82E-02 | 1.32E-03 |

|                  |             |               |            |   |       |       |       |       |          |          |          |          |          |          |
|------------------|-------------|---------------|------------|---|-------|-------|-------|-------|----------|----------|----------|----------|----------|----------|
| NA               | NA          | No hits found | Cobs_08118 | 0 | 2.78  | 3.00  | 3.00  | 3.50  | 4.09E-01 | 2.43E-03 | 4.14E-01 | 2.86E-02 | 9.89E-01 | 4.39E-02 |
| <i>Klp10A</i>    | FBgn0030268 | FBpp0073335   | Cobs_08259 | 1 | 6.29  | 6.13  | 6.11  | 5.80  | 2.01E-01 | 4.18E-04 | 2.12E-01 | 1.39E-02 | 9.40E-01 | 3.29E-02 |
| <i>blw</i>       | FBgn0011211 | FBpp0071794   | Cobs_08268 | 1 | 10.25 | 10.37 | 10.59 | 11.19 | 1.47E-01 | 7.69E-05 | 6.40E-01 | 3.99E-04 | 2.96E-01 | 1.38E-02 |
| <i>CG6543</i>    | FBgn0033879 | FBpp0086769   | Cobs_08389 | 1 | 6.62  | 6.82  | 7.03  | 7.91  | 3.17E-01 | 7.21E-04 | 6.27E-01 | 3.54E-03 | 5.92E-01 | 2.98E-02 |
| <i>RpL21</i>     | FBgn0032987 | FBpp0085314   | Cobs_08471 | 0 | 7.14  | 6.56  | 7.20  | 7.75  | 8.47E-01 | 6.65E-03 | 1.19E-02 | 1.66E-05 | 4.89E-03 | 2.89E-02 |
| <i>Lip4</i>      | FBgn0032264 | FBpp0079682   | Cobs_08563 | 0 | 3.97  | 6.41  | 3.74  | 2.23  | 6.08E-01 | 3.76E-03 | 7.53E-06 | 3.81E-07 | 1.80E-06 | 2.98E-02 |
| <i>Gale</i>      | FBgn0035147 | FBpp0297771   | Cobs_08572 | 0 | 6.01  | 6.33  | 6.01  | 5.24  | 9.70E-01 | 2.26E-03 | 2.15E-01 | 1.14E-04 | 1.71E-01 | 7.69E-03 |
| <i>RFeSP</i>     | FBgn0021906 | FBpp0077581   | Cobs_08586 | 1 | 7.53  | 7.81  | 7.79  | 8.28  | 2.68E-01 | 8.66E-04 | 1.97E-01 | 2.94E-02 | 9.33E-01 | 4.24E-02 |
| <i>prc</i>       | FBgn0028573 | FBpp0075796   | Cobs_08674 | 1 | 2.71  | 2.37  | 2.40  | 3.74  | 6.02E-01 | 1.22E-02 | 5.64E-01 | 3.55E-03 | 9.68E-01 | 7.09E-03 |
| <i>Cdk4</i>      | FBgn0016131 | FBpp0086251   | Cobs_08682 | 1 | 5.74  | 5.44  | 5.79  | 6.38  | 8.34E-01 | 4.62E-04 | 8.21E-02 | 1.00E-05 | 3.53E-02 | 3.16E-03 |
| NA               | NA          | No hits found | Cobs_08683 | 0 | 6.12  | 6.22  | 6.39  | 7.06  | 1.89E-01 | 1.91E-05 | 6.37E-01 | 9.39E-05 | 3.84E-01 | 2.39E-03 |
| <i>CG17717</i>   | FBgn0029877 | FBpp0070905   | Cobs_08699 | 0 | 3.27  | 3.76  | 3.71  | 2.30  | 2.79E-01 | 1.21E-02 | 2.15E-01 | 7.17E-04 | 9.24E-01 | 2.35E-03 |
| <i>Tom7</i>      | FBgn0033357 | FBpp0087738   | Cobs_08755 | 1 | 6.77  | 7.17  | 7.03  | 7.57  | 1.27E-01 | 1.61E-05 | 1.22E-02 | 1.10E-02 | 3.80E-01 | 3.21E-03 |
| <i>CG16854</i>   | FBgn0032338 | FBpp0298000   | Cobs_08943 | 1 | 4.70  | 4.66  | 4.76  | 5.75  | 9.28E-01 | 1.62E-02 | 9.35E-01 | 1.44E-02 | 8.34E-01 | 4.14E-02 |
| <i>CG10226</i>   | FBgn0035695 | FBpp0076720   | Cobs_08947 | 0 | 4.13  | 4.28  | 4.51  | 5.06  | 8.71E-02 | 6.44E-05 | 5.10E-01 | 5.97E-04 | 2.71E-01 | 1.67E-02 |
| <i>Spn43Ab</i>   | FBgn0024293 | FBpp0099762   | Cobs_08948 | 0 | 4.72  | 4.79  | 4.75  | 5.25  | 9.13E-01 | 6.11E-03 | 7.68E-01 | 1.78E-02 | 8.50E-01 | 2.01E-02 |
| <i>CG14830</i>   | FBgn0035755 | FBpp0076598   | Cobs_09039 | 1 | 4.17  | 4.47  | 4.29  | 3.64  | 6.19E-01 | 1.99E-02 | 1.81E-01 | 7.70E-04 | 4.31E-01 | 1.11E-02 |
| <i>Rpl118</i>    | FBgn0003275 | FBpp0078433   | Cobs_09083 | 1 | 4.16  | 4.31  | 4.61  | 5.28  | 1.71E-01 | 4.37E-04 | 7.44E-01 | 1.58E-03 | 2.80E-01 | 3.66E-02 |
| <i>sens</i>      | FBgn0002573 | FBpp0075596   | Cobs_09084 | 1 | 1.82  | 1.64  | 1.36  | 3.12  | 4.57E-01 | 2.43E-03 | 8.24E-01 | 2.02E-03 | 6.01E-01 | 1.08E-03 |
| <i>ari-1</i>     | FBgn0017418 | FBpp0297199   | Cobs_09112 | 0 | 5.03  | 5.02  | 4.94  | 4.34  | 7.36E-01 | 9.71E-03 | 9.43E-01 | 1.40E-02 | 7.68E-01 | 4.95E-02 |
| <i>Btk29A</i>    | FBgn0003502 | FBpp0111748   | Cobs_09318 | 1 | 6.74  | 6.39  | 6.38  | 5.80  | 7.57E-02 | 2.23E-05 | 6.58E-02 | 2.74E-03 | 9.63E-01 | 8.06E-03 |
| <i>CG18624</i>   | FBgn0029971 | FBpp0290122   | Cobs_09338 | 1 | 5.68  | 5.94  | 5.99  | 6.47  | 1.27E-01 | 1.26E-04 | 1.66E-01 | 6.66E-03 | 8.47E-01 | 2.33E-02 |
| <i>CG1746</i>    | FBgn0039830 | FBpp0293653   | Cobs_09350 | 1 | 9.22  | 9.45  | 9.61  | 10.14 | 1.04E-01 | 1.36E-04 | 3.37E-01 | 2.54E-03 | 4.68E-01 | 3.33E-02 |
| <i>CG17005</i>   | FBgn0032109 | FBpp0271694   | Cobs_09388 | 0 | 5.29  | 5.71  | 5.62  | 6.25  | 2.32E-02 | 3.87E-07 | 2.95E-03 | 2.23E-04 | 5.52E-01 | 2.27E-04 |
| <i>CG12948</i>   | FBgn0037739 | FBpp0081645   | Cobs_09457 | 1 | 4.57  | 4.56  | 4.54  | 5.13  | 8.83E-01 | 1.69E-03 | 9.31E-01 | 1.62E-03 | 9.47E-01 | 3.16E-03 |
| <i>MED10</i>     | FBgn0036581 | FBpp0290696   | Cobs_09608 | 1 | 3.84  | 3.81  | 3.97  | 4.57  | 5.57E-01 | 1.50E-03 | 9.58E-01 | 1.72E-03 | 4.64E-01 | 1.90E-02 |
| <i>l(2)06225</i> | FBgn0010612 | FBpp0297136   | Cobs_09619 | 1 | 8.36  | 8.39  | 8.50  | 9.28  | 6.08E-01 | 1.22E-04 | 9.31E-01 | 2.12E-04 | 6.37E-01 | 2.50E-03 |
| <i>CG31475</i>   | FBgn0051475 | FBpp0083149   | Cobs_09626 | 1 | 2.60  | 3.94  | 2.88  | 1.42  | 4.46E-01 | 1.11E-02 | 8.83E-05 | 2.26E-06 | 6.14E-04 | 4.49E-03 |
| <i>hpo</i>       | FBgn0261456 | FBpp0085688   | Cobs_09740 | 1 | 5.42  | 5.43  | 5.43  | 5.08  | 9.67E-01 | 2.17E-02 | 9.67E-01 | 2.10E-02 | 9.99E-01 | 3.71E-02 |

|                     |             |             |            |   |      |      |       |       |          |          |          |          |          |          |
|---------------------|-------------|-------------|------------|---|------|------|-------|-------|----------|----------|----------|----------|----------|----------|
| <i>CG34191</i>      | FBgn0085220 | FBpp0111299 | Cobs_09754 | 1 | 5.66 | 5.49 | 5.74  | 6.23  | 7.97E-01 | 1.03E-02 | 5.19E-01 | 1.91E-03 | 2.92E-01 | 4.46E-02 |
| <i>l(1)G0255</i>    | FBgn0028336 | FBpp0070915 | Cobs_09792 | 0 | 7.19 | 7.61 | 7.61  | 8.11  | 2.40E-02 | 8.85E-06 | 1.36E-02 | 4.59E-03 | 9.81E-01 | 1.05E-02 |
| <i>MICAL-like</i>   | FBgn0036333 | FBpp0075632 | Cobs_09883 | 1 | 7.10 | 6.73 | 6.73  | 6.37  | 2.96E-02 | 3.97E-05 | 2.00E-02 | 1.83E-02 | 9.91E-01 | 3.62E-02 |
| <i>eya</i>          | FBgn0000320 | FBpp0297250 | Cobs_09948 | 1 | 6.07 | 5.53 | 5.53  | 5.03  | 1.48E-02 | 2.37E-05 | 9.83E-03 | 2.10E-02 | 9.90E-01 | 3.86E-02 |
| <i>mRpS28</i>       | FBgn0034361 | FBpp0085893 | Cobs_10008 | 1 | 5.16 | 5.06 | 5.04  | 5.59  | 6.41E-01 | 3.36E-02 | 7.29E-01 | 1.34E-02 | 9.06E-01 | 1.83E-02 |
| <i>scrib</i>        | FBgn0263289 | FBpp0300848 | Cobs_10082 | 1 | 8.75 | 8.71 | 8.85  | 8.45  | 5.20E-01 | 2.20E-02 | 8.11E-01 | 4.82E-02 | 2.95E-01 | 9.11E-03 |
| <i>Patj</i>         | FBgn0067864 | FBpp0072664 | Cobs_10096 | 0 | 6.69 | 6.38 | 6.40  | 5.90  | 1.51E-01 | 1.16E-04 | 1.08E-01 | 1.03E-02 | 9.44E-01 | 1.75E-02 |
| <i>Mipp1</i>        | FBgn0026061 | FBpp0075157 | Cobs_10121 | 1 | 5.42 | 5.76 | 4.91  | 6.44  | 1.74E-01 | 2.54E-03 | 3.29E-01 | 4.05E-02 | 1.10E-02 | 3.36E-04 |
| <i>CoVb</i>         | FBgn0031830 | FBpp0078918 | Cobs_10226 | 1 | 7.29 | 7.31 | 7.58  | 8.21  | 2.63E-01 | 2.24E-04 | 9.61E-01 | 3.25E-04 | 2.34E-01 | 1.54E-02 |
| <i>unc-45</i>       | FBgn0010812 | FBpp0081284 | Cobs_10249 | 1 | 5.95 | 5.85 | 5.99  | 5.51  | 8.12E-01 | 1.23E-03 | 5.12E-01 | 9.68E-03 | 2.96E-01 | 1.96E-03 |
| <i>CG9319</i>       | FBgn0032881 | FBpp0080989 | Cobs_10290 | 1 | 4.52 | 4.84 | 4.48  | 5.55  | 8.78E-01 | 5.12E-04 | 3.31E-01 | 8.88E-03 | 2.04E-01 | 9.89E-04 |
| <i>Vha36-1</i>      | FBgn0022097 | FBpp0086468 | Cobs_10291 | 1 | 6.04 | 6.53 | 6.69  | 7.37  | 3.32E-02 | 3.78E-05 | 8.47E-02 | 3.63E-03 | 5.96E-01 | 2.98E-02 |
| <i>CG3621</i>       | FBgn0025839 | FBpp0070370 | Cobs_10333 | 1 | 5.56 | 5.63 | 5.78  | 6.30  | 1.75E-01 | 1.99E-05 | 6.99E-01 | 7.94E-05 | 3.13E-01 | 2.54E-03 |
| <i>ColV</i>         | FBgn0032833 | FBpp0080836 | Cobs_10416 | 1 | 8.13 | 8.56 | 8.56  | 9.23  | 4.19E-02 | 5.49E-06 | 3.14E-02 | 1.28E-03 | 9.75E-01 | 3.92E-03 |
| <i>Map205</i>       | FBgn0002645 | FBpp0085234 | Cobs_10625 | 0 | 8.49 | 8.29 | 8.31  | 7.76  | 3.81E-01 | 1.83E-04 | 2.97E-01 | 3.92E-03 | 9.29E-01 | 7.98E-03 |
| -                   | -           | FBpp0289077 | Cobs_10629 | 1 | 3.09 | 2.99 | 3.01  | 3.64  | 8.21E-01 | 2.12E-02 | 6.91E-01 | 8.31E-03 | 8.75E-01 | 2.14E-02 |
| <i>fabp</i>         | FBgn0037913 | FBpp0099726 | Cobs_10640 | 0 | 9.69 | 9.93 | 10.05 | 12.28 | 7.62E-01 | 5.56E-03 | 8.41E-01 | 1.16E-02 | 9.08E-01 | 3.28E-02 |
| <i>Prx2540-1</i>    | FBgn0033520 | FBpp0087356 | Cobs_10693 | 1 | 9.88 | 9.84 | 10.10 | 11.16 | 6.84E-01 | 4.94E-03 | 9.44E-01 | 4.30E-03 | 5.69E-01 | 3.78E-02 |
| <i>Ciao1</i>        | FBgn0033972 | FBpp0086590 | Cobs_10910 | 1 | 5.24 | 5.49 | 5.66  | 6.29  | 1.08E-01 | 7.76E-05 | 3.37E-01 | 1.45E-03 | 4.92E-01 | 1.75E-02 |
| <i>CG42245</i>      | FBgn0250911 | FBpp0288791 | Cobs_11097 | 1 | 1.96 | 2.38 | 1.94  | 2.95  | 8.32E-01 | 1.51E-03 | 2.91E-01 | 2.94E-02 | 1.47E-01 | 2.20E-03 |
| <i>path</i>         | FBgn0036007 | FBpp0076156 | Cobs_11156 | 1 | 6.33 | 5.73 | 5.92  | 6.89  | 1.22E-01 | 1.83E-02 | 1.67E-02 | 5.25E-05 | 4.54E-01 | 8.28E-04 |
| <i>CG7970</i>       | FBgn0035252 | FBpp0072645 | Cobs_11468 | 1 | 5.19 | 5.51 | 5.62  | 6.35  | 1.29E-01 | 8.27E-05 | 2.54E-01 | 2.35E-03 | 6.77E-01 | 1.48E-02 |
| <i>Skeletor</i>     | FBgn0262717 | FBpp0296944 | Cobs_11504 | 1 | 8.61 | 8.06 | 7.78  | 7.06  | 1.88E-03 | 5.16E-07 | 2.00E-02 | 1.01E-04 | 2.13E-01 | 5.90E-03 |
| <i>Atox1</i>        | FBgn0052446 | FBpp0078080 | Cobs_11639 | 1 | 5.20 | 5.53 | 6.08  | 7.00  | 6.06E-02 | 1.26E-04 | 5.21E-01 | 1.05E-03 | 1.83E-01 | 4.59E-02 |
| <i>CG10470</i>      | FBgn0032746 | FBpp0080690 | Cobs_11742 | 1 | 6.41 | 6.64 | 6.83  | 7.51  | 1.37E-01 | 1.17E-04 | 4.12E-01 | 1.54E-03 | 4.79E-01 | 2.10E-02 |
| <i>Prosalph6</i>    | FBgn0250843 | FBpp0079538 | Cobs_11762 | 1 | 7.67 | 7.12 | 7.83  | 8.36  | 5.63E-01 | 2.83E-03 | 1.52E-02 | 1.00E-05 | 2.13E-03 | 3.57E-02 |
| <i>CG4933</i>       | FBgn0036615 | FBpp0075139 | Cobs_11772 | 1 | 2.13 | 2.51 | 2.43  | 3.07  | 4.19E-01 | 2.43E-03 | 3.20E-01 | 4.08E-02 | 8.86E-01 | 4.14E-02 |
| <i>CoVllc</i>       | FBgn0040773 | FBpp0087485 | Cobs_11799 | 1 | 7.65 | 7.79 | 7.88  | 8.50  | 4.02E-01 | 9.19E-04 | 6.28E-01 | 4.47E-03 | 7.15E-01 | 2.59E-02 |
| <i>alpha-Man-II</i> | FBgn0011740 | FBpp0081509 | Cobs_11929 | 1 | 7.01 | 6.81 | 7.10  | 7.59  | 7.39E-01 | 3.74E-03 | 3.27E-01 | 2.95E-04 | 1.37E-01 | 2.59E-02 |

|                   |             |               |            |   |      |      |      |       |          |          |          |          |          |          |
|-------------------|-------------|---------------|------------|---|------|------|------|-------|----------|----------|----------|----------|----------|----------|
| <i>CG8475</i>     | FBgn0031995 | FBpp0079254   | Cobs_11939 | 1 | 5.41 | 5.63 | 5.76 | 6.20  | 5.05E-02 | 3.32E-05 | 2.26E-01 | 9.54E-04 | 4.08E-01 | 1.67E-02 |
| <i>bbg</i>        | FBgn0087007 | FBpp0271931   | Cobs_12015 | 1 | 5.40 | 5.24 | 5.15 | 4.58  | 2.45E-01 | 2.24E-04 | 4.52E-01 | 2.39E-03 | 6.76E-01 | 1.47E-02 |
| <i>Mgat1</i>      | FBgn0034521 | FBpp0085571   | Cobs_12026 | 1 | 4.96 | 5.30 | 5.14 | 5.72  | 5.06E-01 | 8.66E-04 | 1.54E-01 | 4.13E-02 | 4.90E-01 | 1.47E-02 |
| <i>CG34172</i>    | FBgn0085201 | FBpp0300508   | Cobs_12046 | 0 | 7.29 | 7.28 | 7.56 | 8.35  | 2.47E-01 | 1.61E-05 | 9.51E-01 | 1.76E-05 | 1.65E-01 | 1.27E-03 |
| <i>CG5390</i>     | FBgn0032213 | FBpp0079653   | Cobs_12202 | 1 | 7.07 | 7.50 | 6.90 | 5.90  | 6.76E-01 | 5.45E-04 | 1.79E-01 | 2.88E-05 | 5.07E-02 | 6.21E-03 |
| <i>NA</i>         | NA          | No hits found | Cobs_12224 | 0 | 2.12 | 2.08 | 1.92 | -0.99 | 5.88E-01 | 9.60E-04 | 7.38E-01 | 2.99E-03 | 8.42E-01 | 1.05E-02 |
| <i>Dpit47</i>     | FBgn0266518 | FBpp0085479   | Cobs_12283 | 1 | 5.17 | 5.07 | 5.15 | 4.66  | 9.53E-01 | 1.27E-03 | 6.01E-01 | 7.15E-03 | 6.29E-01 | 4.73E-03 |
| <i>l(2)k09913</i> | FBgn0021979 | FBpp0071872   | Cobs_12423 | 1 | 5.54 | 5.64 | 5.86 | 6.55  | 2.28E-01 | 1.27E-04 | 7.37E-01 | 5.11E-04 | 3.64E-01 | 1.11E-02 |
| <i>Cpr62Bc</i>    | FBgn0035281 | FBpp0072748   | Cobs_12426 | 1 | 3.04 | 3.17 | 3.50 | 5.15  | 4.89E-01 | 1.91E-03 | 7.92E-01 | 6.19E-03 | 6.75E-01 | 2.63E-02 |
| <i>uif</i>        | FBgn0031879 | FBpp0288558   | Cobs_12438 | 1 | 8.61 | 8.01 | 8.09 | 7.51  | 2.32E-02 | 1.37E-05 | 5.31E-03 | 1.60E-02 | 7.39E-01 | 1.47E-02 |
| <i>Aldh-III</i>   | FBgn0010548 | FBpp0289706   | Cobs_12693 | 1 | 6.83 | 6.87 | 7.00 | 7.56  | 5.65E-01 | 3.22E-03 | 9.02E-01 | 5.63E-03 | 6.26E-01 | 3.87E-02 |
| <i>llp8</i>       | FBgn0036690 | FBpp0288660   | Cobs_12702 | 0 | 3.05 | 2.97 | 2.85 | 3.60  | 4.96E-01 | 3.69E-02 | 7.57E-01 | 1.70E-02 | 7.21E-01 | 1.20E-02 |
| <i>cyp33</i>      | FBgn0028382 | FBpp0086101   | Cobs_12945 | 1 | 6.34 | 6.59 | 6.80 | 7.60  | 1.26E-01 | 4.92E-05 | 4.11E-01 | 5.97E-04 | 4.49E-01 | 1.05E-02 |
| <i>Dbi</i>        | FBgn0010387 | FBpp0076624   | Cobs_13047 | 1 | 8.09 | 7.54 | 8.56 | 9.60  | 2.12E-01 | 9.45E-05 | 1.24E-01 | 4.42E-06 | 3.51E-03 | 1.05E-02 |
| <i>CG30499</i>    | FBgn0050499 | FBpp0088028   | Cobs_13152 | 1 | 5.18 | 5.18 | 5.20 | 5.85  | 9.53E-01 | 1.45E-02 | 9.80E-01 | 1.79E-02 | 9.69E-01 | 3.55E-02 |
| <i>CG4386</i>     | FBgn0034661 | FBpp0071657   | Cobs_13157 | 0 | 1.53 | 1.55 | 1.44 | 0.48  | 8.01E-01 | 9.68E-03 | 9.78E-01 | 1.08E-02 | 7.43E-01 | 3.91E-02 |
| <i>mt:ND5</i>     | FBgn0013684 | FBpp0100182   | Cobs_13776 | 1 | 6.82 | 6.84 | 7.03 | 7.71  | 5.31E-01 | 2.85E-03 | 9.51E-01 | 4.08E-03 | 5.33E-01 | 3.98E-02 |
| <i>mt:Col</i>     | FBgn0013674 | FBpp0100176   | Cobs_13778 | 1 | 9.07 | 8.96 | 8.98 | 9.55  | 7.37E-01 | 3.62E-02 | 6.73E-01 | 1.12E-02 | 9.57E-01 | 2.75E-02 |
| <i>CG34439</i>    | FBgn0085468 | FBpp0111652   | Cobs_13970 | 1 | 5.56 | 5.83 | 6.09 | 6.73  | 6.49E-02 | 6.81E-05 | 3.61E-01 | 1.10E-03 | 3.08E-01 | 2.75E-02 |
| <i>fabp</i>       | FBgn0037913 | FBpp0099728   | Cobs_14020 | 0 | 6.04 | 5.70 | 5.99 | 7.05  | 9.46E-01 | 3.26E-02 | 5.42E-01 | 6.55E-03 | 5.74E-01 | 4.72E-02 |
| <i>CG43333</i>    | FBgn0263038 | FBpp0297780   | Cobs_14341 | 1 | 3.61 | 3.78 | 3.87 | 2.21  | 6.82E-01 | 1.14E-02 | 7.67E-01 | 5.89E-03 | 9.15E-01 | 9.53E-03 |
| <i>CG42271</i>    | FBgn0259166 | FBpp0288890   | Cobs_14356 | 1 | 6.93 | 6.89 | 7.07 | 6.55  | 2.46E-01 | 1.37E-03 | 8.04E-01 | 3.52E-03 | 1.03E-01 | 3.05E-04 |
| <i>Prosbeta7</i>  | FBgn0250746 | FBpp0078449   | Cobs_14446 | 1 | 6.36 | 5.90 | 6.79 | 7.42  | 7.62E-02 | 3.51E-05 | 3.94E-02 | 5.66E-07 | 2.34E-04 | 1.24E-02 |
| <i>CG5188</i>     | FBgn0032247 | FBpp0079614   | Cobs_14451 | 1 | 5.25 | 5.29 | 5.66 | 6.10  | 3.97E-02 | 5.80E-05 | 8.20E-01 | 1.52E-04 | 4.71E-02 | 3.65E-02 |
| <i>Gpi1</i>       | FBgn0086448 | FBpp0298004   | Cobs_14459 | 1 | 4.28 | 4.46 | 4.32 | 4.96  | 9.08E-01 | 2.28E-03 | 4.98E-01 | 1.86E-02 | 5.66E-01 | 9.17E-03 |
| <i>CG9034</i>     | FBgn0040931 | FBpp0071278   | Cobs_14571 | 0 | 6.56 | 6.59 | 6.79 | 7.33  | 3.28E-01 | 5.66E-04 | 8.87E-01 | 1.12E-03 | 3.64E-01 | 2.39E-02 |
| <i>CG15434</i>    | FBgn0040705 | FBpp0077130   | Cobs_14623 | 1 | 3.16 | 3.51 | 3.39 | 4.50  | 6.41E-01 | 5.26E-04 | 4.56E-01 | 5.30E-03 | 8.09E-01 | 5.41E-03 |
| <i>CG11858</i>    | FBgn0039305 | FBpp0084190   | Cobs_14632 | 1 | 3.63 | 3.70 | 3.65 | 4.69  | 9.21E-01 | 1.60E-04 | 7.95E-01 | 5.72E-04 | 8.74E-01 | 7.81E-04 |
| <i>cnn</i>        | FBgn0013765 | FBpp0086822   | Cobs_14665 | 1 | 7.10 | 7.10 | 6.90 | 6.52  | 2.97E-01 | 1.03E-03 | 9.79E-01 | 1.11E-03 | 2.22E-01 | 4.24E-02 |

|                  |             |               |            |   |      |      |      |       |          |          |          |          |          |          |
|------------------|-------------|---------------|------------|---|------|------|------|-------|----------|----------|----------|----------|----------|----------|
| <i>CG3955</i>    | FBgn0033793 | FBpp0086893   | Cobs_14763 | 1 | 3.72 | 3.66 | 3.36 | 2.76  | 1.17E-01 | 3.90E-04 | 8.48E-01 | 9.70E-04 | 1.43E-01 | 4.43E-02 |
| <i>rols</i>      | FBgn0041096 | FBpp0075785   | Cobs_14999 | 1 | 6.63 | 6.33 | 6.41 | 5.89  | 1.40E-01 | 1.32E-05 | 2.63E-02 | 3.08E-03 | 5.35E-01 | 1.74E-03 |
| <i>mRpS14</i>    | FBgn0044030 | FBpp0074554   | Cobs_15014 | 1 | 5.01 | 4.78 | 5.07 | 5.70  | 8.46E-01 | 6.62E-03 | 4.50E-01 | 1.00E-03 | 2.73E-01 | 2.73E-02 |
| <i>CG42534</i>   | FBgn0260487 | FBpp0290120   | Cobs_15056 | 1 | 3.28 | 3.12 | 3.40 | 2.57  | 6.51E-01 | 1.07E-02 | 6.47E-01 | 4.57E-02 | 2.82E-01 | 7.69E-03 |
| <i>CG8399</i>    | FBgn0034067 | FBpp0086349   | Cobs_15110 | 1 | 4.48 | 4.55 | 4.39 | 3.84  | 7.72E-01 | 5.81E-03 | 7.87E-01 | 3.08E-03 | 4.97E-01 | 2.98E-02 |
| <i>CG3321</i>    | FBgn0038224 | FBpp0292847   | Cobs_15235 | 1 | 6.84 | 6.93 | 7.36 | 8.07  | 2.25E-02 | 2.33E-06 | 7.24E-01 | 1.00E-05 | 3.29E-02 | 3.43E-03 |
| -                | -           | FBpp0077365   | Cobs_15236 | 0 | 8.09 | 8.39 | 8.84 | 9.51  | 2.33E-02 | 3.78E-05 | 3.50E-01 | 5.59E-04 | 1.26E-01 | 4.58E-02 |
| <i>Prosbeta3</i> | FBgn0026380 | FBpp0081488   | Cobs_15275 | 1 | 6.89 | 6.59 | 7.10 | 7.71  | 4.57E-01 | 1.20E-03 | 2.41E-01 | 7.48E-05 | 3.43E-02 | 2.59E-02 |
| <i>ETH</i>       | FBgn0028738 | FBpp0072331   | Cobs_15291 | 1 | 4.76 | 4.42 | 4.54 | 5.04  | 2.25E-01 | 4.81E-02 | 3.97E-02 | 2.95E-04 | 4.44E-01 | 4.73E-03 |
| <i>NA</i>        | NA          | No hits found | Cobs_15296 | 0 | 1.58 | 2.08 | 1.77 | 2.76  | 6.04E-01 | 1.38E-03 | 2.03E-01 | 4.64E-02 | 4.82E-01 | 1.47E-02 |
| <i>pot</i>       | FBgn0250871 | FBpp0073432   | Cobs_15391 | 1 | 7.15 | 7.09 | 7.06 | 6.68  | 6.47E-01 | 3.92E-03 | 7.26E-01 | 1.30E-02 | 9.07E-01 | 3.49E-02 |
| <i>CG9344</i>    | FBgn0034564 | FBpp0071449   | Cobs_15511 | 1 | 8.95 | 8.84 | 9.18 | 7.84  | 6.72E-01 | 1.09E-02 | 8.42E-01 | 2.16E-02 | 4.55E-01 | 8.27E-03 |
| <i>CG8399</i>    | FBgn0034067 | FBpp0086349   | Cobs_15523 | 0 | 6.15 | 6.43 | 5.73 | 5.06  | 1.94E-01 | 6.78E-04 | 3.55E-01 | 7.92E-05 | 1.45E-02 | 4.67E-02 |
| <i>ldh</i>       | FBgn0001248 | FBpp0113041   | Cobs_15561 | 1 | 9.02 | 8.76 | 9.30 | 10.05 | 4.20E-01 | 1.56E-03 | 4.67E-01 | 2.26E-04 | 7.90E-02 | 3.66E-02 |
| <i>CG1407</i>    | FBgn0033474 | FBpp0087521   | Cobs_15678 | 1 | 6.52 | 6.66 | 6.67 | 7.12  | 4.39E-01 | 8.66E-04 | 4.72E-01 | 7.57E-03 | 9.40E-01 | 2.03E-02 |
| <i>CG4169</i>    | FBgn0250814 | FBpp0075069   | Cobs_15739 | 1 | 7.62 | 7.60 | 7.74 | 8.29  | 6.01E-01 | 8.93E-04 | 9.19E-01 | 7.41E-04 | 4.55E-01 | 1.22E-02 |
| <i>Nmda1</i>     | FBgn0013305 | FBpp0088815   | Cobs_15828 | 0 | 5.07 | 5.43 | 5.39 | 5.98  | 1.86E-01 | 1.29E-04 | 1.16E-01 | 1.09E-02 | 8.72E-01 | 1.42E-02 |
| <i>Rpl26</i>     | FBgn0036825 | FBpp0074833   | Cobs_15836 | 1 | 6.59 | 6.73 | 6.62 | 7.24  | 9.07E-01 | 2.44E-03 | 5.46E-01 | 1.58E-02 | 6.28E-01 | 1.05E-02 |
| <i>CG7896</i>    | FBgn0039728 | FBpp0084911   | Cobs_15906 | 0 | 6.31 | 6.61 | 6.35 | 5.86  | 8.70E-01 | 1.79E-02 | 1.09E-01 | 3.04E-04 | 1.48E-01 | 2.32E-02 |
| <i>CG14688</i>   | FBgn0037819 | FBpp0112127   | Cobs_15913 | 0 | 5.14 | 6.49 | 6.52 | 7.91  | 3.70E-02 | 6.39E-05 | 3.04E-02 | 1.74E-02 | 9.53E-01 | 3.89E-02 |
| <i>levy</i>      | FBgn0034877 | FBpp0071970   | Cobs_15933 | 1 | 4.92 | 4.63 | 5.01 | 5.81  | 7.70E-01 | 1.63E-03 | 3.74E-01 | 1.89E-04 | 1.78E-01 | 1.10E-02 |
| <i>NA</i>        | NA          | No hits found | Cobs_15946 | 0 | 6.30 | 6.69 | 6.41 | 5.46  | 7.97E-01 | 9.76E-03 | 2.32E-01 | 4.89E-04 | 3.65E-01 | 1.10E-02 |
| <i>Osi17</i>     | FBgn0037427 | FBpp0078259   | Cobs_16261 | 0 | 2.50 | 1.99 | 2.26 | 0.73  | 5.68E-01 | 8.66E-04 | 2.91E-01 | 1.52E-02 | 6.51E-01 | 1.00E-02 |
| <i>DhpD</i>      | FBgn0261436 | FBpp0078625   | Cobs_16313 | 1 | 4.37 | 4.68 | 4.70 | 5.64  | 2.39E-01 | 1.47E-05 | 2.46E-01 | 2.58E-04 | 9.55E-01 | 7.81E-04 |
| <i>Ir75c</i>     | FBgn0261401 | FBpp0291498   | Cobs_16365 | 1 | 4.41 | 4.45 | 4.41 | 3.67  | 9.48E-01 | 9.10E-03 | 9.92E-01 | 1.03E-02 | 9.31E-01 | 2.42E-02 |
| <i>twr</i>       | FBgn0262801 | FBpp0081185   | Cobs_16452 | 1 | 7.53 | 7.66 | 7.72 | 8.31  | 4.87E-01 | 1.91E-03 | 6.34E-01 | 9.23E-03 | 8.19E-01 | 3.41E-02 |
| <i>Sar1</i>      | FBgn0038947 | FBpp0089284   | Cobs_16472 | 1 | 7.56 | 7.81 | 7.71 | 8.29  | 5.31E-01 | 8.48E-04 | 2.51E-01 | 2.07E-02 | 6.67E-01 | 1.47E-02 |
| <i>Cad74A</i>    | FBgn0036715 | FBpp0075002   | Cobs_16530 | 1 | 6.33 | 5.42 | 5.85 | 4.94  | 2.24E-02 | 5.16E-07 | 4.59E-05 | 2.06E-02 | 2.92E-02 | 3.79E-04 |
| <i>Cad96Ca</i>   | FBgn0022800 | FBpp0084248   | Cobs_16558 | 0 | 4.94 | 4.06 | 4.31 | 3.60  | 4.07E-03 | 1.53E-06 | 1.30E-04 | 4.48E-02 | 2.46E-01 | 6.16E-03 |

|                 |             |               |            |   |      |      |      |       |          |          |          |          |          |          |
|-----------------|-------------|---------------|------------|---|------|------|------|-------|----------|----------|----------|----------|----------|----------|
| <i>CG2064</i>   | FBgn0033205 | FBpp0087997   | Cobs_16660 | 0 | 6.01 | 5.89 | 6.16 | 5.09  | 6.91E-01 | 5.18E-03 | 7.66E-01 | 1.46E-02 | 3.98E-01 | 4.64E-03 |
| <i>CG30421</i>  | FBgn0050421 | FBpp0072276   | Cobs_16706 | 1 | 6.07 | 5.98 | 5.99 | 5.60  | 6.68E-01 | 3.36E-03 | 6.30E-01 | 1.57E-02 | 9.81E-01 | 2.83E-02 |
| <i>mRpL32</i>   | FBgn0039835 | FBpp0085121   | Cobs_16736 | 1 | 4.60 | 4.55 | 4.73 | 5.52  | 6.38E-01 | 1.78E-04 | 8.83E-01 | 1.56E-04 | 4.62E-01 | 2.54E-03 |
| <i>CG10915</i>  | FBgn0034308 | FBpp0085925   | Cobs_16750 | 1 | 5.67 | 5.76 | 5.75 | 5.33  | 6.14E-01 | 1.39E-02 | 5.14E-01 | 2.55E-03 | 9.17E-01 | 8.28E-03 |
| <i>ade3</i>     | FBgn0000053 | FBpp0079059   | Cobs_16787 | 1 | 7.26 | 7.43 | 7.73 | 6.34  | 2.66E-01 | 1.44E-02 | 6.95E-01 | 4.92E-03 | 4.51E-01 | 2.26E-03 |
| <i>CG2059</i>   | FBgn0029942 | FBpp0292475   | Cobs_16814 | 1 | 5.94 | 5.99 | 6.03 | 6.68  | 7.17E-01 | 2.12E-04 | 8.32E-01 | 5.52E-04 | 8.70E-01 | 2.50E-03 |
| <i>CG9987</i>   | FBgn0032781 | FBpp0080746   | Cobs_16830 | 1 | 4.50 | 4.31 | 4.48 | 4.95  | 8.96E-01 | 1.31E-02 | 3.15E-01 | 1.11E-03 | 3.75E-01 | 1.85E-02 |
| <i>CG14515</i>  | FBgn0039648 | FBpp0084758   | Cobs_17048 | 1 | 3.93 | 5.09 | 3.24 | 0.39  | 1.25E-01 | 3.78E-05 | 7.86E-03 | 1.57E-06 | 1.02E-04 | 2.26E-03 |
| <i>CG17272</i>  | FBgn0038830 | FBpp0083396   | Cobs_17050 | 1 | 2.80 | 3.13 | 2.97 | 3.63  | 4.37E-01 | 4.71E-04 | 1.52E-01 | 2.61E-02 | 5.51E-01 | 1.08E-02 |
| <i>Mdh2</i>     | FBgn0262559 | FBpp0082985   | Cobs_17116 | 1 | 8.50 | 8.75 | 8.93 | 9.61  | 1.22E-01 | 7.76E-05 | 3.47E-01 | 1.35E-03 | 5.06E-01 | 1.76E-02 |
| <i>CG8773</i>   | FBgn0038135 | FBpp0288476   | Cobs_17184 | 0 | 8.32 | 8.34 | 8.34 | 10.17 | 9.83E-01 | 9.46E-03 | 9.82E-01 | 1.12E-02 | 1.00E+00 | 2.38E-02 |
| <i>NA</i>       | NA          | No hits found | Cobs_17222 | 0 | 6.53 | 5.89 | 6.48 | 7.64  | 9.55E-01 | 1.50E-02 | 1.88E-01 | 5.70E-04 | 1.94E-01 | 2.73E-02 |
| <i>Thiolase</i> | FBgn0025352 | FBpp0072135   | Cobs_17265 | 1 | 6.72 | 6.56 | 7.16 | 7.98  | 9.15E-02 | 1.61E-05 | 5.84E-01 | 6.52E-06 | 1.31E-02 | 4.64E-03 |
| <i>bgm</i>      | FBgn0027348 | FBpp0080167   | Cobs_17286 | 1 | 4.15 | 4.36 | 4.18 | 5.08  | 8.95E-01 | 4.07E-03 | 5.64E-01 | 2.52E-02 | 6.55E-01 | 1.50E-02 |
| <i>CG6084</i>   | FBgn0086254 | FBpp0075869   | Cobs_17301 | 0 | 7.30 | 7.68 | 7.41 | 8.88  | 8.74E-01 | 2.62E-03 | 5.09E-01 | 1.95E-02 | 6.28E-01 | 1.26E-02 |
| <i>NA</i>       | NA          | No hits found | Cobs_17305 | 0 | 5.75 | 5.93 | 5.76 | 6.83  | 9.66E-01 | 1.12E-03 | 5.98E-01 | 6.19E-03 | 6.09E-01 | 4.08E-03 |
| <i>-</i>        | <i>-</i>    | FBpp0074209   | Cobs_17422 | 1 | 7.38 | 7.00 | 7.05 | 6.57  | 3.56E-02 | 4.11E-06 | 8.65E-03 | 3.14E-03 | 7.15E-01 | 3.26E-03 |
| <i>drongo</i>   | FBgn0020304 | FBpp0291768   | Cobs_17436 | 1 | 6.34 | 6.46 | 6.38 | 6.04  | 8.17E-01 | 4.88E-02 | 4.67E-01 | 7.15E-03 | 6.44E-01 | 4.32E-02 |
| <i>CG10492</i>  | FBgn0032748 | FBpp0111956   | Cobs_17467 | 1 | 6.91 | 6.96 | 6.94 | 6.65  | 8.70E-01 | 3.73E-02 | 7.69E-01 | 1.59E-02 | 9.09E-01 | 4.14E-02 |
| <i>CG5703</i>   | FBgn0030853 | FBpp0074226   | Cobs_17499 | 1 | 5.69 | 5.86 | 5.74 | 6.46  | 8.52E-01 | 9.26E-04 | 4.63E-01 | 8.95E-03 | 5.96E-01 | 5.38E-03 |
| <i>pyd3</i>     | FBgn0037513 | FBpp0081276   | Cobs_17517 | 1 | 6.26 | 6.30 | 6.16 | 6.91  | 7.38E-01 | 1.17E-02 | 9.19E-01 | 1.78E-02 | 5.96E-01 | 1.05E-02 |
| <i>CG3192</i>   | FBgn0029888 | FBpp0099823   | Cobs_17625 | 1 | 5.04 | 5.15 | 5.39 | 5.84  | 8.77E-02 | 1.29E-04 | 6.30E-01 | 7.69E-04 | 1.93E-01 | 3.37E-02 |
| <i>CG5742</i>   | FBgn0034304 | FBpp0085959   | Cobs_17772 | 1 | 5.64 | 5.79 | 5.80 | 6.37  | 4.98E-01 | 1.08E-03 | 5.50E-01 | 7.31E-03 | 9.30E-01 | 1.93E-02 |
| <i>cype</i>     | FBgn0015031 | FBpp0297878   | Cobs_17813 | 1 | 6.54 | 6.86 | 7.01 | 7.93  | 8.56E-02 | 6.03E-06 | 2.22E-01 | 1.29E-04 | 5.65E-01 | 1.90E-03 |
| <i>CG9701</i>   | FBgn0036659 | FBpp0075080   | Cobs_17851 | 1 | 4.31 | 5.14 | 4.13 | 6.35  | 8.22E-01 | 1.06E-03 | 1.87E-01 | 3.49E-02 | 8.58E-02 | 1.68E-03 |
| <i>mor</i>      | FBgn0002783 | FBpp0291706   | Cobs_17981 | 1 | 6.76 | 6.70 | 6.64 | 6.35  | 3.40E-01 | 6.39E-04 | 6.52E-01 | 2.97E-03 | 6.03E-01 | 2.45E-02 |
| <i>rtet</i>     | FBgn0028468 | FBpp0083412   | Cobs_17983 | 1 | 4.58 | 4.69 | 4.72 | 5.12  | 4.98E-01 | 3.72E-03 | 5.74E-01 | 2.22E-02 | 9.08E-01 | 4.90E-02 |
| <i>Pcd</i>      | FBgn0024841 | FBpp0084824   | Cobs_18040 | 1 | 6.61 | 6.84 | 6.66 | 7.16  | 8.13E-01 | 9.19E-04 | 1.60E-01 | 4.25E-02 | 2.49E-01 | 6.16E-03 |
| <i>CG10219</i>  | FBgn0039112 | FBpp0083857   | Cobs_18047 | 1 | 6.11 | 5.88 | 6.29 | 7.04  | 4.38E-01 | 8.96E-05 | 3.30E-01 | 1.38E-05 | 4.94E-02 | 3.16E-03 |

|                  |             |             |            |   |      |      |      |      |          |          |          |          |          |          |
|------------------|-------------|-------------|------------|---|------|------|------|------|----------|----------|----------|----------|----------|----------|
| <i>Adk2</i>      | FBgn0022708 | FBpp0072072 | Cobs_18061 | 1 | 7.18 | 7.50 | 7.71 | 8.44 | 9.66E-02 | 1.04E-04 | 3.06E-01 | 2.24E-03 | 4.84E-01 | 2.91E-02 |
| <i>kibra</i>     | FBgn0262127 | FBpp0099467 | Cobs_18071 | 1 | 7.06 | 6.62 | 6.67 | 6.19 | 3.37E-02 | 1.61E-05 | 1.01E-02 | 1.21E-02 | 7.67E-01 | 1.21E-02 |
| <i>l(3)neo43</i> | FBgn0011476 | FBpp0290311 | Cobs_18112 | 1 | 2.75 | 3.00 | 3.26 | 3.97 | 1.93E-01 | 8.47E-04 | 5.74E-01 | 5.43E-03 | 4.62E-01 | 4.59E-02 |
| <i>sun</i>       | FBgn0014391 | FBpp0073963 | Cobs_18136 | 1 | 5.29 | 5.37 | 5.62 | 6.17 | 5.03E-02 | 6.03E-06 | 6.28E-01 | 3.05E-05 | 1.13E-01 | 3.13E-03 |
| <i>CG12256</i>   | FBgn0038002 | FBpp0082090 | Cobs_18180 | 0 | 5.79 | 6.10 | 6.10 | 6.91 | 1.92E-01 | 1.61E-05 | 1.75E-01 | 5.79E-04 | 9.92E-01 | 1.71E-03 |
| <i>CG6279</i>    | FBgn0036125 | FBpp0290579 | Cobs_18217 | 1 | 2.59 | 3.09 | 3.31 | 4.68 | 2.85E-01 | 3.16E-04 | 4.99E-01 | 2.41E-03 | 6.94E-01 | 1.10E-02 |
| <i>CG13996</i>   | FBgn0031763 | FBpp0078812 | Cobs_18247 | 0 | 5.03 | 4.86 | 4.68 | 4.07 | 9.08E-02 | 6.23E-05 | 3.86E-01 | 8.23E-04 | 3.86E-01 | 1.43E-02 |
| <i>lace</i>      | FBgn0002524 | FBpp0080297 | Cobs_18257 | 1 | 7.60 | 8.06 | 7.76 | 6.85 | 6.87E-01 | 2.47E-02 | 1.80E-01 | 7.74E-04 | 3.81E-01 | 1.71E-02 |



Supplementary Table S3: List of genes that are either significantly up- or downregulated in EM compared to all three other phenotypes. The binary flag Orthology is set to 1, if orthology was confirmed in reciprocal blasts. The columns EM, QU, WM, and WO give the mean expression as assessed by limma. The last six columns give FDR values for pairwise comparisons, also produced with limma.

| FB gene symbol        | FB gene ID  | FB protein ID | C.obs ID   | Orthol. | EM   | QU    | WM    | WO    | EM vs WM | EM vs WO | EM vs QU | QU vs WO | QU vs WM | WO vs WM |
|-----------------------|-------------|---------------|------------|---------|------|-------|-------|-------|----------|----------|----------|----------|----------|----------|
| <i>CG8924</i>         | FBgn0030710 | FBpp0073935   | Cobs_00087 | 1       | 7.36 | 6.90  | 6.95  | 6.76  | 2.33E-02 | 5.53E-04 | 6.08E-03 | 4.27E-01 | 7.68E-01 | 3.21E-01 |
| <i>mRpS17</i>         | FBgn0034986 | FBpp0072184   | Cobs_00156 | 1       | 6.60 | 6.97  | 7.04  | 7.00  | 1.32E-02 | 1.15E-02 | 2.39E-02 | 8.54E-01 | 6.67E-01 | 8.83E-01 |
| <i>DNApol-alpha73</i> | FBgn0005696 | FBpp0113035   | Cobs_00227 | 1       | 5.77 | 5.09  | 5.38  | 5.29  | 3.19E-02 | 5.38E-03 | 3.19E-04 | 2.96E-01 | 9.75E-02 | 7.17E-01 |
| <i>CG17019</i>        | FBgn0033783 | FBpp0086919   | Cobs_00230 | 1       | 5.01 | 5.65  | 5.81  | 5.64  | 6.73E-03 | 1.76E-02 | 1.94E-02 | 9.88E-01 | 5.58E-01 | 6.34E-01 |
| <i>CG7991</i>         | FBgn0035260 | FBpp0292222   | Cobs_00231 | 1       | 4.06 | 3.03  | 3.42  | 3.14  | 2.59E-02 | 1.48E-03 | 7.07E-04 | 7.91E-01 | 1.75E-01 | 4.02E-01 |
| <i>frac</i>           | FBgn0035798 | FBpp0288716   | Cobs_00333 | 1       | 3.21 | 1.48  | 1.64  | 1.79  | 2.63E-03 | 3.65E-03 | 1.09E-03 | 6.32E-01 | 8.23E-01 | 8.39E-01 |
| <i>Rps29</i>          | FBgn0261599 | FBpp0081614   | Cobs_00449 | 1       | 9.54 | 10.47 | 10.08 | 10.05 | 1.82E-03 | 9.71E-04 | 1.27E-06 | 5.98E-03 | 8.25E-03 | 9.20E-01 |
| <i>a</i>              | FBgn0000008 | FBpp0071677   | Cobs_00519 | 0       | 3.77 | 2.87  | 2.91  | 2.64  | 4.26E-03 | 4.37E-04 | 2.27E-03 | 5.64E-01 | 9.05E-01 | 5.30E-01 |
| <i>fend</i>           | FBgn0030090 | FBpp0071284   | Cobs_00566 | 0       | 6.52 | 4.84  | 5.84  | 4.94  | 3.30E-02 | 1.68E-05 | 6.87E-06 | 7.68E-01 | 1.68E-03 | 1.18E-02 |
| <i>Cyp49a1</i>        | FBgn0033524 | FBpp0293134   | Cobs_00812 | 0       | 6.48 | 7.22  | 7.01  | 7.09  | 2.32E-02 | 4.36E-03 | 1.04E-03 | 5.87E-01 | 3.25E-01 | 7.95E-01 |
| <i>Six4</i>           | FBgn0027364 | FBpp0077933   | Cobs_00814 | 1       | 2.77 | 1.24  | 2.22  | 1.42  | 4.54E-02 | 6.53E-05 | 1.49E-05 | 5.82E-01 | 1.89E-03 | 2.42E-02 |
| <i>CG1607</i>         | FBgn0039844 | FBpp0085147   | Cobs_00876 | 1       | 6.28 | 5.67  | 5.25  | 5.76  | 4.25E-04 | 3.32E-02 | 1.48E-02 | 7.52E-01 | 8.43E-02 | 6.66E-02 |
| <i>shg</i>            | FBgn0003391 | FBpp0071475   | Cobs_00906 | 1       | 7.25 | 6.61  | 6.90  | 6.90  | 2.62E-02 | 1.38E-02 | 6.75E-05 | 4.43E-02 | 3.90E-02 | 9.95E-01 |
| <i>Sply</i>           | FBgn0010591 | FBpp0086158   | Cobs_00908 | 1       | 6.54 | 7.43  | 7.56  | 7.73  | 5.36E-03 | 6.02E-04 | 7.64E-03 | 3.97E-01 | 7.31E-01 | 7.11E-01 |
| <i>Grasp65</i>        | FBgn0036919 | FBpp0074664   | Cobs_01009 | 1       | 7.15 | 7.55  | 7.56  | 7.74  | 4.64E-02 | 2.33E-03 | 3.92E-02 | 3.26E-01 | 9.47E-01 | 4.37E-01 |
| <i>CG8768</i>         | FBgn0033769 | FBpp0086984   | Cobs_01032 | 1       | 3.61 | 4.32  | 4.47  | 4.79  | 1.06E-03 | 1.63E-05 | 3.77E-03 | 3.21E-02 | 4.59E-01 | 2.14E-01 |
| <i>Fmo-1</i>          | FBgn0034943 | FBpp0072059   | Cobs_01037 | 0       | 3.57 | 2.32  | 2.01  | 2.38  | 6.39E-03 | 2.46E-02 | 1.32E-02 | 8.26E-01 | 6.88E-01 | 5.89E-01 |
| <i>CG13318</i>        | FBgn0037627 | FBpp0081424   | Cobs_01046 | 0       | 5.51 | 6.02  | 5.99  | 6.13  | 6.24E-03 | 2.85E-04 | 2.19E-03 | 5.19E-01 | 8.77E-01 | 4.70E-01 |
| <i>Ptp69D</i>         | FBgn0014007 | FBpp0075646   | Cobs_01109 | 1       | 7.42 | 7.06  | 6.83  | 7.00  | 2.17E-03 | 1.35E-02 | 3.78E-02 | 7.68E-01 | 1.55E-01 | 3.81E-01 |
| -                     | -           | FBpp0088224   | Cobs_01154 | 0       | 5.86 | 5.44  | 5.41  | 5.23  | 3.27E-02 | 2.03E-03 | 3.31E-02 | 3.31E-01 | 9.07E-01 | 4.67E-01 |
| <i>hh</i>             | FBgn0004644 | FBpp0099945   | Cobs_01209 | 1       | 2.71 | 1.67  | 1.81  | 1.63  | 5.60E-03 | 9.08E-04 | 1.47E-03 | 9.00E-01 | 6.87E-01 | 6.59E-01 |
| NA                    | NA          | No hits found | Cobs_01215 | 0       | 3.60 | 2.74  | 2.70  | 2.45  | 8.94E-03 | 1.65E-03 | 8.03E-03 | 5.81E-01 | 9.59E-01 | 6.79E-01 |
| <i>Sc2</i>            | FBgn0035471 | FBpp0073017   | Cobs_01216 | 0       | 2.59 | 1.88  | 1.78  | 1.69  | 3.11E-02 | 1.33E-02 | 4.11E-02 | 7.17E-01 | 8.63E-01 | 8.80E-01 |
| NA                    | NA          | No hits found | Cobs_01218 | 0       | 3.57 | 2.50  | 2.67  | 2.21  | 5.86E-03 | 2.32E-04 | 7.27E-04 | 6.66E-01 | 4.87E-01 | 3.08E-01 |

|                |             |               |            |   |      |      |      |      |          |          |          |          |          |          |
|----------------|-------------|---------------|------------|---|------|------|------|------|----------|----------|----------|----------|----------|----------|
| <i>jim</i>     | FBgn0027339 | FBpp0099541   | Cobs_01219 | 1 | 7.24 | 6.78 | 6.67 | 6.25 | 1.66E-02 | 6.28E-05 | 3.56E-02 | 1.71E-02 | 6.32E-01 | 9.43E-02 |
| <i>olf413</i>  | FBgn0037153 | FBpp0290707   | Cobs_01284 | 1 | 4.00 | 3.27 | 3.26 | 3.21 | 2.61E-02 | 1.04E-02 | 1.55E-02 | 9.21E-01 | 9.31E-01 | 8.82E-01 |
| <i>M6</i>      | FBgn0037092 | FBpp0078012   | Cobs_01343 | 1 | 6.50 | 6.02 | 6.05 | 6.03 | 3.11E-02 | 1.57E-02 | 1.43E-02 | 9.41E-01 | 8.94E-01 | 9.73E-01 |
| <i>CG9782</i>  | FBgn0030763 | FBpp0074063   | Cobs_01360 | 0 | 2.85 | 0.76 | 1.37 | 1.75 | 3.98E-03 | 1.44E-02 | 2.24E-04 | 8.27E-02 | 2.59E-01 | 6.00E-01 |
| <i>dsx</i>     | FBgn0000504 | FBpp0081256   | Cobs_01393 | 0 | 4.24 | 1.22 | 3.43 | 2.53 | 2.59E-02 | 8.96E-05 | 1.32E-06 | 1.64E-02 | 8.16E-05 | 4.84E-02 |
| <i>CG17807</i> | FBgn0034748 | FBpp0071849   | Cobs_01394 | 0 | 4.33 | 1.41 | 2.70 | 2.86 | 6.95E-04 | 8.69E-04 | 6.35E-06 | 1.34E-02 | 1.97E-02 | 8.45E-01 |
| <i>Cad87A</i>  | FBgn0037963 | FBpp0081987   | Cobs_01395 | 1 | 6.72 | 6.14 | 6.19 | 6.20 | 4.13E-03 | 2.04E-03 | 1.03E-03 | 7.91E-01 | 7.79E-01 | 9.96E-01 |
| <i>pug</i>     | FBgn0020385 | FBpp0081743   | Cobs_01505 | 1 | 8.05 | 8.47 | 8.56 | 8.63 | 2.10E-02 | 4.49E-03 | 3.73E-02 | 4.83E-01 | 6.84E-01 | 8.36E-01 |
| <i>CG14683</i> | FBgn0037822 | FBpp0081744   | Cobs_01510 | 1 | 6.46 | 7.21 | 7.16 | 7.02 | 3.99E-03 | 1.07E-02 | 1.24E-03 | 4.15E-01 | 8.69E-01 | 6.07E-01 |
| <i>Sans</i>    | FBgn0033785 | FBpp0086904   | Cobs_01542 | 0 | 5.56 | 5.04 | 4.96 | 4.45 | 8.44E-03 | 2.33E-05 | 1.30E-02 | 1.43E-02 | 7.54E-01 | 5.28E-02 |
| <i>ptc</i>     | FBgn0003892 | FBpp0088443   | Cobs_01594 | 1 | 6.57 | 5.59 | 5.74 | 5.31 | 1.88E-04 | 5.16E-07 | 8.24E-06 | 1.31E-01 | 4.28E-01 | 3.66E-02 |
| <i>Abd-B</i>   | FBgn0000015 | FBpp0089276   | Cobs_01831 | 1 | 4.59 | 3.63 | 3.99 | 3.92 | 3.21E-02 | 1.24E-02 | 8.16E-04 | 3.00E-01 | 1.67E-01 | 8.77E-01 |
| <i>abd-A</i>   | FBgn0000014 | FBpp0297433   | Cobs_01838 | 0 | 3.60 | 2.86 | 2.72 | 2.71 | 2.92E-03 | 1.59E-03 | 6.39E-03 | 6.60E-01 | 6.70E-01 | 9.71E-01 |
| <i>Dfd</i>     | FBgn0000439 | FBpp0081138   | Cobs_01871 | 1 | 2.79 | 2.19 | 2.05 | 2.09 | 1.16E-02 | 1.57E-02 | 3.34E-02 | 8.31E-01 | 6.12E-01 | 8.70E-01 |
| <i>CG12075</i> | FBgn0030065 | FBpp0298272   | Cobs_02135 | 1 | 4.57 | 3.83 | 3.73 | 3.32 | 1.08E-03 | 1.51E-05 | 1.79E-03 | 4.11E-02 | 7.00E-01 | 1.36E-01 |
| <i>CG9531</i>  | FBgn0031817 | FBpp0078900   | Cobs_02136 | 1 | 3.90 | 5.70 | 5.34 | 5.07 | 1.74E-03 | 3.74E-03 | 5.62E-05 | 1.12E-01 | 3.29E-01 | 6.26E-01 |
| <i>ec</i>      | FBgn0000542 | FBpp0100019   | Cobs_02181 | 1 | 7.70 | 6.89 | 7.22 | 6.87 | 2.94E-02 | 1.60E-04 | 2.14E-04 | 9.58E-01 | 8.73E-02 | 1.23E-01 |
| <i>CG32549</i> | FBgn0052549 | FBpp0074343   | Cobs_02193 | 1 | 6.11 | 6.62 | 6.70 | 7.30 | 1.86E-02 | 1.51E-05 | 2.82E-02 | 3.54E-03 | 7.42E-01 | 1.90E-02 |
| <i>Ser</i>     | FBgn0004197 | FBpp0084498   | Cobs_02195 | 1 | 5.67 | 4.85 | 4.92 | 4.57 | 3.49E-03 | 4.82E-05 | 8.36E-04 | 2.93E-01 | 7.51E-01 | 2.03E-01 |
| <i>Chi</i>     | FBgn0013764 | FBpp0072100   | Cobs_02277 | 1 | 5.11 | 4.47 | 4.61 | 4.44 | 3.70E-02 | 5.35E-03 | 7.90E-03 | 9.38E-01 | 6.26E-01 | 6.46E-01 |
| <i>NA</i>      | NA          | No hits found | Cobs_02281 | 0 | 3.75 | 2.82 | 2.88 | 2.89 | 2.34E-02 | 1.59E-02 | 9.51E-03 | 8.41E-01 | 8.04E-01 | 9.93E-01 |
| <i>CG5639</i>  | FBgn0039527 | FBpp0084572   | Cobs_02373 | 1 | 4.42 | 3.08 | 3.88 | 3.09 | 3.10E-02 | 1.88E-05 | 1.49E-05 | 9.71E-01 | 3.16E-03 | 1.10E-02 |
| <i>NA</i>      | NA          | No hits found | Cobs_02517 | 0 | 3.27 | 3.85 | 3.95 | 3.98 | 2.30E-02 | 1.12E-02 | 3.94E-02 | 6.95E-01 | 7.41E-01 | 9.51E-01 |
| <i>plexA</i>   | FBgn0025741 | FBpp0088287   | Cobs_02546 | 0 | 7.39 | 6.80 | 6.88 | 6.87 | 6.60E-03 | 2.26E-03 | 8.84E-04 | 7.23E-01 | 6.22E-01 | 9.46E-01 |
| -              | -           | FBpp0099691   | Cobs_02550 | 1 | 6.87 | 6.43 | 6.30 | 6.42 | 1.41E-02 | 3.26E-02 | 4.03E-02 | 9.77E-01 | 5.49E-01 | 6.65E-01 |
| <i>mab-21</i>  | FBgn0029003 | FBpp0070855   | Cobs_02640 | 0 | 4.45 | 4.05 | 3.86 | 3.80 | 3.21E-03 | 8.66E-04 | 2.94E-02 | 1.98E-01 | 2.95E-01 | 8.35E-01 |
| <i>Ent3</i>    | FBgn0036319 | FBpp0075667   | Cobs_02741 | 1 | 3.78 | 4.45 | 4.71 | 4.57 | 9.13E-04 | 1.76E-03 | 8.36E-03 | 6.34E-01 | 2.52E-01 | 6.69E-01 |
| <i>Tollo</i>   | FBgn0029114 | FBpp0075360   | Cobs_02783 | 0 | 4.74 | 3.11 | 4.00 | 3.44 | 1.86E-02 | 1.85E-04 | 1.68E-05 | 3.47E-01 | 6.88E-03 | 1.36E-01 |
| <i>Toll-6</i>  | FBgn0036494 | FBpp0297411   | Cobs_02797 | 1 | 5.84 | 5.35 | 5.03 | 5.35 | 2.91E-03 | 4.34E-02 | 4.01E-02 | 9.59E-01 | 1.98E-01 | 2.48E-01 |

|                |             |               |            |   |       |       |       |       |          |          |          |          |          |          |
|----------------|-------------|---------------|------------|---|-------|-------|-------|-------|----------|----------|----------|----------|----------|----------|
| NA             | NA          | No hits found | Cobs_02938 | 0 | 2.59  | 1.74  | 1.61  | 1.56  | 2.32E-02 | 1.27E-02 | 3.58E-02 | 7.50E-01 | 8.08E-01 | 9.41E-01 |
| <i>heph</i>    | FBgn0011224 | FBpp0289493   | Cobs_03077 | 1 | 5.34  | 4.22  | 4.63  | 4.73  | 5.67E-03 | 8.91E-03 | 3.59E-05 | 3.69E-02 | 7.32E-02 | 7.97E-01 |
| <i>heph</i>    | FBgn0011224 | FBpp0297631   | Cobs_03079 | 0 | 3.46  | 2.33  | 2.51  | 2.52  | 1.91E-03 | 1.76E-03 | 2.40E-04 | 4.80E-01 | 5.26E-01 | 9.34E-01 |
| <i>heph</i>    | FBgn0011224 | FBpp0111778   | Cobs_03080 | 0 | 4.28  | 3.53  | 3.60  | 3.78  | 2.12E-03 | 1.29E-02 | 3.97E-04 | 1.93E-01 | 6.79E-01 | 4.45E-01 |
| <i>ex</i>      | FBgn0004583 | FBpp0077719   | Cobs_03123 | 0 | 6.58  | 5.65  | 6.03  | 5.43  | 2.40E-02 | 2.09E-05 | 1.64E-04 | 4.14E-01 | 7.88E-02 | 2.28E-02 |
| -              | -           | FBpp0085079   | Cobs_03140 | 1 | 6.05  | 5.42  | 5.36  | 5.06  | 3.05E-03 | 4.08E-05 | 3.41E-03 | 9.70E-02 | 8.08E-01 | 2.20E-01 |
| <i>sti</i>     | FBgn0002466 | FBpp0075702   | Cobs_03145 | 0 | 6.26  | 7.20  | 6.71  | 7.46  | 3.15E-02 | 1.18E-06 | 2.11E-05 | 1.80E-01 | 8.61E-03 | 9.33E-04 |
| <i>Wnt2</i>    | FBgn0004360 | FBpp0087596   | Cobs_03196 | 1 | 3.96  | 2.90  | 2.96  | 2.81  | 1.88E-03 | 3.13E-04 | 8.42E-04 | 7.69E-01 | 8.92E-01 | 7.11E-01 |
| <i>gbb</i>     | FBgn0024234 | FBpp0072036   | Cobs_03282 | 1 | 4.25  | 3.74  | 3.65  | 3.03  | 1.11E-02 | 2.37E-05 | 2.60E-02 | 6.99E-03 | 6.62E-01 | 3.45E-02 |
| <i>stai</i>    | FBgn0266521 | FBpp0078829   | Cobs_03331 | 1 | 6.60  | 5.83  | 5.75  | 5.81  | 8.20E-05 | 4.88E-05 | 5.38E-05 | 9.47E-01 | 6.94E-01 | 8.27E-01 |
| <i>CG4552</i>  | FBgn0031304 | FBpp0077621   | Cobs_03349 | 1 | 5.38  | 5.96  | 6.07  | 6.07  | 2.22E-02 | 1.32E-02 | 4.06E-02 | 7.35E-01 | 6.91E-01 | 9.87E-01 |
| <i>Amun</i>    | FBgn0030328 | FBpp0292402   | Cobs_03365 | 1 | 6.93  | 6.20  | 6.44  | 6.39  | 4.52E-03 | 8.94E-04 | 3.45E-05 | 2.39E-01 | 1.10E-01 | 8.22E-01 |
| NA             | NA          | No hits found | Cobs_03444 | 0 | 4.47  | 5.22  | 5.34  | 5.53  | 1.39E-02 | 1.75E-03 | 2.62E-02 | 3.48E-01 | 6.83E-01 | 6.83E-01 |
| <i>Sema-2a</i> | FBgn0011260 | FBpp0086236   | Cobs_03455 | 0 | 4.35  | 3.73  | 3.65  | 3.72  | 5.04E-03 | 7.09E-03 | 7.30E-03 | 9.84E-01 | 8.05E-01 | 8.45E-01 |
| <i>CG33985</i> | FBgn0053985 | FBpp0099397   | Cobs_03527 | 0 | 11.08 | 12.53 | 12.56 | 12.90 | 4.91E-02 | 8.70E-03 | 3.92E-02 | 6.33E-01 | 9.64E-01 | 7.38E-01 |
| <i>pip</i>     | FBgn0003089 | FBpp0074770   | Cobs_03713 | 1 | 2.28  | 1.16  | 1.40  | 1.31  | 4.00E-02 | 2.43E-02 | 1.22E-02 | 7.89E-01 | 6.71E-01 | 9.39E-01 |
| <i>arr</i>     | FBgn0000119 | FBpp0086821   | Cobs_03771 | 0 | 5.86  | 5.31  | 5.33  | 5.32  | 3.99E-03 | 1.99E-03 | 1.61E-03 | 9.25E-01 | 9.06E-01 | 9.93E-01 |
| <i>vari</i>    | FBgn0250785 | FBpp0088884   | Cobs_03790 | 1 | 5.29  | 4.79  | 4.58  | 4.47  | 3.09E-04 | 2.65E-05 | 3.67E-03 | 5.66E-02 | 2.13E-01 | 5.81E-01 |
| NA             | NA          | No hits found | Cobs_03838 | 0 | 4.05  | 2.60  | 3.33  | 3.16  | 3.95E-02 | 9.46E-03 | 1.67E-04 | 1.15E-01 | 3.06E-02 | 7.36E-01 |
| <i>CG10631</i> | FBgn0032817 | FBpp0080856   | Cobs_03841 | 0 | 4.09  | 4.70  | 4.70  | 4.71  | 2.99E-03 | 1.49E-03 | 1.33E-03 | 9.49E-01 | 9.43E-01 | 9.99E-01 |
| <i>CG8927</i>  | FBgn0038405 | FBpp0082708   | Cobs_03941 | 1 | 4.36  | 2.55  | 3.36  | 3.29  | 3.49E-03 | 1.28E-03 | 1.39E-05 | 4.93E-02 | 2.20E-02 | 8.85E-01 |
| -              | -           | FBpp0073941   | Cobs_04008 | 0 | 5.30  | 5.01  | 4.97  | 4.70  | 3.63E-02 | 2.49E-04 | 4.73E-02 | 4.96E-02 | 8.36E-01 | 1.19E-01 |
| <i>CG4729</i>  | FBgn0036623 | FBpp0075177   | Cobs_04082 | 1 | 7.23  | 7.92  | 7.92  | 7.85  | 3.73E-03 | 3.55E-03 | 1.97E-03 | 8.17E-01 | 9.86E-01 | 8.44E-01 |
| <i>dac</i>     | FBgn0005677 | FBpp0099814   | Cobs_04141 | 1 | 3.68  | 2.45  | 2.49  | 2.58  | 5.19E-03 | 9.46E-03 | 3.16E-03 | 7.00E-01 | 9.29E-01 | 8.15E-01 |
| <i>CG8909</i>  | FBgn0030706 | FBpp0290880   | Cobs_04252 | 0 | 8.98  | 8.47  | 8.32  | 7.65  | 3.95E-03 | 6.68E-07 | 1.41E-02 | 2.29E-04 | 4.79E-01 | 4.51E-03 |
| <i>CG15347</i> | FBgn0030040 | FBpp0071185   | Cobs_04264 | 0 | 5.50  | 4.53  | 5.00  | 4.39  | 2.16E-02 | 1.53E-05 | 3.92E-05 | 5.83E-01 | 2.34E-02 | 1.36E-02 |
| <i>CG4365</i>  | FBgn0037024 | FBpp0077911   | Cobs_04269 | 1 | 5.86  | 6.57  | 6.66  | 6.55  | 3.56E-03 | 5.24E-03 | 4.96E-03 | 9.53E-01 | 7.39E-01 | 7.59E-01 |
| <i>CG12484</i> | FBgn0086604 | FBpp0111686   | Cobs_04378 | 1 | 1.96  | 0.90  | 0.96  | 0.79  | 2.62E-02 | 1.00E-02 | 1.49E-02 | 9.26E-01 | 8.97E-01 | 8.59E-01 |
| <i>grh</i>     | FBgn0259211 | FBpp0289766   | Cobs_04479 | 0 | 4.01  | 3.29  | 3.39  | 3.00  | 1.33E-02 | 2.83E-04 | 3.59E-03 | 3.72E-01 | 7.16E-01 | 2.40E-01 |

|                |             |               |            |   |      |      |      |      |          |          |          |          |          |          |
|----------------|-------------|---------------|------------|---|------|------|------|------|----------|----------|----------|----------|----------|----------|
| <i>grh</i>     | FBgn0259211 | FBpp0297580   | Cobs_04483 | 1 | 6.44 | 5.84 | 5.85 | 5.75 | 5.88E-03 | 8.66E-04 | 3.11E-03 | 6.99E-01 | 9.74E-01 | 7.31E-01 |
| <i>Sp1</i>     | FBgn0020378 | FBpp0271862   | Cobs_04627 | 1 | 4.57 | 3.05 | 3.58 | 3.68 | 3.45E-03 | 7.15E-03 | 6.79E-05 | 7.17E-02 | 1.51E-01 | 7.48E-01 |
| <i>CG3770</i>  | FBgn0035085 | FBpp0072300   | Cobs_04643 | 1 | 4.78 | 4.15 | 4.36 | 4.12 | 4.23E-02 | 1.12E-03 | 2.48E-03 | 8.29E-01 | 3.08E-01 | 2.68E-01 |
| <i>Sdc</i>     | FBgn0010415 | FBpp0297065   | Cobs_04797 | 1 | 7.64 | 7.09 | 7.15 | 7.15 | 2.37E-02 | 1.24E-02 | 6.16E-03 | 7.87E-01 | 7.67E-01 | 9.98E-01 |
| <i>CG34355</i> | FBgn0085384 | FBpp0271723   | Cobs_04887 | 1 | 3.68 | 4.54 | 4.59 | 4.16 | 8.20E-05 | 8.92E-03 | 4.59E-05 | 5.23E-02 | 7.80E-01 | 4.16E-02 |
| <i>NA</i>      | NA          | No hits found | Cobs_05006 | 0 | 2.74 | 1.75 | 1.98 | 1.95 | 1.12E-02 | 6.01E-03 | 8.87E-04 | 4.88E-01 | 3.80E-01 | 9.48E-01 |
| -              | -           | FBpp0111518   | Cobs_05014 | 0 | 6.05 | 5.63 | 5.70 | 5.53 | 2.62E-02 | 7.80E-04 | 5.03E-03 | 5.47E-01 | 6.49E-01 | 3.32E-01 |
| <i>S</i>       | FBgn0003310 | FBpp0077659   | Cobs_05252 | 1 | 4.18 | 3.23 | 3.59 | 3.48 | 4.89E-03 | 8.97E-04 | 3.69E-05 | 2.56E-01 | 7.68E-02 | 7.18E-01 |
| <i>Rac1</i>    | FBgn0010333 | FBpp0072614   | Cobs_05262 | 1 | 6.58 | 6.92 | 6.90 | 6.93 | 3.15E-02 | 9.84E-03 | 1.35E-02 | 9.62E-01 | 8.87E-01 | 8.83E-01 |
| -              | -           | FBpp0088147   | Cobs_05687 | 1 | 3.54 | 2.77 | 2.96 | 2.69 | 3.36E-02 | 1.86E-03 | 4.51E-03 | 8.11E-01 | 4.68E-01 | 3.83E-01 |
| -              | -           | FBpp0088147   | Cobs_05689 | 0 | 1.63 | 0.65 | 0.66 | 0.81 | 1.43E-02 | 3.21E-02 | 8.48E-03 | 6.23E-01 | 9.37E-01 | 7.40E-01 |
| <i>nvd</i>     | FBgn0259697 | FBpp0112384   | Cobs_05891 | 1 | 4.35 | 2.74 | 2.47 | 1.37 | 3.99E-03 | 2.24E-04 | 7.90E-03 | 9.32E-02 | 7.11E-01 | 2.40E-01 |
| <i>NA</i>      | NA          | No hits found | Cobs_05909 | 0 | 5.70 | 7.03 | 6.28 | 7.08 | 3.97E-02 | 1.37E-05 | 1.49E-05 | 8.80E-01 | 3.96E-03 | 7.69E-03 |
| <i>Mon1</i>    | FBgn0031640 | FBpp0077079   | Cobs_05949 | 1 | 4.93 | 5.37 | 5.51 | 5.47 | 2.63E-03 | 2.19E-03 | 1.24E-02 | 5.91E-01 | 4.06E-01 | 8.80E-01 |
| <i>Tmhs</i>    | FBgn0262624 | FBpp0072717   | Cobs_05950 | 1 | 4.65 | 4.11 | 4.01 | 3.56 | 1.88E-03 | 5.49E-06 | 4.34E-03 | 7.00E-03 | 6.08E-01 | 4.14E-02 |
| <i>ci</i>      | FBgn0004859 | FBpp0297298   | Cobs_06006 | 1 | 7.07 | 5.83 | 6.49 | 5.73 | 6.79E-03 | 5.80E-07 | 1.16E-06 | 7.12E-01 | 1.24E-03 | 1.62E-03 |
| <i>CG10189</i> | FBgn0032793 | FBpp0080822   | Cobs_06036 | 0 | 5.61 | 5.13 | 4.95 | 5.05 | 1.25E-03 | 2.59E-03 | 8.04E-03 | 7.52E-01 | 3.30E-01 | 6.61E-01 |
| <i>Eip74EF</i> | FBgn0000567 | FBpp0099825   | Cobs_06037 | 1 | 4.63 | 3.93 | 3.80 | 3.88 | 7.30E-03 | 7.64E-03 | 1.05E-02 | 9.47E-01 | 7.96E-01 | 9.03E-01 |
| <i>usp</i>     | FBgn0003964 | FBpp0070332   | Cobs_06519 | 1 | 5.25 | 4.69 | 4.71 | 4.56 | 1.37E-02 | 1.12E-03 | 5.40E-03 | 6.18E-01 | 8.65E-01 | 5.51E-01 |
| <i>CG30105</i> | FBgn0050105 | FBpp0086057   | Cobs_06552 | 1 | 2.53 | 1.74 | 1.92 | 1.91 | 2.84E-02 | 1.77E-02 | 3.68E-03 | 5.59E-01 | 4.76E-01 | 9.69E-01 |
| <i>CG6613</i>  | FBgn0034694 | FBpp0071672   | Cobs_06567 | 1 | 6.74 | 7.34 | 7.33 | 7.19 | 8.97E-04 | 3.37E-03 | 2.54E-04 | 3.37E-01 | 9.42E-01 | 4.54E-01 |
| <i>CG34383</i> | FBgn0085412 | FBpp0288450   | Cobs_06593 | 1 | 7.14 | 6.63 | 6.79 | 6.75 | 4.80E-02 | 1.57E-02 | 2.73E-03 | 5.04E-01 | 3.30E-01 | 8.75E-01 |
| <i>CG8237</i>  | FBgn0033350 | FBpp0087734   | Cobs_06623 | 1 | 4.69 | 5.31 | 5.35 | 5.73 | 3.49E-02 | 5.70E-04 | 3.39E-02 | 1.34E-01 | 9.21E-01 | 2.21E-01 |
| <i>CG11986</i> | FBgn0037656 | FBpp0081447   | Cobs_06702 | 1 | 4.94 | 5.79 | 5.60 | 5.66 | 3.50E-02 | 1.27E-02 | 4.09E-03 | 6.69E-01 | 4.95E-01 | 8.95E-01 |
| <i>CG5065</i>  | FBgn0034145 | FBpp0297360   | Cobs_06846 | 0 | 4.90 | 3.78 | 3.81 | 3.45 | 2.14E-02 | 1.80E-03 | 1.35E-02 | 4.89E-01 | 9.48E-01 | 4.97E-01 |
| <i>NA</i>      | NA          | No hits found | Cobs_06857 | 0 | 8.06 | 7.49 | 7.52 | 7.55 | 4.32E-02 | 3.81E-02 | 2.38E-02 | 8.45E-01 | 9.45E-01 | 9.25E-01 |
| <i>twi</i>     | FBgn0003900 | FBpp0099476   | Cobs_06866 | 1 | 2.15 | 0.79 | 1.12 | 0.56 | 2.05E-03 | 3.51E-05 | 1.34E-04 | 5.98E-01 | 3.63E-01 | 1.82E-01 |
| <i>Msp-300</i> | FBgn0261836 | FBpp0292446   | Cobs_06868 | 0 | 5.07 | 4.52 | 4.66 | 4.61 | 1.78E-02 | 4.62E-03 | 1.14E-03 | 6.14E-01 | 3.67E-01 | 8.29E-01 |
| <i>CG14711</i> | FBgn0037922 | FBpp0081892   | Cobs_06907 | 0 | 2.84 | 2.20 | 2.03 | 2.22 | 1.35E-02 | 4.49E-02 | 3.65E-02 | 9.32E-01 | 6.26E-01 | 6.38E-01 |

|                  |             |               |            |   |      |      |      |       |          |          |          |          |          |          |
|------------------|-------------|---------------|------------|---|------|------|------|-------|----------|----------|----------|----------|----------|----------|
| <i>RhoGAP68F</i> | FBgn0036257 | FBpp0075729   | Cobs_06910 | 0 | 6.84 | 6.25 | 6.15 | 5.95  | 6.22E-04 | 1.60E-05 | 1.20E-03 | 7.44E-02 | 5.72E-01 | 3.10E-01 |
| <i>CG4751</i>    | FBgn0032348 | FBpp0079789   | Cobs_06940 | 1 | 4.96 | 4.62 | 4.51 | 4.50  | 8.88E-03 | 5.05E-03 | 3.49E-02 | 5.18E-01 | 4.95E-01 | 9.93E-01 |
| <i>CG15093</i>   | FBgn0034390 | FBpp0292854   | Cobs_06958 | 1 | 5.04 | 6.15 | 6.26 | 6.41  | 1.22E-02 | 2.22E-03 | 1.32E-02 | 5.72E-01 | 8.28E-01 | 7.97E-01 |
| <i>Wnt2</i>      | FBgn0004360 | FBpp0087596   | Cobs_07267 | 0 | 3.21 | 2.44 | 2.45 | 2.20  | 2.30E-02 | 5.91E-03 | 1.43E-02 | 7.72E-01 | 9.33E-01 | 7.51E-01 |
| <i>lqfR</i>      | FBgn0261279 | FBpp0288789   | Cobs_07298 | 1 | 7.36 | 7.73 | 7.77 | 7.73  | 3.65E-02 | 3.50E-02 | 3.95E-02 | 9.97E-01 | 8.62E-01 | 8.99E-01 |
| <i>lbe</i>       | FBgn0011278 | FBpp0083490   | Cobs_07397 | 0 | 3.16 | 1.59 | 1.93 | 1.78  | 1.10E-03 | 2.24E-04 | 5.08E-05 | 6.31E-01 | 3.06E-01 | 7.49E-01 |
| <i>lbe</i>       | FBgn0011278 | FBpp0083490   | Cobs_07399 | 1 | 2.02 | 0.60 | 0.35 | 0.05  | 2.75E-03 | 4.49E-04 | 5.99E-03 | 3.90E-01 | 6.60E-01 | 7.49E-01 |
| <i>CG16786</i>   | FBgn0034974 | FBpp0072156   | Cobs_07495 | 1 | 6.58 | 5.76 | 5.79 | 6.00  | 3.00E-03 | 1.24E-02 | 1.07E-03 | 3.49E-01 | 9.03E-01 | 4.97E-01 |
| -                | -           | FBpp0290768   | Cobs_07565 | 1 | 5.20 | 4.49 | 4.34 | 4.36  | 1.88E-03 | 1.25E-03 | 5.99E-03 | 6.27E-01 | 5.21E-01 | 9.49E-01 |
| <i>unc-5</i>     | FBgn0034013 | FBpp0086514   | Cobs_07859 | 1 | 5.66 | 4.68 | 4.78 | 4.65  | 5.79E-04 | 6.93E-05 | 7.29E-05 | 9.63E-01 | 6.92E-01 | 7.32E-01 |
| <i>crok</i>      | FBgn0032421 | FBpp0079924   | Cobs_07876 | 1 | 4.00 | 3.62 | 3.60 | 3.52  | 2.03E-02 | 2.99E-03 | 1.95E-02 | 5.47E-01 | 9.36E-01 | 6.68E-01 |
| <i>neo</i>       | FBgn0039704 | FBpp0084852   | Cobs_07992 | 0 | 2.55 | 1.06 | 1.34 | 1.45  | 1.88E-03 | 2.73E-03 | 1.71E-04 | 3.03E-01 | 4.52E-01 | 8.18E-01 |
| <i>Mpc1</i>      | FBgn0038662 | FBpp0083137   | Cobs_08166 | 0 | 4.43 | 4.77 | 4.79 | 5.09  | 3.31E-02 | 9.94E-05 | 3.56E-02 | 2.99E-02 | 9.00E-01 | 6.66E-02 |
| <i>N</i>         | FBgn0004647 | FBpp0293201   | Cobs_08219 | 0 | 3.17 | 2.16 | 2.36 | 2.25  | 9.85E-03 | 4.28E-03 | 1.60E-03 | 7.38E-01 | 5.51E-01 | 8.95E-01 |
| <i>N</i>         | FBgn0004647 | FBpp0293201   | Cobs_08231 | 1 | 7.51 | 6.35 | 6.84 | 6.40  | 2.37E-03 | 3.84E-06 | 1.86E-06 | 8.43E-01 | 9.43E-03 | 3.85E-02 |
| <i>N</i>         | FBgn0004647 | FBpp0293201   | Cobs_08234 | 0 | 3.78 | 2.62 | 3.03 | 2.53  | 8.59E-03 | 1.02E-04 | 1.47E-04 | 8.94E-01 | 1.32E-01 | 1.50E-01 |
| <i>fz4</i>       | FBgn0027342 | FBpp0070977   | Cobs_08295 | 1 | 4.79 | 3.45 | 4.05 | 3.77  | 3.49E-03 | 1.29E-04 | 6.87E-06 | 2.12E-01 | 1.46E-02 | 3.61E-01 |
| -                | -           | FBpp0071866   | Cobs_08305 | 1 | 5.56 | 6.48 | 6.49 | 6.21  | 3.88E-03 | 2.41E-02 | 2.17E-03 | 3.56E-01 | 9.87E-01 | 4.08E-01 |
| <i>Inx3</i>      | FBgn0265274 | FBpp0084719   | Cobs_08347 | 1 | 5.60 | 4.43 | 4.92 | 4.42  | 9.42E-03 | 4.05E-05 | 3.69E-05 | 9.82E-01 | 4.94E-02 | 8.50E-02 |
| <i>NA</i>        | NA          | No hits found | Cobs_08348 | 0 | 4.18 | 3.40 | 3.21 | 3.36  | 3.51E-03 | 5.48E-03 | 1.23E-02 | 8.35E-01 | 5.51E-01 | 8.14E-01 |
| <i>stan</i>      | FBgn0024836 | FBpp0293439   | Cobs_08349 | 1 | 8.79 | 7.82 | 8.09 | 7.96  | 1.03E-03 | 4.82E-05 | 8.20E-06 | 4.81E-01 | 1.20E-01 | 5.54E-01 |
| <i>nompC</i>     | FBgn0016920 | FBpp0293383   | Cobs_08540 | 1 | 3.45 | 2.90 | 2.90 | 2.86  | 4.68E-02 | 3.87E-02 | 4.33E-02 | 9.86E-01 | 9.84E-01 | 9.99E-01 |
| <i>ed</i>        | FBgn0000547 | FBpp0077154   | Cobs_08564 | 0 | 7.33 | 6.00 | 6.45 | 6.30  | 2.36E-04 | 1.61E-05 | 7.70E-07 | 1.53E-01 | 2.32E-02 | 5.48E-01 |
| <i>Fer1HCH</i>   | FBgn0015222 | FBpp0084998   | Cobs_08636 | 1 | 9.04 | 9.91 | 9.96 | 10.26 | 2.62E-02 | 1.77E-03 | 2.33E-02 | 3.85E-01 | 9.05E-01 | 5.47E-01 |
| <i>Vha44</i>     | FBgn0262511 | FBpp0086320   | Cobs_08642 | 1 | 7.14 | 7.62 | 7.54 | 7.66  | 4.17E-02 | 4.29E-03 | 1.02E-02 | 8.33E-01 | 7.10E-01 | 6.16E-01 |
| <i>Fs</i>        | FBgn0259878 | FBpp0089409   | Cobs_08664 | 1 | 3.69 | 2.53 | 2.47 | 2.39  | 6.90E-04 | 2.36E-04 | 6.58E-04 | 7.47E-01 | 8.96E-01 | 8.81E-01 |
| <i>Hdc</i>       | FBgn0005619 | FBpp0087422   | Cobs_08684 | 0 | 2.67 | 1.77 | 1.43 | 2.15  | 2.06E-04 | 4.74E-02 | 1.36E-03 | 1.70E-01 | 3.18E-01 | 3.10E-02 |
| <i>CG31547</i>   | FBgn0051547 | FBpp0078412   | Cobs_08689 | 1 | 5.25 | 3.73 | 4.30 | 4.27  | 2.80E-02 | 2.83E-02 | 1.24E-03 | 2.15E-01 | 2.38E-01 | 9.28E-01 |
| <i>tio</i>       | FBgn0028979 | FBpp0088404   | Cobs_08782 | 1 | 6.29 | 5.64 | 5.38 | 5.28  | 6.74E-04 | 9.45E-05 | 5.81E-03 | 1.36E-01 | 2.57E-01 | 7.84E-01 |

|                   |             |               |            |   |      |      |      |      |          |          |          |          |          |          |
|-------------------|-------------|---------------|------------|---|------|------|------|------|----------|----------|----------|----------|----------|----------|
| <i>wg</i>         | FBgn0004009 | FBpp0079060   | Cobs_08854 | 1 | 2.46 | 1.39 | 1.52 | 1.57 | 2.14E-02 | 1.87E-02 | 7.68E-03 | 7.28E-01 | 7.62E-01 | 9.59E-01 |
| <i>Wnt6</i>       | FBgn0031902 | FBpp0292343   | Cobs_08860 | 1 | 1.73 | 0.27 | 0.66 | 0.11 | 2.99E-02 | 1.80E-03 | 4.83E-03 | 8.18E-01 | 5.25E-01 | 4.29E-01 |
| <i>Wnt10</i>      | FBgn0031903 | FBpp0292305   | Cobs_08872 | 1 | 2.89 | 1.30 | 1.81 | 1.50 | 2.96E-03 | 2.56E-04 | 9.49E-05 | 7.28E-01 | 2.06E-01 | 5.10E-01 |
| <i>NA</i>         | NA          | No hits found | Cobs_08973 | 0 | 3.37 | 2.41 | 2.78 | 2.65 | 3.72E-02 | 1.20E-02 | 1.47E-03 | 4.39E-01 | 2.10E-01 | 8.02E-01 |
| <i>gsb-n</i>      | FBgn0001147 | FBpp0072363   | Cobs_09004 | 1 | 2.15 | 0.32 | 0.73 | 0.62 | 2.02E-04 | 6.38E-05 | 1.47E-05 | 5.36E-01 | 3.59E-01 | 8.87E-01 |
| <i>CG34133</i>    | FBgn0083969 | FBpp0110188   | Cobs_09012 | 1 | 6.63 | 7.04 | 7.20 | 7.12 | 4.14E-05 | 4.82E-05 | 3.11E-04 | 5.23E-01 | 1.40E-01 | 5.60E-01 |
| <i>CG6426</i>     | FBgn0034162 | FBpp0086191   | Cobs_09041 | 1 | 7.06 | 6.48 | 6.57 | 6.40 | 1.36E-02 | 6.33E-04 | 2.14E-03 | 7.25E-01 | 6.49E-01 | 4.66E-01 |
| <i>l(3)72Dp</i>   | FBgn0263607 | FBpp0075214   | Cobs_09055 | 1 | 4.42 | 5.85 | 5.70 | 5.64 | 9.42E-03 | 7.70E-03 | 2.10E-03 | 6.27E-01 | 7.29E-01 | 9.15E-01 |
| <i>pcs</i>        | FBgn0033988 | FBpp0290722   | Cobs_09077 | 0 | 5.18 | 5.79 | 5.63 | 5.61 | 3.16E-02 | 2.40E-02 | 2.50E-03 | 3.92E-01 | 4.12E-01 | 9.61E-01 |
| <i>CG17005</i>    | FBgn0032109 | FBpp0271694   | Cobs_09388 | 0 | 5.29 | 5.71 | 5.62 | 6.25 | 2.32E-02 | 3.87E-07 | 2.95E-03 | 2.23E-04 | 5.52E-01 | 2.27E-04 |
| <i>CG6388</i>     | FBgn0032430 | FBpp0079949   | Cobs_09418 | 0 | 4.64 | 3.96 | 3.72 | 3.97 | 1.63E-03 | 1.33E-02 | 8.40E-03 | 8.66E-01 | 3.95E-01 | 3.67E-01 |
| <i>CG11360</i>    | FBgn0039920 | FBpp0088160   | Cobs_09424 | 1 | 4.06 | 3.35 | 3.24 | 3.61 | 9.35E-04 | 3.41E-02 | 1.74E-03 | 2.57E-01 | 6.72E-01 | 1.40E-01 |
| <i>CG11360</i>    | FBgn0039920 | FBpp0088160   | Cobs_09425 | 0 | 3.60 | 2.94 | 2.90 | 2.94 | 1.70E-02 | 1.93E-02 | 1.42E-02 | 9.02E-01 | 9.80E-01 | 9.06E-01 |
| <i>NA</i>         | NA          | No hits found | Cobs_09478 | 0 | 2.84 | 1.31 | 2.14 | 1.54 | 3.01E-02 | 5.38E-04 | 7.13E-05 | 5.02E-01 | 1.87E-02 | 1.76E-01 |
| <i>ft</i>         | FBgn0001075 | FBpp0077167   | Cobs_09482 | 0 | 4.89 | 3.45 | 3.86 | 3.41 | 6.74E-04 | 1.63E-05 | 1.15E-05 | 9.67E-01 | 1.28E-01 | 2.20E-01 |
| <i>ft</i>         | FBgn0001075 | FBpp0077167   | Cobs_09486 | 1 | 7.78 | 6.49 | 7.12 | 6.48 | 4.72E-03 | 1.45E-06 | 1.34E-06 | 9.68E-01 | 2.90E-03 | 7.90E-03 |
| <i>inv</i>        | FBgn0001269 | FBpp0087175   | Cobs_09560 | 0 | 5.29 | 4.39 | 4.59 | 4.53 | 6.46E-03 | 3.38E-03 | 5.74E-04 | 5.23E-01 | 4.55E-01 | 9.79E-01 |
| <i>NA</i>         | NA          | No hits found | Cobs_09563 | 0 | 1.73 | 0.48 | 0.68 | 0.71 | 5.64E-03 | 6.38E-03 | 1.13E-03 | 5.29E-01 | 6.27E-01 | 9.03E-01 |
| <i>en</i>         | FBgn0000577 | FBpp0087198   | Cobs_09569 | 0 | 2.65 | 1.86 | 1.41 | 1.93 | 1.06E-05 | 8.47E-04 | 3.52E-04 | 7.88E-01 | 4.76E-02 | 4.32E-02 |
| <i>en</i>         | FBgn0000577 | FBpp0087198   | Cobs_09570 | 1 | 3.46 | 2.51 | 2.85 | 2.73 | 4.47E-02 | 1.82E-02 | 2.05E-03 | 4.19E-01 | 2.30E-01 | 8.56E-01 |
| -                 | -           | FBpp0071228   | Cobs_09716 | 0 | 2.90 | 1.56 | 1.54 | 1.35 | 8.47E-04 | 9.94E-05 | 3.29E-04 | 6.72E-01 | 9.08E-01 | 6.37E-01 |
| -                 | -           | FBpp0288532   | Cobs_09721 | 0 | 7.32 | 6.28 | 6.49 | 6.27 | 1.11E-04 | 1.53E-06 | 1.68E-06 | 9.67E-01 | 1.99E-01 | 2.53E-01 |
| <i>Mcr</i>        | FBgn0264800 | FBpp0079165   | Cobs_09736 | 1 | 7.15 | 6.67 | 6.65 | 6.36 | 1.27E-02 | 8.76E-05 | 1.01E-02 | 8.19E-02 | 9.14E-01 | 1.54E-01 |
| <i>vih</i>        | FBgn0264848 | FBpp0075690   | Cobs_09766 | 1 | 6.51 | 6.19 | 6.13 | 6.24 | 5.93E-03 | 3.26E-02 | 1.32E-02 | 7.22E-01 | 6.31E-01 | 4.47E-01 |
| <i>l(1)G0255</i>  | FBgn0028336 | FBpp0070915   | Cobs_09792 | 0 | 7.19 | 7.61 | 7.61 | 8.11 | 2.40E-02 | 8.85E-06 | 1.36E-02 | 4.59E-03 | 9.81E-01 | 1.05E-02 |
| <i>bi</i>         | FBgn0000179 | FBpp0289836   | Cobs_09798 | 0 | 4.09 | 3.50 | 3.51 | 3.21 | 1.91E-02 | 6.43E-04 | 1.22E-02 | 2.96E-01 | 9.52E-01 | 3.14E-01 |
| <i>bi</i>         | FBgn0000179 | FBpp0289836   | Cobs_09802 | 0 | 3.43 | 2.81 | 2.44 | 2.32 | 2.89E-03 | 1.18E-03 | 3.10E-02 | 2.16E-01 | 2.60E-01 | 8.91E-01 |
| <i>MICAL-like</i> | FBgn0036333 | FBpp0075632   | Cobs_09883 | 1 | 7.10 | 6.73 | 6.73 | 6.37 | 2.96E-02 | 3.97E-05 | 2.00E-02 | 1.83E-02 | 9.91E-01 | 3.62E-02 |
| <i>sano</i>       | FBgn0034408 | FBpp0288739   | Cobs_09906 | 1 | 5.05 | 4.07 | 4.49 | 3.98 | 2.14E-02 | 6.39E-05 | 1.68E-04 | 7.38E-01 | 7.75E-02 | 6.00E-02 |

|                    |             |             |            |   |       |      |      |      |          |          |          |          |          |          |
|--------------------|-------------|-------------|------------|---|-------|------|------|------|----------|----------|----------|----------|----------|----------|
| <i>eya</i>         | FBgn0000320 | FBpp0297250 | Cobs_09948 | 1 | 6.07  | 5.53 | 5.53 | 5.03 | 1.48E-02 | 2.37E-05 | 9.83E-03 | 2.10E-02 | 9.90E-01 | 3.86E-02 |
| <i>CG2224</i>      | FBgn0039773 | FBpp0085053 | Cobs_09954 | 1 | 4.54  | 5.08 | 5.15 | 5.18 | 2.16E-02 | 9.70E-03 | 2.99E-02 | 7.39E-01 | 7.93E-01 | 9.48E-01 |
| <i>CG6115</i>      | FBgn0040985 | FBpp0080512 | Cobs_09959 | 1 | 3.15  | 3.96 | 4.28 | 4.47 | 1.29E-03 | 1.01E-04 | 1.19E-02 | 7.86E-02 | 2.56E-01 | 6.04E-01 |
| <i>Su(dx)</i>      | FBgn0003557 | FBpp0077496 | Cobs_10050 | 1 | 7.56  | 8.09 | 8.01 | 7.94 | 1.89E-02 | 2.55E-02 | 3.19E-03 | 4.19E-01 | 6.60E-01 | 7.94E-01 |
| <i>His3.3A</i>     | FBgn0014857 | FBpp0078649 | Cobs_10112 | 0 | 10.05 | 9.70 | 9.15 | 9.70 | 4.97E-05 | 3.87E-02 | 4.42E-02 | 9.96E-01 | 1.70E-03 | 5.41E-03 |
| <i>CG12880</i>     | FBgn0046258 | FBpp0084587 | Cobs_10118 | 1 | 4.05  | 3.24 | 3.00 | 2.59 | 3.78E-03 | 2.54E-04 | 1.18E-02 | 1.36E-01 | 5.80E-01 | 4.14E-01 |
| <i>CG42361</i>     | FBgn0259707 | FBpp0289237 | Cobs_10122 | 1 | 3.96  | 4.45 | 4.57 | 4.37 | 4.01E-03 | 2.31E-02 | 1.38E-02 | 8.45E-01 | 5.35E-01 | 4.69E-01 |
| <i>CHES-1-like</i> | FBgn0029504 | FBpp0111859 | Cobs_10262 | 1 | 7.18  | 7.70 | 7.77 | 7.71 | 2.63E-03 | 2.39E-03 | 3.23E-03 | 9.73E-01 | 7.27E-01 | 8.26E-01 |
| <i>borr</i>        | FBgn0032105 | FBpp0079416 | Cobs_10303 | 1 | 5.63  | 4.86 | 5.20 | 5.20 | 2.62E-02 | 1.76E-02 | 1.47E-04 | 6.71E-02 | 6.18E-02 | 9.84E-01 |
| <i>nkd</i>         | FBgn0002945 | FBpp0074806 | Cobs_10315 | 1 | 6.43  | 5.85 | 5.88 | 5.80 | 5.58E-03 | 1.12E-03 | 2.19E-03 | 8.66E-01 | 9.04E-01 | 8.12E-01 |
| <i>ColV</i>        | FBgn0032833 | FBpp0080836 | Cobs_10416 | 1 | 8.13  | 8.56 | 8.56 | 9.23 | 4.19E-02 | 5.49E-06 | 3.14E-02 | 1.28E-03 | 9.75E-01 | 3.92E-03 |
| <i>CG42374</i>     | FBgn0259720 | FBpp0289252 | Cobs_10499 | 0 | 2.03  | 0.82 | 1.12 | 1.25 | 3.16E-03 | 8.75E-03 | 1.71E-04 | 1.43E-01 | 3.24E-01 | 6.89E-01 |
| <i>sni</i>         | FBgn0030026 | FBpp0071131 | Cobs_10631 | 1 | 6.09  | 6.77 | 6.76 | 6.79 | 2.88E-02 | 1.21E-02 | 1.66E-02 | 9.61E-01 | 9.71E-01 | 9.45E-01 |
| <i>Sema-1a</i>     | FBgn0011259 | FBpp0292882 | Cobs_10738 | 0 | 5.70  | 5.03 | 5.19 | 5.12 | 1.23E-02 | 2.43E-03 | 8.80E-04 | 7.10E-01 | 4.19E-01 | 7.95E-01 |
| <i>Cirl</i>        | FBgn0033313 | FBpp0290577 | Cobs_10832 | 1 | 5.58  | 4.98 | 5.09 | 4.94 | 2.57E-02 | 2.92E-03 | 4.97E-03 | 9.07E-01 | 6.39E-01 | 6.25E-01 |
| <i>Wnt2</i>        | FBgn0004360 | FBpp0087596 | Cobs_10912 | 0 | 2.39  | 1.71 | 1.64 | 1.67 | 2.09E-02 | 3.27E-02 | 2.65E-02 | 9.40E-01 | 8.66E-01 | 8.50E-01 |
| <i>CG13921</i>     | FBgn0035267 | FBpp0292224 | Cobs_10944 | 1 | 4.70  | 3.46 | 3.77 | 3.44 | 1.10E-03 | 4.43E-05 | 3.74E-05 | 9.86E-01 | 2.75E-01 | 3.53E-01 |
| <i>CG16791</i>     | FBgn0038881 | FBpp0083494 | Cobs_11063 | 0 | 4.93  | 4.32 | 4.19 | 4.16 | 3.09E-04 | 9.35E-05 | 9.98E-04 | 4.22E-01 | 4.94E-01 | 9.15E-01 |
| <i>CG5708</i>      | FBgn0032196 | FBpp0079546 | Cobs_11144 | 0 | 2.75  | 1.86 | 1.48 | 1.79 | 1.07E-03 | 4.68E-03 | 7.44E-03 | 9.11E-01 | 3.37E-01 | 5.24E-01 |
| <i>Fur2</i>        | FBgn0004598 | FBpp0290516 | Cobs_11175 | 1 | 5.29  | 4.68 | 4.76 | 4.54 | 3.75E-02 | 2.42E-03 | 1.22E-02 | 6.14E-01 | 7.53E-01 | 4.52E-01 |
| <i>Pvf3</i>        | FBgn0085407 | FBpp0290740 | Cobs_11213 | 0 | 2.61  | 1.71 | 1.59 | 1.31 | 3.49E-03 | 2.87E-04 | 7.20E-03 | 2.52E-01 | 7.22E-01 | 5.02E-01 |
| <i>Skeletor</i>    | FBgn0262717 | FBpp0296944 | Cobs_11504 | 1 | 8.61  | 8.06 | 7.78 | 7.06 | 1.88E-03 | 5.16E-07 | 2.00E-02 | 1.01E-04 | 2.13E-01 | 5.90E-03 |
| -                  | -           | FBpp0293258 | Cobs_11515 | 1 | 5.67  | 4.99 | 5.20 | 5.02 | 1.36E-02 | 5.66E-04 | 3.31E-04 | 8.60E-01 | 2.18E-01 | 4.12E-01 |
| <i>vfl</i>         | FBgn0259789 | FBpp0074577 | Cobs_11536 | 1 | 7.26  | 6.58 | 6.64 | 6.61 | 3.72E-03 | 1.17E-03 | 8.16E-04 | 8.79E-01 | 7.66E-01 | 9.34E-01 |
| <i>boi</i>         | FBgn0040388 | FBpp0292890 | Cobs_11760 | 1 | 6.47  | 5.78 | 5.79 | 5.53 | 7.83E-03 | 2.66E-04 | 4.22E-03 | 3.48E-01 | 9.78E-01 | 3.88E-01 |
| <i>kin17</i>       | FBgn0024887 | FBpp0077839 | Cobs_11796 | 1 | 4.07  | 4.58 | 4.55 | 4.59 | 3.79E-02 | 1.61E-02 | 1.82E-02 | 9.93E-01 | 8.69E-01 | 9.13E-01 |
| <i>ds</i>          | FBgn0000497 | FBpp0077708 | Cobs_12028 | 0 | 5.25  | 3.52 | 4.19 | 3.91 | 1.06E-03 | 7.59E-05 | 5.99E-06 | 2.31E-01 | 3.51E-02 | 5.34E-01 |
| <i>ds</i>          | FBgn0000497 | FBpp0077708 | Cobs_12039 | 1 | 5.80  | 4.49 | 4.92 | 4.49 | 1.88E-04 | 8.18E-07 | 7.70E-07 | 9.71E-01 | 2.91E-02 | 6.46E-02 |
| <i>CG8192</i>      | FBgn0034030 | FBpp0086487 | Cobs_12094 | 1 | 4.19  | 3.49 | 3.13 | 3.38 | 1.98E-04 | 9.19E-04 | 3.19E-03 | 7.00E-01 | 1.62E-01 | 4.57E-01 |

|                |             |               |            |   |       |       |       |       |          |          |          |          |          |          |
|----------------|-------------|---------------|------------|---|-------|-------|-------|-------|----------|----------|----------|----------|----------|----------|
| NA             | NA          | No hits found | Cobs_12136 | 0 | 9.30  | 8.63  | 8.94  | 8.51  | 4.66E-02 | 3.31E-05 | 2.14E-04 | 4.91E-01 | 5.33E-02 | 2.03E-02 |
| <i>Akap200</i> | FBgn0027932 | FBpp0079279   | Cobs_12137 | 0 | 8.21  | 7.51  | 7.68  | 7.29  | 8.57E-03 | 1.76E-05 | 3.45E-04 | 2.46E-01 | 3.47E-01 | 5.57E-02 |
| <i>CG3726</i>  | FBgn0029824 | FBpp0070823   | Cobs_12204 | 0 | 6.23  | 5.58  | 5.53  | 5.48  | 5.22E-03 | 1.76E-03 | 5.99E-03 | 7.22E-01 | 8.20E-01 | 9.23E-01 |
| <i>CG10973</i> | FBgn0036306 | FBpp0099759   | Cobs_12244 | 1 | 7.34  | 8.09  | 7.68  | 7.66  | 4.44E-02 | 3.58E-02 | 2.90E-05 | 7.53E-03 | 9.08E-03 | 9.39E-01 |
| <i>DI</i>      | FBgn0000463 | FBpp0293200   | Cobs_12248 | 1 | 3.59  | 3.08  | 2.89  | 3.07  | 8.78E-03 | 2.99E-02 | 4.36E-02 | 9.28E-01 | 4.52E-01 | 6.27E-01 |
| <i>CG31998</i> | FBgn0051998 | FBpp0088212   | Cobs_12268 | 1 | 6.21  | 5.31  | 5.49  | 5.24  | 1.06E-03 | 1.88E-05 | 3.45E-05 | 7.72E-01 | 3.38E-01 | 2.59E-01 |
| <i>mthl5</i>   | FBgn0037960 | FBpp0081989   | Cobs_12321 | 1 | 5.38  | 4.91  | 4.74  | 4.57  | 1.82E-03 | 1.01E-04 | 9.83E-03 | 9.47E-02 | 3.74E-01 | 5.21E-01 |
| <i>fax</i>     | FBgn0014163 | FBpp0099913   | Cobs_12344 | 1 | 6.80  | 6.23  | 6.14  | 6.06  | 4.66E-04 | 4.82E-05 | 7.95E-04 | 3.23E-01 | 6.03E-01 | 7.29E-01 |
| <i>CG13003</i> | FBgn0030798 | FBpp0074123   | Cobs_12366 | 1 | 5.50  | 4.50  | 4.87  | 4.66  | 1.50E-02 | 1.12E-03 | 2.10E-04 | 5.55E-01 | 1.32E-01 | 5.26E-01 |
| <i>uif</i>     | FBgn0031879 | FBpp0288558   | Cobs_12438 | 1 | 8.61  | 8.01  | 8.09  | 7.51  | 2.32E-02 | 1.37E-05 | 5.31E-03 | 1.60E-02 | 7.39E-01 | 1.47E-02 |
| <i>llp1</i>    | FBgn0044051 | FBpp0076057   | Cobs_12454 | 0 | 4.54  | 1.24  | 2.66  | 2.17  | 1.22E-02 | 2.84E-03 | 4.74E-04 | 3.49E-01 | 1.11E-01 | 6.81E-01 |
| <i>CG12006</i> | FBgn0035464 | FBpp0073009   | Cobs_12525 | 1 | 4.23  | 4.76  | 4.70  | 4.68  | 1.04E-02 | 7.95E-03 | 2.45E-03 | 6.78E-01 | 7.29E-01 | 9.47E-01 |
| <i>CG33502</i> | FBgn0053502 | FBpp0070054   | Cobs_12562 | 0 | 4.46  | 4.88  | 5.21  | 5.01  | 1.88E-04 | 1.77E-03 | 1.52E-02 | 4.85E-01 | 3.23E-02 | 2.54E-01 |
| -              | -           | FBpp0074593   | Cobs_12566 | 0 | 10.15 | 12.27 | 12.15 | 12.60 | 2.40E-02 | 2.88E-03 | 1.01E-02 | 7.28E-01 | 9.05E-01 | 6.93E-01 |
| <i>Doc1</i>    | FBgn0028789 | FBpp0076249   | Cobs_12581 | 1 | 1.46  | 0.27  | 0.55  | 0.49  | 3.82E-02 | 1.57E-02 | 5.23E-03 | 6.75E-01 | 4.92E-01 | 8.91E-01 |
| <i>Sec24AB</i> | FBgn0033460 | FBpp0087536   | Cobs_12690 | 1 | 8.26  | 8.50  | 8.53  | 8.54  | 3.36E-02 | 1.49E-02 | 4.79E-02 | 7.26E-01 | 7.76E-01 | 9.56E-01 |
| <i>CG42747</i> | FBgn0261801 | FBpp0292362   | Cobs_12753 | 1 | 2.95  | 2.29  | 2.13  | 1.79  | 1.39E-03 | 5.93E-05 | 6.55E-03 | 7.08E-02 | 4.52E-01 | 3.47E-01 |
| <i>Egfr</i>    | FBgn0003731 | FBpp0071570   | Cobs_12930 | 1 | 7.23  | 6.58  | 6.84  | 6.56  | 3.65E-02 | 2.76E-04 | 3.87E-04 | 9.50E-01 | 1.10E-01 | 1.46E-01 |
| NA             | NA          | No hits found | Cobs_12932 | 0 | 1.83  | 0.73  | 1.11  | 1.01  | 4.47E-02 | 2.64E-02 | 3.71E-03 | 4.59E-01 | 3.38E-01 | 9.36E-01 |
| <i>Tollo</i>   | FBgn0029114 | FBpp0075360   | Cobs_12951 | 0 | 5.20  | 4.43  | 4.58  | 4.22  | 1.86E-02 | 3.84E-04 | 2.52E-03 | 5.25E-01 | 5.43E-01 | 2.48E-01 |
| <i>CG13926</i> | FBgn0035243 | FBpp0072703   | Cobs_13016 | 1 | 4.92  | 5.42  | 5.46  | 5.41  | 7.16E-03 | 8.70E-03 | 8.36E-03 | 9.63E-01 | 8.23E-01 | 8.38E-01 |
| -              | -           | FBpp0078841   | Cobs_13179 | 0 | 3.85  | 2.51  | 2.92  | 2.73  | 4.21E-03 | 7.03E-04 | 1.04E-04 | 5.04E-01 | 1.73E-01 | 6.67E-01 |
| NA             | NA          | No hits found | Cobs_13195 | 0 | 5.30  | 3.69  | 4.02  | 3.21  | 2.19E-04 | 1.53E-06 | 1.12E-05 | 2.86E-01 | 3.04E-01 | 5.74E-02 |
| <i>Dap160</i>  | FBgn0023388 | FBpp0290491   | Cobs_13212 | 0 | 4.71  | 4.12  | 3.92  | 4.12  | 3.24E-03 | 1.38E-02 | 1.63E-02 | 9.90E-01 | 4.31E-01 | 5.39E-01 |
| <i>cas</i>     | FBgn0004878 | FBpp0078374   | Cobs_13214 | 1 | 6.37  | 5.63  | 5.75  | 5.90  | 3.21E-03 | 1.16E-02 | 3.21E-04 | 1.74E-01 | 5.60E-01 | 5.38E-01 |
| <i>disco-r</i> | FBgn0042650 | FBpp0074029   | Cobs_13363 | 1 | 5.83  | 4.62  | 4.97  | 4.86  | 2.37E-03 | 4.78E-04 | 3.45E-05 | 3.49E-01 | 1.70E-01 | 8.18E-01 |
| <i>ovo</i>     | FBgn0003028 | FBpp0070708   | Cobs_13506 | 1 | 4.38  | 3.83  | 3.49  | 3.54  | 6.33E-04 | 7.56E-04 | 1.62E-02 | 2.70E-01 | 1.26E-01 | 8.43E-01 |
| <i>mt:ND4</i>  | FBgn0262952 | FBpp0100183   | Cobs_13777 | 1 | 5.29  | 6.04  | 6.10  | 6.44  | 3.03E-04 | 1.53E-06 | 2.95E-04 | 2.67E-02 | 7.42E-01 | 9.75E-02 |
| <i>wee</i>     | FBgn0011737 | FBpp0078999   | Cobs_13922 | 1 | 6.03  | 5.53  | 5.72  | 5.55  | 4.69E-02 | 1.20E-03 | 1.02E-03 | 9.32E-01 | 1.64E-01 | 2.85E-01 |



|                |             |               |            |   |      |      |      |      |          |          |          |          |          |          |
|----------------|-------------|---------------|------------|---|------|------|------|------|----------|----------|----------|----------|----------|----------|
| <i>v</i>       | FBgn0003965 | FBpp0073242   | Cobs_14037 | 1 | 6.06 | 3.98 | 4.13 | 4.25 | 2.66E-04 | 2.49E-04 | 5.52E-05 | 5.99E-01 | 7.84E-01 | 8.47E-01 |
| <i>wgn</i>     | FBgn0030941 | FBpp0074388   | Cobs_14174 | 1 | 3.64 | 2.92 | 2.96 | 2.68 | 1.41E-02 | 6.21E-04 | 7.66E-03 | 3.86E-01 | 9.05E-01 | 3.60E-01 |
| <i>Sox100B</i> | FBgn0024288 | FBpp0085097   | Cobs_14342 | 1 | 3.34 | 2.70 | 2.52 | 2.08 | 4.66E-03 | 9.45E-05 | 1.86E-02 | 4.45E-02 | 5.30E-01 | 2.13E-01 |
| -              | -           | FBpp0293081   | Cobs_14410 | 0 | 5.18 | 3.84 | 2.50 | 4.29 | 1.34E-06 | 5.62E-03 | 3.20E-04 | 2.66E-01 | 2.22E-03 | 5.53E-04 |
| <i>Np</i>      | FBgn0265011 | FBpp0300317   | Cobs_14489 | 1 | 4.87 | 3.22 | 3.89 | 3.77 | 9.42E-03 | 2.86E-03 | 8.60E-05 | 1.73E-01 | 7.80E-02 | 8.49E-01 |
| <i>Mocs1</i>   | FBgn0263241 | FBpp0075935   | Cobs_14554 | 1 | 5.07 | 5.41 | 5.68 | 5.62 | 1.06E-03 | 1.21E-03 | 4.27E-02 | 1.97E-01 | 7.38E-02 | 7.83E-01 |
| <i>ss</i>      | FBgn0003513 | FBpp0082768   | Cobs_14658 | 1 | 3.85 | 2.43 | 2.99 | 2.68 | 1.20E-02 | 1.42E-03 | 1.57E-04 | 4.29E-01 | 9.77E-02 | 5.73E-01 |
| <i>CG3961</i>  | FBgn0036821 | FBpp0074845   | Cobs_14706 | 1 | 6.87 | 7.46 | 7.54 | 7.84 | 3.85E-03 | 4.01E-05 | 5.53E-03 | 6.49E-02 | 7.18E-01 | 2.10E-01 |
| <i>robo</i>    | FBgn0005631 | FBpp0071833   | Cobs_14764 | 0 | 6.13 | 5.32 | 5.40 | 5.50 | 2.51E-03 | 4.40E-03 | 5.07E-04 | 4.21E-01 | 7.51E-01 | 7.11E-01 |
| <i>Nrt</i>     | FBgn0004108 | FBpp0292987   | Cobs_15037 | 1 | 6.83 | 6.38 | 6.43 | 6.46 | 1.37E-02 | 1.03E-02 | 2.68E-03 | 6.18E-01 | 7.06E-01 | 9.26E-01 |
| <i>NetA</i>    | FBgn0015773 | FBpp0300656   | Cobs_15088 | 1 | 3.98 | 3.35 | 2.99 | 3.36 | 3.10E-04 | 1.10E-02 | 7.85E-03 | 8.98E-01 | 1.32E-01 | 1.50E-01 |
| <i>CG10907</i> | FBgn0036207 | FBpp0075761   | Cobs_15111 | 1 | 5.09 | 5.70 | 5.84 | 5.75 | 3.99E-03 | 5.66E-03 | 1.14E-02 | 8.70E-01 | 5.62E-01 | 7.86E-01 |
| <i>H</i>       | FBgn0001169 | FBpp0083324   | Cobs_15150 | 1 | 6.74 | 7.66 | 7.93 | 7.50 | 5.73E-03 | 4.54E-02 | 1.87E-02 | 7.24E-01 | 5.03E-01 | 3.53E-01 |
| <i>Traf4</i>   | FBgn0026319 | FBpp0077119   | Cobs_15214 | 0 | 3.90 | 3.26 | 3.30 | 3.04 | 3.79E-02 | 2.86E-03 | 2.34E-02 | 4.80E-01 | 9.14E-01 | 4.53E-01 |
| <i>Pex3</i>    | FBgn0036484 | FBpp0075393   | Cobs_15220 | 1 | 6.67 | 7.32 | 7.22 | 7.39 | 4.66E-02 | 4.77E-03 | 1.23E-02 | 8.04E-01 | 7.22E-01 | 6.01E-01 |
| <i>Dll</i>     | FBgn0000157 | FBpp0289353   | Cobs_15290 | 1 | 2.91 | 1.22 | 1.67 | 1.67 | 5.79E-04 | 3.45E-04 | 1.49E-05 | 2.14E-01 | 1.86E-01 | 9.93E-01 |
| -              | -           | FBpp0079793   | Cobs_15304 | 0 | 7.56 | 6.86 | 7.01 | 6.60 | 1.88E-02 | 7.07E-05 | 1.71E-03 | 2.59E-01 | 4.97E-01 | 9.82E-02 |
| <i>NA</i>      | NA          | No hits found | Cobs_15312 | 0 | 4.63 | 3.95 | 4.16 | 3.76 | 2.91E-02 | 1.82E-04 | 1.42E-03 | 4.84E-01 | 2.83E-01 | 1.04E-01 |
| <i>smo</i>     | FBgn0003444 | FBpp0077788   | Cobs_15378 | 1 | 5.71 | 5.20 | 5.23 | 4.82 | 1.53E-02 | 3.90E-05 | 5.90E-03 | 5.35E-02 | 8.63E-01 | 5.46E-02 |
| <i>CG10237</i> | FBgn0032783 | FBpp0300885   | Cobs_15380 | 0 | 4.63 | 3.91 | 4.06 | 3.80 | 7.58E-03 | 1.85E-04 | 8.36E-04 | 6.36E-01 | 4.90E-01 | 2.83E-01 |
| <i>pdgy</i>    | FBgn0027601 | FBpp0292386   | Cobs_15576 | 1 | 5.52 | 6.46 | 6.44 | 6.81 | 2.92E-02 | 1.34E-03 | 1.67E-02 | 3.90E-01 | 9.64E-01 | 4.21E-01 |
| -              | -           | FBpp0289699   | Cobs_15598 | 1 | 5.58 | 4.77 | 4.87 | 4.52 | 3.52E-03 | 5.39E-05 | 7.49E-04 | 3.42E-01 | 7.05E-01 | 2.16E-01 |
| <i>Teng13</i>  | FBgn0051679 | FBpp0077486   | Cobs_15606 | 0 | 5.46 | 4.56 | 4.85 | 4.48 | 3.55E-02 | 9.75E-04 | 1.58E-03 | 8.97E-01 | 2.68E-01 | 2.82E-01 |
| <i>CG15358</i> | FBgn0031373 | FBpp0077560   | Cobs_15658 | 0 | 4.82 | 3.44 | 3.67 | 3.54 | 1.74E-04 | 2.37E-05 | 8.15E-06 | 7.04E-01 | 3.63E-01 | 7.49E-01 |
| <i>fd96Ca</i>  | FBgn0004897 | FBpp0084145   | Cobs_15675 | 1 | 2.36 | 0.20 | 0.66 | 0.96 | 2.32E-02 | 3.05E-02 | 3.30E-03 | 3.69E-01 | 5.09E-01 | 8.55E-01 |
| <i>Rab19</i>   | FBgn0015793 | FBpp0076428   | Cobs_15820 | 1 | 3.12 | 3.82 | 3.59 | 3.60 | 3.87E-02 | 2.16E-02 | 1.41E-03 | 3.08E-01 | 2.21E-01 | 9.51E-01 |
| <i>ko</i>      | FBgn0020294 | FBpp0077980   | Cobs_15892 | 0 | 2.47 | 1.46 | 1.65 | 1.39 | 1.81E-02 | 2.88E-03 | 3.93E-03 | 9.42E-01 | 6.20E-01 | 6.46E-01 |
| <i>CG9876</i>  | FBgn0034821 | FBpp0071889   | Cobs_15898 | 1 | 2.47 | 1.74 | 1.36 | 0.99 | 1.06E-03 | 4.07E-05 | 1.44E-02 | 2.39E-02 | 2.15E-01 | 3.40E-01 |
| <i>CG14688</i> | FBgn0037819 | FBpp0112127   | Cobs_15913 | 0 | 5.14 | 6.49 | 6.52 | 7.91 | 3.70E-02 | 6.39E-05 | 3.04E-02 | 1.74E-02 | 9.53E-01 | 3.89E-02 |

|         |             |               |            |   |      |      |      |      |          |          |          |          |          |          |
|---------|-------------|---------------|------------|---|------|------|------|------|----------|----------|----------|----------|----------|----------|
| NA      | NA          | No hits found | Cobs_15949 | 0 | 4.13 | 1.53 | 2.93 | 2.44 | 3.15E-02 | 1.95E-03 | 1.71E-04 | 2.44E-01 | 2.40E-02 | 3.82E-01 |
| CG5151  | FBgn0036576 | FBpp0300176   | Cobs_15971 | 0 | 5.05 | 3.62 | 4.03 | 4.37 | 1.38E-03 | 1.46E-02 | 2.90E-05 | 1.62E-02 | 1.92E-01 | 3.06E-01 |
| NA      | NA          | No hits found | Cobs_15977 | 0 | 1.27 | 0.12 | 0.26 | 0.28 | 4.02E-02 | 3.22E-02 | 1.43E-02 | 7.60E-01 | 7.76E-01 | 9.75E-01 |
| lr21a   | FBgn0031209 | FBpp0111921   | Cobs_15987 | 0 | 3.13 | 2.01 | 2.22 | 2.26 | 1.51E-02 | 1.49E-02 | 2.27E-03 | 4.84E-01 | 5.28E-01 | 9.36E-01 |
| fz2     | FBgn0016797 | FBpp0288861   | Cobs_15996 | 1 | 2.60 | 1.96 | 1.73 | 1.47 | 1.69E-02 | 2.26E-03 | 4.17E-02 | 2.75E-01 | 6.45E-01 | 6.04E-01 |
| CG7102  | FBgn0031961 | FBpp0079181   | Cobs_15999 | 1 | 5.22 | 4.43 | 4.76 | 4.68 | 5.67E-03 | 1.06E-03 | 2.34E-05 | 1.53E-01 | 4.97E-02 | 7.64E-01 |
| CG43066 | FBgn0262476 | FBpp0293405   | Cobs_16158 | 1 | 4.65 | 5.16 | 5.18 | 5.09 | 7.47E-03 | 1.21E-02 | 6.07E-03 | 8.00E-01 | 9.29E-01 | 7.76E-01 |
| imd     | FBgn0013983 | FBpp0085904   | Cobs_16379 | 1 | 3.49 | 2.95 | 3.02 | 2.97 | 3.97E-02 | 2.07E-02 | 1.57E-02 | 9.09E-01 | 7.74E-01 | 9.23E-01 |
| CG3501  | FBgn0034791 | FBpp0071818   | Cobs_16491 | 1 | 6.29 | 6.84 | 6.75 | 6.72 | 2.40E-02 | 2.02E-02 | 3.95E-03 | 5.33E-01 | 6.34E-01 | 9.15E-01 |
| fng     | FBgn0011591 | FBpp0077925   | Cobs_16499 | 0 | 3.16 | 2.26 | 2.58 | 1.74 | 3.95E-02 | 5.14E-05 | 2.38E-03 | 1.31E-01 | 2.78E-01 | 2.10E-02 |
| Cad74A  | FBgn0036715 | FBpp0075002   | Cobs_16530 | 1 | 6.33 | 5.42 | 5.85 | 4.94 | 2.24E-02 | 5.16E-07 | 4.59E-05 | 2.06E-02 | 2.92E-02 | 3.79E-04 |
| Cad96Ca | FBgn0022800 | FBpp0084248   | Cobs_16558 | 0 | 4.94 | 4.06 | 4.31 | 3.60 | 4.07E-03 | 1.53E-06 | 1.30E-04 | 4.48E-02 | 2.46E-01 | 6.16E-03 |
| Seipin  | FBgn0040336 | FBpp0070426   | Cobs_16702 | 1 | 5.50 | 6.48 | 6.46 | 6.76 | 2.25E-02 | 1.52E-03 | 1.24E-02 | 4.93E-01 | 9.70E-01 | 5.34E-01 |
| pck     | FBgn0013720 | FBpp0070246   | Cobs_16746 | 1 | 6.94 | 6.54 | 6.29 | 6.32 | 5.79E-04 | 3.13E-04 | 1.49E-02 | 1.68E-01 | 1.02E-01 | 9.08E-01 |
| kek3    | FBgn0028370 | FBpp0290072   | Cobs_16811 | 0 | 1.90 | 0.21 | 0.30 | 0.72 | 3.21E-03 | 1.25E-02 | 1.35E-03 | 3.96E-01 | 8.90E-01 | 5.54E-01 |
| NA      | NA          | No hits found | Cobs_16826 | 0 | 3.53 | 2.23 | 2.43 | 2.35 | 7.20E-05 | 1.63E-05 | 5.77E-06 | 6.70E-01 | 4.05E-01 | 8.23E-01 |
| CG7655  | FBgn0038536 | FBpp0082912   | Cobs_17198 | 1 | 4.33 | 4.86 | 4.85 | 4.86 | 2.62E-02 | 1.37E-02 | 1.62E-02 | 9.92E-01 | 9.68E-01 | 9.71E-01 |
| otk     | FBgn0004839 | FBpp0087135   | Cobs_17272 | 1 | 6.40 | 5.67 | 5.88 | 5.85 | 1.91E-03 | 5.19E-04 | 2.11E-05 | 2.31E-01 | 1.48E-01 | 9.17E-01 |
| otk     | FBgn0004839 | FBpp0087135   | Cobs_17276 | 0 | 3.18 | 2.12 | 2.28 | 2.35 | 1.55E-03 | 1.49E-03 | 1.68E-04 | 4.32E-01 | 5.17E-01 | 9.01E-01 |
| sog     | FBgn0003463 | FBpp0073879   | Cobs_17421 | 1 | 4.80 | 4.16 | 4.18 | 4.12 | 8.59E-03 | 2.50E-03 | 5.27E-03 | 8.53E-01 | 9.74E-01 | 8.58E-01 |
| -       | -           | FBpp0074209   | Cobs_17422 | 1 | 7.38 | 7.00 | 7.05 | 6.57 | 3.56E-02 | 4.11E-06 | 8.65E-03 | 3.14E-03 | 7.15E-01 | 3.26E-03 |
| -       | -           | FBpp0290273   | Cobs_17456 | 1 | 6.90 | 5.83 | 5.93 | 5.74 | 1.34E-03 | 7.59E-05 | 1.99E-04 | 7.70E-01 | 7.16E-01 | 5.63E-01 |
| nrv2    | FBgn0015777 | FBpp0099794   | Cobs_17470 | 1 | 6.37 | 5.70 | 5.82 | 5.90 | 1.17E-02 | 1.71E-02 | 1.37E-03 | 3.35E-01 | 5.59E-01 | 7.79E-01 |
| -       | -           | FBpp0088918   | Cobs_17477 | 1 | 3.22 | 2.49 | 2.39 | 2.11 | 1.22E-02 | 1.78E-03 | 2.35E-02 | 3.55E-01 | 7.39E-01 | 6.23E-01 |
| sob     | FBgn0004892 | FBpp0077247   | Cobs_17576 | 1 | 3.18 | 1.79 | 2.11 | 1.84 | 4.56E-04 | 4.05E-05 | 3.39E-05 | 9.81E-01 | 3.91E-01 | 5.06E-01 |
| bowl    | FBgn0004893 | FBpp0297872   | Cobs_17609 | 1 | 6.41 | 5.44 | 5.45 | 5.17 | 1.11E-04 | 1.72E-06 | 2.29E-05 | 2.38E-01 | 9.35E-01 | 2.51E-01 |
| NA      | NA          | No hits found | Cobs_17653 | 0 | 4.50 | 3.51 | 3.84 | 3.72 | 1.43E-02 | 2.74E-03 | 3.51E-04 | 4.55E-01 | 1.86E-01 | 7.41E-01 |
| sprt    | FBgn0082585 | FBpp0087243   | Cobs_17770 | 1 | 4.46 | 3.21 | 3.45 | 3.32 | 1.98E-04 | 3.31E-05 | 8.90E-06 | 6.65E-01 | 3.00E-01 | 7.11E-01 |
| CG8778  | FBgn0033761 | FBpp0086993   | Cobs_17956 | 1 | 5.62 | 6.31 | 6.44 | 6.45 | 2.40E-02 | 1.19E-02 | 4.12E-02 | 6.99E-01 | 7.12E-01 | 9.80E-01 |

|                |             |             |            |   |      |      |      |      |          |          |          |          |          |          |
|----------------|-------------|-------------|------------|---|------|------|------|------|----------|----------|----------|----------|----------|----------|
| <i>CG5853</i>  | FBgn0032167 | FBpp0079489 | Cobs_17963 | 0 | 6.50 | 6.99 | 7.06 | 7.11 | 2.43E-02 | 7.24E-03 | 3.52E-02 | 6.17E-01 | 7.60E-01 | 8.87E-01 |
| <i>Lac</i>     | FBgn0010238 | FBpp0087044 | Cobs_18017 | 1 | 7.71 | 7.25 | 7.19 | 7.11 | 6.14E-04 | 4.82E-05 | 7.97E-04 | 3.23E-01 | 6.57E-01 | 6.88E-01 |
| <i>Sodh-2</i>  | FBgn0022359 | FBpp0081800 | Cobs_18020 | 0 | 5.80 | 7.35 | 7.73 | 7.31 | 5.60E-04 | 1.67E-03 | 1.51E-03 | 9.43E-01 | 4.36E-01 | 4.69E-01 |
| <i>CG33275</i> | FBgn0035802 | FBpp0088790 | Cobs_18064 | 0 | 3.43 | 2.54 | 2.77 | 2.57 | 3.52E-02 | 9.52E-03 | 5.31E-03 | 8.47E-01 | 4.92E-01 | 7.54E-01 |
| <i>kibra</i>   | FBgn0262127 | FBpp0099467 | Cobs_18071 | 1 | 7.06 | 6.62 | 6.67 | 6.19 | 3.37E-02 | 1.61E-05 | 1.01E-02 | 1.21E-02 | 7.67E-01 | 1.21E-02 |
| <i>Lim1</i>    | FBgn0026411 | FBpp0071216 | Cobs_18161 | 1 | 3.98 | 2.96 | 2.89 | 2.92 | 2.66E-03 | 2.37E-03 | 2.75E-03 | 9.82E-01 | 8.89E-01 | 9.35E-01 |
| <i>Notum</i>   | FBgn0044028 | FBpp0075193 | Cobs_18188 | 1 | 3.90 | 3.39 | 3.37 | 3.21 | 1.54E-02 | 1.80E-03 | 1.86E-02 | 4.34E-01 | 8.76E-01 | 6.01E-01 |
| <i>jumu</i>    | FBgn0015396 | FBpp0081715 | Cobs_18284 | 1 | 6.18 | 5.56 | 5.54 | 5.69 | 1.16E-02 | 3.36E-02 | 8.36E-03 | 5.94E-01 | 9.57E-01 | 6.13E-01 |

Supplementary Table S4: List of genes that are either significantly up- or downregulated in WM compared to all three other phenotypes.

The binary flag Orthology is set to 1, if orthology was confirmed in reciprocal blasts. The columns EM, QU, WM, and WO give the mean expression as assessed by limma. The last six columns give FDR values for pairwise comparisons, also produced with limma.

| FB gene symbol | FB gene ID  | FB protein ID | C.obs ID   | Orthol. | EM   | QU   | WM    | WO   | EM vs WM | EM vs WO | EM vs QU | QU vs WO | QU vs WM | WO vs WM |
|----------------|-------------|---------------|------------|---------|------|------|-------|------|----------|----------|----------|----------|----------|----------|
| <i>CG10934</i> | FBgn0034263 | FBpp0086019   | Cobs_00168 | 0       | 4.35 | 4.54 | 3.71  | 4.43 | 7.60E-03 | 7.81E-01 | 3.56E-01 | 5.69E-01 | 2.89E-04 | 5.05E-03 |
| <i>CG40498</i> | FBgn0069969 | FBpp0291544   | Cobs_00171 | 1       | 4.56 | 4.76 | 5.24  | 4.75 | 1.91E-03 | 3.43E-01 | 3.15E-01 | 9.62E-01 | 1.30E-02 | 2.67E-02 |
| <i>kst</i>     | FBgn0004167 | FBpp0289294   | Cobs_00193 | 1       | 9.93 | 9.85 | 10.39 | 9.64 | 2.34E-02 | 9.35E-02 | 6.79E-01 | 2.50E-01 | 3.26E-03 | 6.31E-04 |
| <i>CG32436</i> | FBgn0052436 | FBpp0077999   | Cobs_00328 | 1       | 1.87 | 1.63 | 0.30  | 1.63 | 3.45E-03 | 7.40E-01 | 7.12E-01 | 9.81E-01 | 5.19E-03 | 1.37E-02 |
| <i>CG18278</i> | FBgn0033836 | FBpp0086833   | Cobs_00329 | 1       | 4.73 | 5.18 | 3.31  | 4.37 | 3.03E-04 | 1.79E-01 | 1.44E-01 | 5.76E-03 | 4.06E-06 | 1.05E-02 |
| <i>mAChR-B</i> | FBgn0037546 | FBpp0081285   | Cobs_00650 | 1       | 3.12 | 1.94 | 3.86  | 2.69 | 2.31E-02 | 2.48E-01 | 2.60E-03 | 5.10E-02 | 1.01E-05 | 2.70E-03 |
| <i>CG6188</i>  | FBgn0038074 | FBpp0082120   | Cobs_00805 | 1       | 4.50 | 5.20 | 6.52  | 4.17 | 8.44E-03 | 7.67E-01 | 3.88E-01 | 2.18E-01 | 3.80E-02 | 6.09E-03 |
| NA             | NA          | No hits found | Cobs_00927 | 0       | 1.75 | 1.69 | 2.75  | 1.65 | 1.04E-02 | 9.37E-01 | 8.06E-01 | 8.79E-01 | 2.59E-03 | 1.37E-02 |
| <i>Sik2</i>    | FBgn0025625 | FBpp0070326   | Cobs_00973 | 1       | 6.60 | 7.06 | 6.07  | 6.55 | 2.16E-02 | 8.43E-01 | 2.56E-02 | 1.29E-02 | 3.47E-05 | 4.24E-02 |
| <i>CG1732</i>  | FBgn0039915 | FBpp0088910   | Cobs_00975 | 0       | 0.97 | 1.87 | -2.45 | 1.20 | 1.74E-04 | 7.03E-01 | 1.23E-01 | 2.96E-01 | 9.72E-07 | 1.05E-04 |
| <i>Rnp4F</i>   | FBgn0014024 | FBpp0111789   | Cobs_01400 | 1       | 5.88 | 5.58 | 6.30  | 5.75 | 2.83E-02 | 5.00E-01 | 8.81E-02 | 3.48E-01 | 1.76E-04 | 6.94E-03 |
| <i>tmod</i>    | FBgn0082582 | FBpp0085024   | Cobs_01588 | 1       | 6.36 | 6.50 | 6.77  | 6.28 | 1.57E-03 | 5.69E-01 | 2.22E-01 | 5.57E-02 | 1.55E-02 | 5.49E-04 |
| NA             | NA          | No hits found | Cobs_01979 | 0       | 1.86 | 1.52 | 3.56  | 2.69 | 6.10E-05 | 1.27E-02 | 5.73E-01 | 3.90E-03 | 8.02E-06 | 2.01E-02 |
| <i>pros</i>    | FBgn0004595 | FBpp0293146   | Cobs_02055 | 0       | 1.26 | 1.45 | -2.44 | 0.91 | 2.71E-05 | 5.89E-01 | 7.71E-01 | 3.69E-01 | 2.99E-06 | 2.27E-04 |
| <i>Rab27</i>   | FBgn0025382 | FBpp0070281   | Cobs_02071 | 1       | 4.22 | 4.32 | 3.68  | 4.17 | 8.66E-03 | 8.04E-01 | 6.25E-01 | 4.19E-01 | 9.74E-04 | 2.43E-02 |
| <i>CG7544</i>  | FBgn0033994 | FBpp0289552   | Cobs_02485 | 1       | 2.27 | 2.17 | 2.85  | 2.29 | 3.02E-03 | 8.19E-01 | 6.97E-01 | 5.02E-01 | 4.91E-04 | 1.05E-02 |
| <i>CG1890</i>  | FBgn0039869 | FBpp0085195   | Cobs_02543 | 1       | 6.49 | 6.39 | 6.92  | 6.51 | 1.69E-02 | 9.49E-01 | 6.06E-01 | 5.39E-01 | 1.76E-03 | 2.46E-02 |
| -              | -           | FBpp0099933   | Cobs_02767 | 1       | 2.79 | 3.07 | 2.20  | 3.05 | 3.30E-02 | 2.38E-01 | 2.01E-01 | 9.36E-01 | 6.46E-04 | 3.16E-03 |
| <i>CG43088</i> | FBgn0262534 | FBpp0293413   | Cobs_02807 | 0       | 2.66 | 2.65 | 3.56  | 2.61 | 2.10E-03 | 9.93E-01 | 9.59E-01 | 9.67E-01 | 8.39E-04 | 3.81E-03 |
| <i>vsg</i>     | FBgn0045823 | FBpp0076130   | Cobs_02819 | 1       | 6.61 | 6.70 | 7.61  | 6.73 | 1.11E-04 | 5.87E-01 | 6.95E-01 | 9.04E-01 | 8.67E-05 | 5.53E-04 |
| <i>CG14967</i> | FBgn0035420 | FBpp0291508   | Cobs_02834 | 1       | 5.00 | 4.99 | 5.38  | 5.04 | 2.08E-02 | 8.92E-01 | 9.87E-01 | 8.72E-01 | 1.02E-02 | 3.78E-02 |
| NA             | NA          | No hits found | Cobs_02937 | 0       | 1.16 | 1.03 | 2.32  | 1.32 | 3.51E-03 | 5.58E-01 | 8.71E-01 | 4.34E-01 | 1.21E-03 | 2.74E-02 |
| <i>Bgb</i>     | FBgn0013753 | FBpp0072641   | Cobs_03105 | 1       | 3.71 | 4.04 | 3.09  | 3.77 | 4.72E-03 | 8.92E-01 | 1.02E-01 | 1.50E-01 | 3.47E-05 | 4.80E-03 |
| <i>CG7974</i>  | FBgn0035254 | FBpp0072646   | Cobs_03581 | 1       | 5.13 | 5.50 | 4.70  | 5.18 | 2.62E-02 | 9.13E-01 | 4.45E-02 | 6.07E-02 | 7.38E-05 | 2.37E-02 |

|                    |             |               |            |   |      |      |       |      |          |          |          |          |          |          |
|--------------------|-------------|---------------|------------|---|------|------|-------|------|----------|----------|----------|----------|----------|----------|
| -                  | -           | FBpp0290378   | Cobs_03957 | 0 | 4.02 | 4.44 | 3.50  | 4.01 | 2.40E-02 | 9.80E-01 | 3.37E-02 | 3.21E-02 | 5.30E-05 | 3.33E-02 |
| <i>Patj</i>        | FBgn0067864 | FBpp0072664   | Cobs_03964 | 1 | 6.16 | 6.21 | 5.65  | 6.18 | 3.93E-03 | 9.19E-01 | 7.66E-01 | 8.54E-01 | 6.78E-04 | 4.14E-03 |
| <i>CG34127</i>     | FBgn0083963 | FBpp0290294   | Cobs_04087 | 0 | 0.76 | 0.88 | -0.10 | 0.88 | 4.19E-02 | 8.63E-01 | 8.65E-01 | 9.93E-01 | 1.50E-02 | 3.29E-02 |
| <i>ome</i>         | FBgn0259175 | FBpp0288925   | Cobs_04370 | 0 | 3.53 | 3.36 | 4.29  | 3.54 | 3.36E-02 | 9.95E-01 | 6.96E-01 | 7.01E-01 | 6.63E-03 | 4.31E-02 |
| <i>CG3523</i>      | FBgn0027571 | FBpp0077343   | Cobs_04512 | 0 | 0.44 | 0.45 | 1.65  | 0.65 | 4.89E-03 | 8.02E-01 | 9.09E-01 | 6.87E-01 | 1.68E-03 | 1.48E-02 |
| <i>CG9836</i>      | FBgn0037637 | FBpp0081412   | Cobs_04843 | 1 | 6.19 | 6.35 | 7.01  | 6.44 | 1.10E-03 | 2.66E-01 | 5.15E-01 | 7.16E-01 | 2.61E-03 | 1.98E-02 |
| <i>eyg</i>         | FBgn0000625 | FBpp0099525   | Cobs_04962 | 1 | 1.98 | 1.82 | 0.41  | 2.55 | 2.62E-02 | 2.26E-01 | 9.55E-01 | 2.19E-01 | 1.94E-02 | 2.86E-03 |
| NA                 | NA          | No hits found | Cobs_05113 | 0 | 4.55 | 4.75 | 3.86  | 5.17 | 1.85E-02 | 1.21E-02 | 5.25E-01 | 7.48E-02 | 1.51E-03 | 1.05E-04 |
| <i>modSP</i>       | FBgn0051217 | FBpp0082798   | Cobs_05218 | 1 | 1.47 | 0.64 | 2.80  | 0.95 | 2.85E-03 | 3.39E-01 | 1.24E-01 | 6.12E-01 | 4.54E-05 | 6.31E-04 |
| <i>Pld</i>         | FBgn0033075 | FBpp0112984   | Cobs_05363 | 1 | 5.67 | 5.89 | 6.62  | 5.90 | 6.93E-03 | 4.97E-01 | 5.58E-01 | 9.47E-01 | 1.77E-02 | 4.55E-02 |
| -                  | -           | FBpp0075388   | Cobs_05476 | 0 | 0.97 | 0.90 | 2.06  | 0.89 | 3.85E-02 | 9.61E-01 | 9.66E-01 | 9.96E-01 | 2.25E-02 | 4.58E-02 |
| <i>Int6</i>        | FBgn0025582 | FBpp0075104   | Cobs_05569 | 1 | 6.80 | 6.94 | 6.36  | 6.93 | 2.18E-02 | 4.95E-01 | 4.55E-01 | 9.61E-01 | 1.27E-03 | 4.95E-03 |
| <i>schlank</i>     | FBgn0040918 | FBpp0070899   | Cobs_05570 | 1 | 6.48 | 6.63 | 7.09  | 6.05 | 1.42E-02 | 6.24E-02 | 5.53E-01 | 1.29E-02 | 3.68E-02 | 3.36E-04 |
| <i>mib1</i>        | FBgn0263601 | FBpp0075275   | Cobs_05642 | 0 | 0.88 | 0.88 | 3.25  | 1.27 | 1.10E-04 | 5.32E-01 | 9.77E-01 | 5.06E-01 | 3.47E-05 | 6.41E-04 |
| <i>CG42399</i>     | FBgn0259818 | FBpp0291141   | Cobs_06081 | 1 | 4.29 | 3.85 | 4.75  | 3.50 | 4.91E-02 | 2.43E-03 | 7.50E-02 | 2.01E-01 | 3.02E-04 | 1.05E-04 |
| -                  | -           | FBpp0075388   | Cobs_06389 | 0 | 1.55 | 1.99 | 2.60  | 1.86 | 1.52E-03 | 4.11E-01 | 1.75E-01 | 6.55E-01 | 2.44E-02 | 1.71E-02 |
| NA                 | NA          | No hits found | Cobs_06694 | 0 | 1.60 | 1.87 | 3.26  | 2.04 | 1.98E-04 | 3.37E-01 | 6.40E-01 | 6.87E-01 | 2.71E-04 | 3.16E-03 |
| <i>CG31715</i>     | FBgn0051715 | FBpp0079586   | Cobs_06730 | 0 | 1.40 | 1.78 | -0.57 | 1.15 | 3.86E-04 | 5.83E-01 | 3.48E-01 | 1.17E-01 | 1.62E-05 | 2.92E-03 |
| <i>Caps</i>        | FBgn0053653 | FBpp0088330   | Cobs_06848 | 1 | 6.27 | 6.48 | 5.78  | 6.22 | 1.50E-02 | 8.36E-01 | 2.77E-01 | 1.68E-01 | 3.59E-04 | 3.25E-02 |
| <i>CG31612</i>     | FBgn0051612 | FBpp0290221   | Cobs_07027 | 0 | 2.28 | 2.08 | 3.98  | 2.23 | 1.74E-04 | 9.03E-01 | 8.12E-01 | 7.03E-01 | 4.13E-05 | 5.53E-04 |
| <i>CG9222</i>      | FBgn0031784 | FBpp0078832   | Cobs_07097 | 1 | 1.35 | 1.92 | 2.62  | 1.72 | 2.68E-04 | 2.19E-01 | 8.51E-02 | 6.81E-01 | 9.08E-03 | 9.10E-03 |
| <i>CG8646</i>      | FBgn0033763 | FBpp0290455   | Cobs_07270 | 0 | 5.65 | 5.09 | 6.42  | 5.15 | 1.16E-02 | 1.06E-01 | 7.38E-02 | 8.75E-01 | 5.84E-05 | 4.72E-04 |
| -                  | -           | FBpp0074840   | Cobs_07536 | 0 | 3.76 | 3.69 | 4.18  | 3.78 | 2.82E-02 | 9.82E-01 | 7.63E-01 | 7.35E-01 | 6.25E-03 | 3.87E-02 |
| <i>CG5902</i>      | FBgn0039136 | FBpp0290388   | Cobs_07588 | 0 | 4.66 | 4.74 | 4.01  | 4.56 | 3.25E-03 | 7.37E-01 | 6.70E-01 | 4.01E-01 | 4.01E-04 | 1.22E-02 |
| <i>pyx</i>         | FBgn0035113 | FBpp0072423   | Cobs_07686 | 1 | 4.39 | 4.36 | 3.71  | 4.16 | 2.67E-03 | 2.66E-01 | 8.80E-01 | 3.70E-01 | 1.90E-03 | 4.90E-02 |
| <i>CG3085</i>      | FBgn0034816 | FBpp0071873   | Cobs_07956 | 1 | 2.92 | 2.96 | 3.99  | 2.98 | 2.06E-04 | 7.99E-01 | 9.60E-01 | 8.41E-01 | 1.05E-04 | 8.10E-04 |
| <i>alphaTub84B</i> | FBgn0003884 | FBpp0081153   | Cobs_08137 | 0 | 2.32 | 2.52 | 1.47  | 2.44 | 3.79E-02 | 7.52E-01 | 5.98E-01 | 8.71E-01 | 4.99E-03 | 2.23E-02 |
| -                  | -           | FBpp0076126   | Cobs_08142 | 1 | 4.67 | 5.50 | 4.12  | 4.61 | 2.40E-02 | 8.70E-01 | 2.87E-04 | 2.20E-04 | 9.38E-07 | 4.68E-02 |
| <i>fln</i>         | FBgn0005633 | FBpp0074679   | Cobs_08145 | 1 | 2.13 | 2.27 | 3.10  | 2.16 | 1.51E-02 | 9.53E-01 | 8.10E-01 | 7.57E-01 | 1.78E-02 | 1.81E-02 |

|                |             |               |            |   |       |       |       |      |          |          |          |          |          |          |
|----------------|-------------|---------------|------------|---|-------|-------|-------|------|----------|----------|----------|----------|----------|----------|
| <i>RpS18</i>   | FBgn0010411 | FBpp0085586   | Cobs_08275 | 1 | 9.58  | 10.17 | 9.12  | 9.65 | 2.09E-02 | 6.97E-01 | 1.82E-03 | 5.88E-03 | 3.43E-06 | 9.11E-03 |
| <i>CG5823</i>  | FBgn0038515 | FBpp0082929   | Cobs_08440 | 0 | 5.08  | 5.09  | 5.98  | 5.22 | 3.51E-03 | 6.75E-01 | 9.83E-01 | 6.88E-01 | 1.75E-03 | 1.54E-02 |
| <i>CG9068</i>  | FBgn0034106 | FBpp0086282   | Cobs_08477 | 0 | 2.55  | 2.48  | 4.57  | 2.84 | 2.71E-05 | 3.86E-01 | 8.12E-01 | 2.51E-01 | 4.12E-06 | 3.36E-04 |
| <i>nopo</i>    | FBgn0034314 | FBpp0085929   | Cobs_08593 | 0 | 3.75  | 4.19  | 2.84  | 3.75 | 3.45E-03 | 9.70E-01 | 9.00E-02 | 8.20E-02 | 2.50E-05 | 5.99E-03 |
| <i>CG5235</i>  | FBgn0036565 | FBpp0075252   | Cobs_08751 | 1 | 6.14  | 5.98  | 5.62  | 6.00 | 1.87E-03 | 3.29E-01 | 2.77E-01 | 9.26E-01 | 1.36E-02 | 2.43E-02 |
| <i>hdc</i>     | FBgn0010113 | FBpp0084985   | Cobs_08825 | 0 | 5.64  | 5.85  | 5.00  | 5.62 | 2.72E-02 | 9.59E-01 | 4.75E-01 | 4.30E-01 | 1.86E-03 | 3.78E-02 |
| <i>hdc</i>     | FBgn0010113 | FBpp0084984   | Cobs_08828 | 1 | 5.53  | 5.61  | 4.35  | 5.36 | 1.57E-03 | 6.52E-01 | 8.23E-01 | 4.63E-01 | 2.90E-04 | 7.31E-03 |
| <i>mei-P26</i> | FBgn0026206 | FBpp0071238   | Cobs_08965 | 0 | 2.97  | 3.31  | 2.08  | 2.87 | 2.77E-02 | 9.09E-01 | 3.66E-01 | 2.98E-01 | 1.34E-03 | 4.98E-02 |
| <i>CG31678</i> | FBgn0051678 | FBpp0288498   | Cobs_09096 | 1 | 6.04  | 5.82  | 6.42  | 6.05 | 3.52E-02 | 9.73E-01 | 2.02E-01 | 1.81E-01 | 6.46E-04 | 4.58E-02 |
| <i>CG31145</i> | FBgn0051145 | FBpp0083871   | Cobs_09276 | 1 | 4.30  | 4.05  | 5.34  | 4.78 | 3.34E-04 | 5.32E-02 | 3.61E-01 | 5.61E-03 | 1.62E-05 | 3.87E-02 |
| <i>NA</i>      | NA          | No hits found | Cobs_09383 | 0 | 1.07  | 0.02  | 1.91  | 0.99 | 2.92E-02 | 9.62E-01 | 1.56E-02 | 1.99E-02 | 3.74E-05 | 3.57E-02 |
| <i>CG10737</i> | FBgn0034420 | FBpp0288750   | Cobs_09407 | 0 | 1.83  | 2.58  | 0.80  | 1.91 | 2.48E-02 | 8.40E-01 | 4.76E-02 | 9.26E-02 | 9.87E-05 | 1.91E-02 |
| -              | -           | FBpp0292168   | Cobs_09455 | 0 | 3.45  | 3.46  | 3.91  | 3.42 | 1.64E-02 | 7.72E-01 | 9.82E-01 | 7.86E-01 | 8.14E-03 | 1.05E-02 |
| <i>CG8507</i>  | FBgn0037756 | FBpp0081618   | Cobs_09518 | 1 | 5.55  | 5.13  | 5.93  | 5.53 | 4.02E-02 | 9.52E-01 | 1.58E-02 | 1.88E-02 | 4.57E-05 | 4.10E-02 |
| <i>en</i>      | FBgn0000577 | FBpp0087198   | Cobs_09569 | 0 | 2.65  | 1.86  | 1.41  | 1.93 | 1.06E-05 | 8.47E-04 | 3.52E-04 | 7.88E-01 | 4.76E-02 | 4.32E-02 |
| <i>CG31344</i> | FBgn0051344 | FBpp0082590   | Cobs_09630 | 0 | 2.30  | 3.32  | -0.12 | 2.71 | 8.66E-03 | 6.36E-01 | 8.31E-02 | 2.40E-01 | 1.04E-04 | 4.13E-03 |
| <i>Trim9</i>   | FBgn0051721 | FBpp0079685   | Cobs_09781 | 1 | 1.89  | 1.89  | 1.02  | 1.96 | 4.17E-02 | 8.92E-01 | 8.98E-01 | 7.73E-01 | 3.89E-02 | 3.66E-02 |
| <i>NA</i>      | NA          | No hits found | Cobs_10064 | 0 | 4.09  | 3.95  | 4.64  | 3.68 | 3.80E-02 | 1.58E-01 | 6.27E-01 | 4.17E-01 | 5.46E-03 | 2.43E-03 |
| <i>CG7328</i>  | FBgn0036942 | FBpp0074633   | Cobs_10085 | 1 | 2.63  | 3.31  | 4.18  | 2.90 | 1.88E-03 | 7.50E-01 | 2.05E-01 | 3.90E-01 | 2.01E-02 | 6.84E-03 |
| <i>CG2519</i>  | FBgn0037336 | FBpp0078408   | Cobs_10106 | 1 | 6.43  | 6.34  | 5.98  | 6.32 | 7.40E-03 | 5.05E-01 | 5.96E-01 | 9.17E-01 | 1.62E-02 | 4.64E-02 |
| <i>His3.3A</i> | FBgn0014857 | FBpp0078649   | Cobs_10112 | 0 | 10.05 | 9.70  | 9.15  | 9.70 | 4.97E-05 | 3.87E-02 | 4.42E-02 | 9.96E-01 | 1.70E-03 | 5.41E-03 |
| <i>CG15760</i> | FBgn0030508 | FBpp0073641   | Cobs_10289 | 1 | 4.57  | 4.77  | 3.70  | 4.38 | 1.45E-03 | 4.84E-01 | 3.39E-01 | 7.85E-02 | 4.56E-05 | 1.21E-02 |
| <i>Spec2</i>   | FBgn0044823 | FBpp0078388   | Cobs_10647 | 1 | 4.40  | 4.13  | 4.84  | 4.32 | 3.66E-02 | 7.58E-01 | 2.65E-01 | 4.74E-01 | 1.09E-03 | 2.14E-02 |
| <i>CG5819</i>  | FBgn0034717 | FBpp0071725   | Cobs_10669 | 0 | 3.75  | 3.83  | 3.16  | 3.72 | 5.30E-03 | 9.26E-01 | 5.91E-01 | 5.12E-01 | 5.56E-04 | 1.10E-02 |
| <i>CG34150</i> | FBgn0083986 | FBpp0290226   | Cobs_10695 | 1 | 2.63  | 2.72  | 3.38  | 2.72 | 1.22E-02 | 8.97E-01 | 8.75E-01 | 9.87E-01 | 1.07E-02 | 2.51E-02 |
| <i>CG10927</i> | FBgn0034360 | FBpp0085884   | Cobs_10943 | 1 | 4.20  | 4.01  | 3.25  | 4.14 | 2.32E-02 | 8.93E-01 | 7.17E-01 | 8.43E-01 | 3.81E-02 | 4.20E-02 |
| <i>NA</i>      | NA          | No hits found | Cobs_11124 | 0 | 2.13  | 1.02  | 3.39  | 2.40 | 6.74E-04 | 4.52E-01 | 1.38E-02 | 2.19E-03 | 2.04E-06 | 7.90E-03 |
| <i>Cht6</i>    | FBgn0263132 | FBpp0298361   | Cobs_11702 | 0 | 1.58  | 1.03  | 2.93  | 0.28 | 4.51E-02 | 9.75E-02 | 4.56E-01 | 4.32E-01 | 4.44E-03 | 2.50E-03 |
| <i>CG15894</i> | FBgn0029864 | FBpp0111868   | Cobs_11735 | 1 | 5.42  | 5.68  | 4.98  | 5.65 | 3.31E-02 | 2.44E-01 | 1.77E-01 | 8.75E-01 | 4.97E-04 | 2.96E-03 |

|                   |             |               |            |   |      |      |       |      |          |          |          |          |          |          |
|-------------------|-------------|---------------|------------|---|------|------|-------|------|----------|----------|----------|----------|----------|----------|
| <i>Ir8a</i>       | FBgn0052704 | FBpp0071268   | Cobs_11809 | 1 | 1.87 | 1.66 | 3.12  | 2.05 | 2.96E-03 | 6.41E-01 | 6.48E-01 | 3.22E-01 | 4.29E-04 | 1.68E-02 |
| NA                | NA          | No hits found | Cobs_11882 | 0 | 3.38 | 3.66 | 2.58  | 3.29 | 4.92E-03 | 7.87E-01 | 2.51E-01 | 1.37E-01 | 1.20E-04 | 1.66E-02 |
| <i>lap</i>        | FBgn0086372 | FBpp0293685   | Cobs_11928 | 0 | 4.27 | 4.43 | 3.41  | 4.12 | 6.22E-04 | 5.54E-01 | 4.49E-01 | 1.47E-01 | 3.28E-05 | 4.64E-03 |
| <i>Edem1</i>      | FBgn0023511 | FBpp0294034   | Cobs_12086 | 0 | 1.96 | 1.78 | -2.99 | 1.23 | 2.87E-05 | 2.66E-01 | 8.39E-01 | 4.06E-01 | 1.62E-05 | 6.31E-04 |
| <i>CG9636</i>     | FBgn0037556 | FBpp0081302   | Cobs_12235 | 1 | 2.94 | 3.04 | 2.24  | 2.80 | 2.08E-03 | 5.78E-01 | 6.43E-01 | 2.72E-01 | 2.35E-04 | 1.42E-02 |
| -                 | -           | FBpp0080115   | Cobs_12781 | 1 | 6.43 | 6.38 | 6.97  | 6.47 | 1.17E-03 | 8.18E-01 | 8.01E-01 | 5.87E-01 | 2.00E-04 | 3.17E-03 |
| <i>slp2</i>       | FBgn0004567 | FBpp0077189   | Cobs_12891 | 1 | 4.12 | 4.11 | 3.36  | 4.12 | 5.55E-03 | 9.33E-01 | 9.86E-01 | 9.18E-01 | 2.92E-03 | 6.79E-03 |
| <i>mbc</i>        | FBgn0015513 | FBpp0293271   | Cobs_13017 | 1 | 6.96 | 6.95 | 7.29  | 6.97 | 3.22E-02 | 9.82E-01 | 9.53E-01 | 9.32E-01 | 1.43E-02 | 3.99E-02 |
| <i>CG9990</i>     | FBgn0039594 | FBpp0292406   | Cobs_13154 | 0 | 1.34 | 0.96 | 2.64  | 1.20 | 4.96E-03 | 8.72E-01 | 4.36E-01 | 5.76E-01 | 3.53E-04 | 5.90E-03 |
| <i>rev7</i>       | FBgn0037345 | FBpp0078348   | Cobs_13161 | 1 | 5.05 | 5.38 | 3.67  | 4.77 | 3.03E-04 | 3.03E-01 | 3.10E-01 | 3.36E-02 | 1.02E-05 | 5.40E-03 |
| NA                | NA          | No hits found | Cobs_13539 | 0 | 3.72 | 4.25 | 3.11  | 3.90 | 2.34E-02 | 4.48E-01 | 1.94E-02 | 1.33E-01 | 3.28E-05 | 5.05E-03 |
| <i>baz</i>        | FBgn0000163 | FBpp0074162   | Cobs_13815 | 0 | 2.88 | 2.84 | 1.41  | 2.57 | 1.06E-03 | 3.54E-01 | 8.73E-01 | 4.81E-01 | 6.99E-04 | 1.39E-02 |
| <i>v(2)k05816</i> | FBgn0042627 | FBpp0077342   | Cobs_13853 | 0 | 1.08 | 1.16 | 2.17  | 0.99 | 4.17E-02 | 8.14E-01 | 9.91E-01 | 8.15E-01 | 2.50E-02 | 2.92E-02 |
| <i>rod</i>        | FBgn0003268 | FBpp0085156   | Cobs_13908 | 0 | 3.63 | 3.73 | 5.07  | 3.56 | 4.25E-04 | 8.51E-01 | 8.42E-01 | 6.73E-01 | 3.06E-04 | 5.37E-04 |
| <i>CG11070</i>    | FBgn0028467 | FBpp0078927   | Cobs_14122 | 1 | 6.34 | 6.18 | 6.86  | 6.36 | 2.57E-02 | 9.65E-01 | 4.91E-01 | 4.48E-01 | 1.84E-03 | 3.37E-02 |
| <i>dtr</i>        | FBgn0023090 | FBpp0081044   | Cobs_14335 | 0 | 1.57 | 0.85 | 2.98  | 1.59 | 2.51E-03 | 9.69E-01 | 1.16E-01 | 1.30E-01 | 3.40E-05 | 3.76E-03 |
| <i>iPLA2-VIA</i>  | FBgn0036053 | FBpp0076091   | Cobs_14337 | 1 | 4.30 | 4.21 | 5.33  | 4.31 | 1.74E-04 | 8.29E-01 | 8.14E-01 | 6.20E-01 | 2.83E-05 | 5.43E-04 |
| <i>Top3alpha</i>  | FBgn0040268 | FBpp0080787   | Cobs_14339 | 1 | 4.99 | 4.54 | 5.55  | 4.80 | 5.44E-03 | 3.29E-01 | 1.83E-02 | 1.82E-01 | 8.14E-06 | 7.62E-04 |
| <i>CG10869</i>    | FBgn0031347 | FBpp0077583   | Cobs_14392 | 0 | 4.53 | 4.28 | 2.98  | 4.17 | 2.19E-04 | 2.33E-01 | 4.41E-01 | 7.45E-01 | 6.33E-04 | 5.48E-03 |
| -                 | -           | FBpp0293081   | Cobs_14410 | 0 | 5.18 | 3.84 | 2.50  | 4.29 | 1.34E-06 | 5.62E-03 | 3.20E-04 | 2.66E-01 | 2.22E-03 | 5.53E-04 |
| <i>CG7044</i>     | FBgn0038854 | FBpp0083437   | Cobs_14414 | 1 | 4.64 | 4.65 | 5.86  | 5.03 | 3.48E-06 | 4.91E-02 | 9.99E-01 | 5.32E-02 | 1.05E-06 | 4.60E-04 |
| <i>dpr8</i>       | FBgn0052600 | FBpp0073730   | Cobs_14545 | 0 | 1.65 | 1.26 | 2.83  | 1.47 | 4.30E-03 | 8.99E-01 | 4.45E-01 | 5.62E-01 | 3.37E-04 | 5.99E-03 |
| <i>wapl</i>       | FBgn0004655 | FBpp0070414   | Cobs_14787 | 1 | 7.33 | 7.27 | 6.97  | 7.21 | 1.57E-03 | 2.26E-01 | 5.57E-01 | 6.04E-01 | 3.09E-03 | 3.15E-02 |
| <i>disp</i>       | FBgn0029088 | FBpp0078314   | Cobs_14998 | 0 | 3.65 | 3.69 | 2.79  | 3.54 | 1.55E-03 | 6.44E-01 | 8.31E-01 | 4.70E-01 | 3.22E-04 | 8.25E-03 |
| <i>CG3704</i>     | FBgn0040346 | FBpp0070181   | Cobs_15106 | 1 | 3.51 | 3.40 | 2.92  | 3.61 | 2.50E-02 | 8.32E-01 | 6.98E-01 | 5.11E-01 | 4.58E-02 | 1.79E-02 |
| <i>MTA1-like</i>  | FBgn0027951 | FBpp0078383   | Cobs_15151 | 1 | 7.78 | 7.74 | 7.14  | 7.54 | 1.74E-04 | 7.11E-02 | 7.84E-01 | 1.50E-01 | 1.02E-04 | 1.13E-02 |
| <i>CG4098</i>     | FBgn0036648 | FBpp0075120   | Cobs_15461 | 1 | 3.93 | 3.91 | 4.65  | 4.21 | 1.88E-04 | 8.59E-02 | 8.59E-01 | 5.64E-02 | 3.57E-05 | 1.31E-02 |
| <i>CG10336</i>    | FBgn0032698 | FBpp0271702   | Cobs_15515 | 1 | 5.93 | 6.00 | 6.41  | 6.10 | 1.94E-03 | 2.66E-01 | 6.68E-01 | 5.57E-01 | 2.81E-03 | 3.35E-02 |
| <i>CG12016</i>    | FBgn0035436 | FBpp0072928   | Cobs_15636 | 1 | 4.84 | 5.40 | 6.03  | 5.23 | 1.16E-03 | 2.47E-01 | 9.52E-02 | 6.58E-01 | 3.50E-02 | 2.38E-02 |

|              |             |               |            |   |      |      |      |      |          |          |          |          |          |          |
|--------------|-------------|---------------|------------|---|------|------|------|------|----------|----------|----------|----------|----------|----------|
| NA           | NA          | No hits found | Cobs_15663 | 0 | 1.35 | 1.04 | 0.07 | 1.27 | 4.26E-03 | 9.94E-01 | 4.51E-01 | 4.65E-01 | 1.87E-02 | 7.69E-03 |
| NA           | NA          | No hits found | Cobs_15687 | 0 | 2.83 | 3.15 | 3.97 | 3.15 | 7.39E-04 | 2.79E-01 | 3.31E-01 | 9.45E-01 | 4.27E-03 | 1.54E-02 |
| CG31224      | FBgn0051224 | FBpp0083106   | Cobs_15893 | 0 | 1.42 | 1.18 | 5.54 | 1.97 | 1.07E-06 | 3.74E-01 | 8.08E-01 | 2.46E-01 | 4.98E-07 | 8.35E-06 |
| Osi24        | FBgn0037409 | FBpp0078240   | Cobs_16254 | 1 | 1.44 | 0.75 | 2.80 | 1.30 | 6.22E-04 | 8.20E-01 | 1.14E-01 | 2.07E-01 | 1.01E-05 | 6.31E-04 |
| Ir75b        | FBgn0261402 | FBpp0291499   | Cobs_16368 | 0 | 1.69 | 1.44 | 2.84 | 1.43 | 1.34E-02 | 7.62E-01 | 6.18E-01 | 8.82E-01 | 1.82E-03 | 1.01E-02 |
| CG5800       | FBgn0030855 | FBpp0074227   | Cobs_16620 | 1 | 5.08 | 5.15 | 5.51 | 5.12 | 2.66E-02 | 8.94E-01 | 7.73E-01 | 8.89E-01 | 3.59E-02 | 4.68E-02 |
| Oli          | FBgn0032651 | FBpp0292345   | Cobs_16678 | 1 | 2.90 | 2.93 | 2.20 | 2.97 | 3.36E-02 | 7.07E-01 | 8.45E-01 | 8.71E-01 | 1.13E-02 | 1.76E-02 |
| CG30053      | FBgn0050053 | FBpp0086986   | Cobs_16700 | 1 | 4.48 | 5.45 | 3.95 | 4.74 | 3.10E-02 | 2.40E-01 | 4.58E-05 | 1.51E-03 | 4.98E-07 | 2.81E-03 |
| CG43088      | FBgn0262534 | FBpp0293413   | Cobs_16906 | 0 | 1.34 | 1.55 | 2.79 | 1.88 | 5.79E-04 | 2.09E-01 | 6.97E-01 | 4.52E-01 | 7.36E-04 | 1.54E-02 |
| Gr43a        | FBgn0041243 | FBpp0088086   | Cobs_16932 | 1 | 2.99 | 3.25 | 1.89 | 2.76 | 3.94E-03 | 5.29E-01 | 4.51E-01 | 1.41E-01 | 2.45E-04 | 2.92E-02 |
| -            | -           | FBpp0292060   | Cobs_16972 | 0 | 3.10 | 3.28 | 2.53 | 3.20 | 3.83E-02 | 6.04E-01 | 5.33E-01 | 9.41E-01 | 3.81E-03 | 1.43E-02 |
| Liprin-gamma | FBgn0034720 | FBpp0112020   | Cobs_17090 | 1 | 5.45 | 5.76 | 4.71 | 5.33 | 5.44E-03 | 7.09E-01 | 1.91E-01 | 7.42E-02 | 8.05E-05 | 2.10E-02 |
| RNaseX25     | FBgn0010406 | FBpp0076469   | Cobs_17205 | 0 | 3.30 | 2.75 | 3.79 | 3.29 | 4.95E-02 | 8.73E-01 | 2.80E-02 | 4.69E-02 | 1.20E-04 | 4.10E-02 |
| Nckx30C      | FBgn0028704 | FBpp0079518   | Cobs_17255 | 0 | 2.10 | 2.29 | 1.38 | 2.17 | 2.91E-02 | 8.36E-01 | 6.32E-01 | 8.22E-01 | 4.02E-03 | 2.24E-02 |
| CG31301      | FBgn0051301 | FBpp0082543   | Cobs_17438 | 1 | 4.79 | 4.54 | 5.38 | 4.90 | 3.14E-03 | 5.56E-01 | 2.00E-01 | 4.89E-02 | 5.13E-05 | 2.03E-02 |
| NA           | NA          | No hits found | Cobs_17502 | 0 | 3.37 | 3.30 | 4.31 | 3.49 | 1.88E-03 | 7.17E-01 | 7.79E-01 | 4.81E-01 | 3.54E-04 | 8.47E-03 |
| AGO3         | FBgn0250816 | FBpp0289160   | Cobs_17573 | 1 | 5.75 | 5.42 | 6.12 | 5.54 | 2.32E-02 | 1.62E-01 | 2.77E-02 | 4.54E-01 | 4.22E-05 | 1.13E-03 |
| CG4393       | FBgn0039075 | FBpp0290307   | Cobs_17709 | 0 | 5.05 | 5.12 | 4.60 | 5.01 | 1.54E-02 | 8.63E-01 | 6.99E-01 | 5.39E-01 | 2.35E-03 | 3.22E-02 |
| Lip4         | FBgn0032264 | FBpp0293062   | Cobs_18114 | 0 | 2.15 | 0.66 | 3.09 | 2.19 | 1.49E-02 | 8.33E-01 | 4.39E-03 | 2.75E-03 | 1.41E-05 | 3.97E-02 |
| CG13920      | FBgn0025712 | FBpp0072644   | Cobs_18242 | 1 | 2.87 | 3.03 | 2.09 | 3.05 | 2.51E-02 | 6.10E-01 | 5.56E-01 | 9.54E-01 | 2.63E-03 | 9.71E-03 |
| nAChRbeta3   | FBgn0031261 | FBpp0077724   | Cobs_18259 | 1 | 6.18 | 6.11 | 5.63 | 6.22 | 2.88E-02 | 9.08E-01 | 8.12E-01 | 6.97E-01 | 3.26E-02 | 2.47E-02 |



**Supplementary Table S4: Expression patterns of sphingolipid metabolic genes**

The binary flag Orthology is set to 1, if orthology was confirmed in reciprocal blasts. The columns EM, QU, WM, and WO give the mean expression as assessed by limma. The last six columns give FDR values for pairwise comparisons, also produced with limma.

| FB gene symbol | FB gene ID  | FB gene name                  | C.obs ID   | Orthol. | EM   | QU   | WM   | WO   | EM vs WM | EM vs WO | EM vs QU | QU vs WO | QU vs WM | WO vs WM |
|----------------|-------------|-------------------------------|------------|---------|------|------|------|------|----------|----------|----------|----------|----------|----------|
| <i>bsk</i>     | FBgn0000229 | basket                        | Cobs_05382 | 1       | 4.31 | 4.26 | 4.46 | 3.98 | 4.38E-01 | 7.05E-02 | 8.15E-01 | 1.38E-01 | 2.40E-01 | 1.85E-02 |
| <i>bwa</i>     | FBgn0045064 | brain washing                 | Cobs_11439 | 1       | NA   | NA   | NA   | NA   | NA       | NA       | NA       | NA       | NA       | NA       |
| <i>bwa</i>     | FBgn0045064 | brain washing                 | Cobs_16616 | 0       | 2.05 | 2.83 | 1.41 | 1.95 | 4.06E-01 | 9.99E-01 | 1.54E-01 | 1.67E-01 | 1.59E-02 | 4.62E-01 |
| <i>CDase</i>   | FBgn0039774 | Ceramidase                    | Cobs_12432 | 1       | 4.35 | 5.80 | 4.64 | 4.93 | 6.90E-01 | 2.97E-01 | 7.43E-03 | 9.67E-02 | 1.86E-02 | 6.52E-01 |
| <i>CDase</i>   | FBgn0039774 | Ceramidase                    | Cobs_12439 | 0       | 5.00 | 6.44 | 4.97 | 5.38 | 9.48E-01 | 4.92E-01 | 6.49E-03 | 4.21E-02 | 3.87E-03 | 4.92E-01 |
| <i>hep</i>     | FBgn0010303 | hemipterous                   | Cobs_07321 | 1       | 5.75 | 5.95 | 5.53 | 5.67 | 1.11E-01 | 5.72E-01 | 1.50E-01 | 3.46E-02 | 1.75E-03 | 3.65E-01 |
| <i>ifc</i>     | FBgn0001941 | infertile crescent            | Cobs_16634 | 1       | 6.39 | 7.12 | 6.93 | 6.87 | 1.72E-01 | 1.92E-01 | 4.42E-02 | 5.17E-01 | 6.08E-01 | 9.23E-01 |
| <i>lace</i>    | FBgn0002524 | lace                          | Cobs_18257 | 1       | 7.60 | 8.06 | 7.76 | 6.85 | 6.87E-01 | 2.47E-02 | 1.80E-01 | 7.74E-04 | 3.81E-01 | 1.71E-02 |
| <i>schlank</i> | FBgn0040918 | schlank                       | Cobs_05570 | 1       | 6.48 | 6.63 | 7.09 | 6.05 | 1.42E-02 | 6.24E-02 | 5.53E-01 | 1.29E-02 | 3.68E-02 | 3.36E-04 |
| <i>slpr</i>    | FBgn0030018 | slipper                       | Cobs_17593 | 1       | 7.44 | 7.56 | 7.37 | 7.25 | 6.75E-01 | 1.40E-01 | 3.91E-01 | 1.62E-02 | 1.43E-01 | 4.24E-01 |
| <i>Sply</i>    | FBgn0010591 | Sphingosine-1-phosphate lyase | Cobs_00908 | 1       | 6.54 | 7.43 | 7.56 | 7.73 | 5.36E-03 | 6.02E-04 | 7.64E-03 | 3.97E-01 | 7.31E-01 | 7.11E-01 |
| <i>egh</i>     | FBgn0001404 | egghead                       | Cobs_06699 | 1       | 4.28 | 4.09 | 4.56 | 4.59 | 2.53E-01 | 1.63E-01 | 5.34E-01 | 3.81E-02 | 4.71E-02 | 9.13E-01 |
| <i>Sk2</i>     | FBgn0052484 | Sphingosine kinase 2          | Cobs_17596 | 1       | 5.41 | 6.77 | 5.73 | 4.98 | 2.56E-01 | 1.09E-01 | 6.87E-06 | 5.59E-07 | 1.27E-04 | 1.27E-02 |

## Supplementary References

- Alexa A, Rahnenfuhrer J. 2010. topGO: topGO: Enrichment analysis for Gene Ontology. R package version 2.18.0.
- Grossmann S, Bauer S, Robinson PN, Vingron M. 2007. Improved detection of overrepresentation of Gene-Ontology annotations with parent child analysis. *Bioinformatics*, 23(22), 3024–3031. doi:10.1093/bioinformatics/btm440
- Schrader L, Kim JW, Ence D, Zimin A, Klein A, Wyszczetki K, et al. 2014. Transposable element islands facilitate adaptation to novel environments in an invasive species. *Nature Communications*, 5, 5495. doi:10.1038/ncomms6495
- Supek F, Bošnjak M, Škunca N, Šmuc T. 2011. REVIGO Summarizes and Visualizes Long Lists of Gene Ontology Terms. *PLoS ONE*, 6(7), e21800. doi:10.1371/journal.pone.0021800.t001
